# Supplementary material for: Rapid DNA-genotyping system targeting ten loci for resistance to blast disease in rice
Source: PubMed Central journal article supplement — Breed Sci. 2019 Feb 15;69(1):68–83. doi: 10.1270/jsbbs.18143 (PMC6507720; doi:10.1270/jsbbs.18143), 2019-02-15
Supplement: 69_18143_1.pdf [file 69_18143_1.pdf]

Legends for **Supplemental Figs. 1–10**. SNP genotyping assays for each of the 10 loci.

(A) Positions of the resistance loci on each chromosome in ‘Nipponbare’ IRGSP-1.0. S, short-arm side of the chromosome; L, long-arm side of the chromosome; Cen., centromere. The numbers before the letters L or S represent chromosome number.

(B) Distribution of SNPs surveyed (horizontal gray bars) and tested (horizontal green arrows) and positions of tested and selected SNP genotyping assays. Positions (bp) on left and right sides of each range refer to the ‘Nipponbare’ reference. The positions of tested and selected assays are indicated by vertical green and red bars, respectively, and their numbers are indicated in parentheses on the left. Pink asterisks indicate “core set” assays that are required to distinguish a certain resistance haplotype from susceptibility haplotype (see Supplemental Table 4 for details).

(C) Physical maps showing positions of the genes that share similarities with genes encoding proteins with nucleotide-binding site (NBS) or leucine-rich repeat (LRR) domains or have been reported previously to be disease resistance-associated genes in ‘Nipponbare’ and donor varieties of resistance alleles. Cloned resistance genes are indicated by red boxes. The names of SNP genotyping assays in BRA1 are indicated below the maps; those selected in the ‘core set’ are highlighted in red.

(D) Enlarged views of physical maps showing the region containing the NBS-LRR cluster at the *Pish* locus (Supplemental Fig. 2) and the region harboring two resistance genes in the K-type genome at the *Pik* locus (Supplemental Fig. 8).

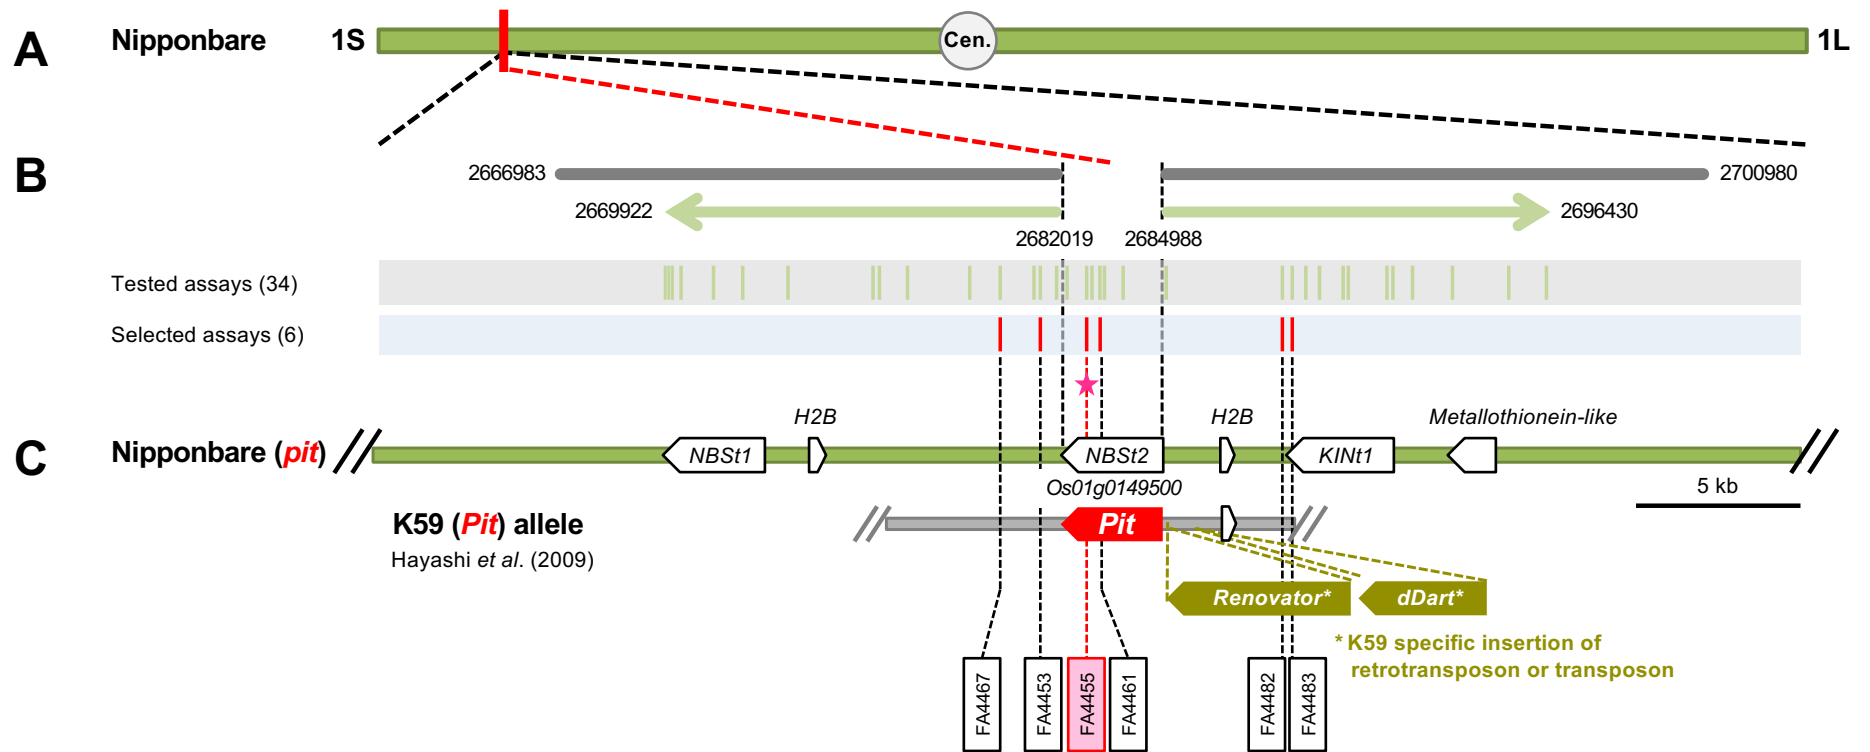

**Supplemental Fig. 1. SNP genotyping assays for *Pit* locus**

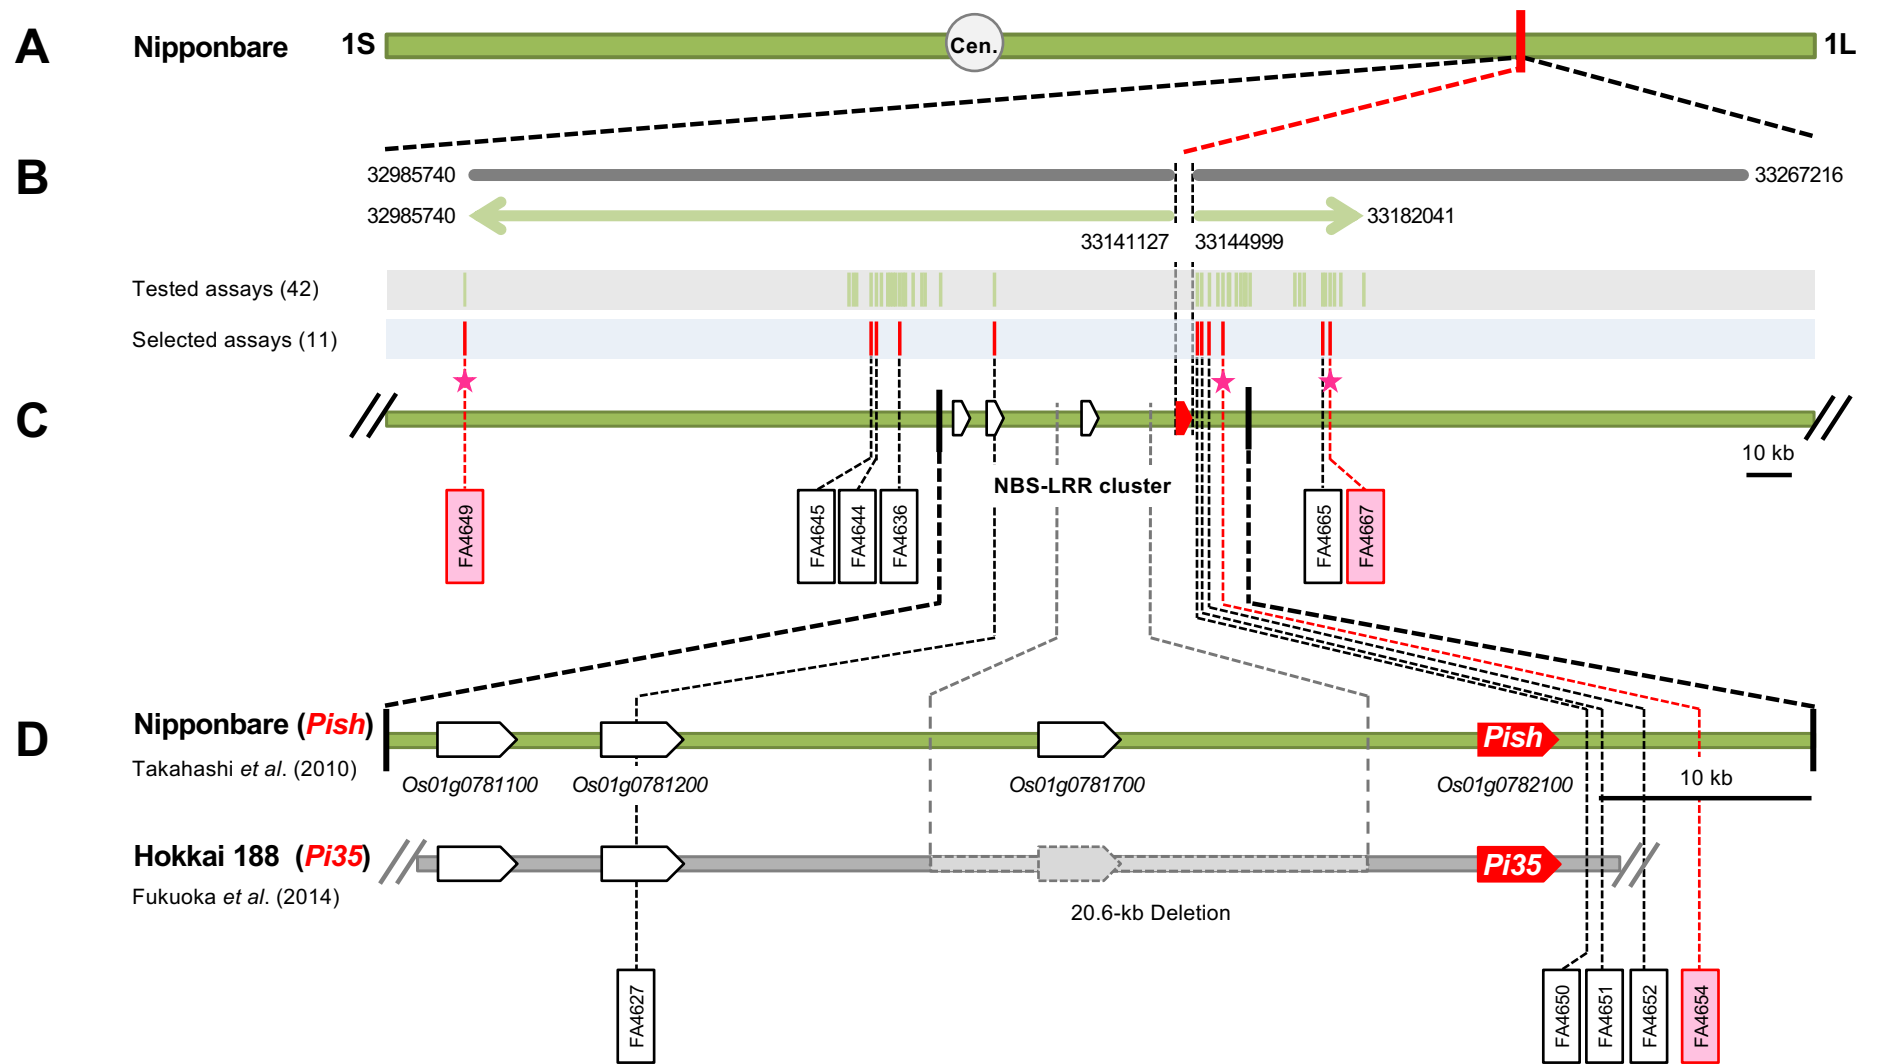

Supplemental Fig. 2. SNP genotyping assays for *Pish* locus

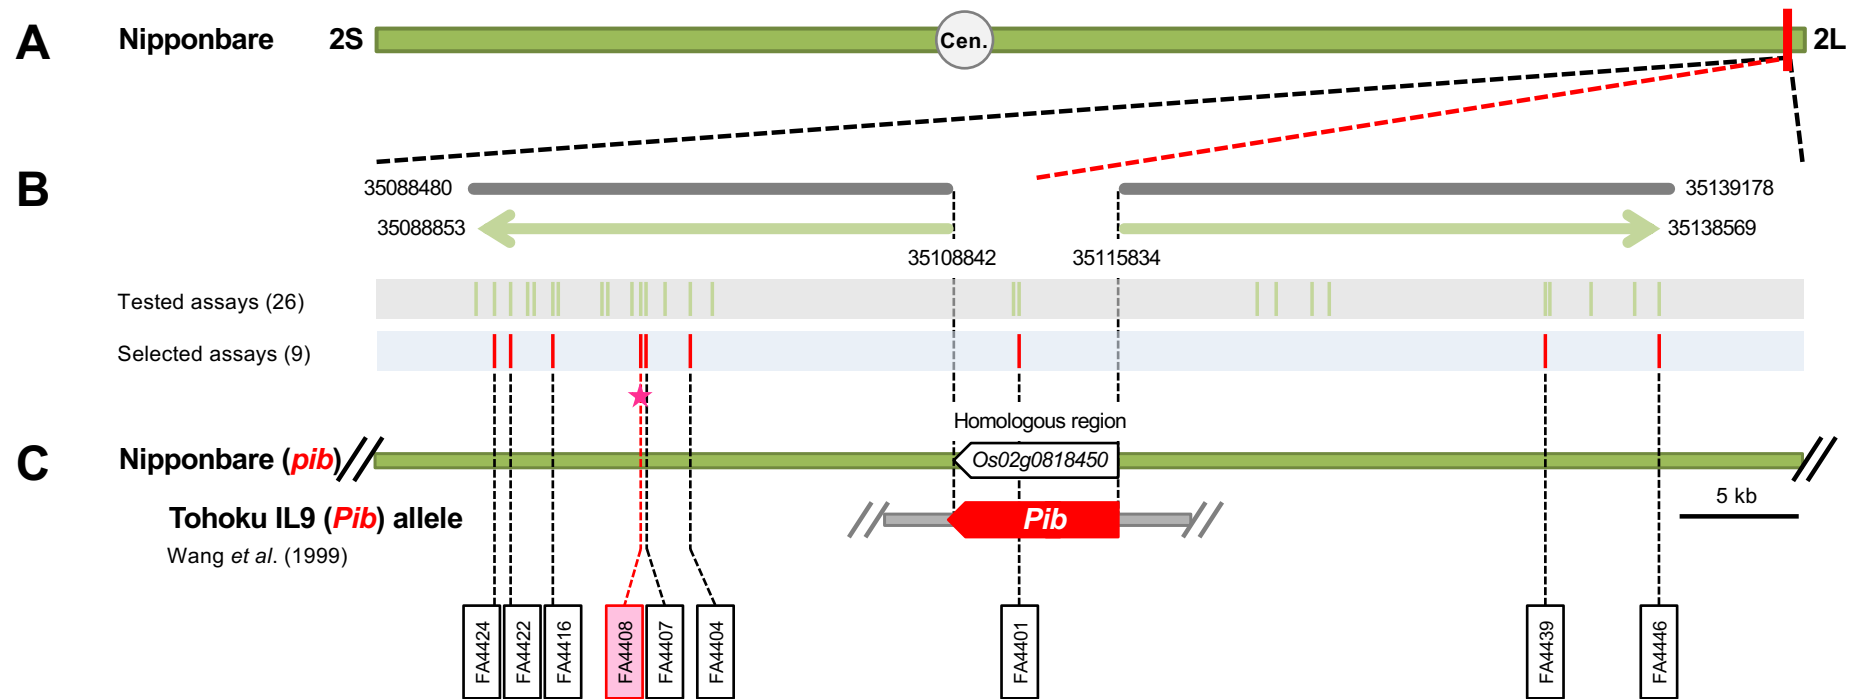

Supplemental Fig. 3. SNP genotyping assays for *Pib* locus

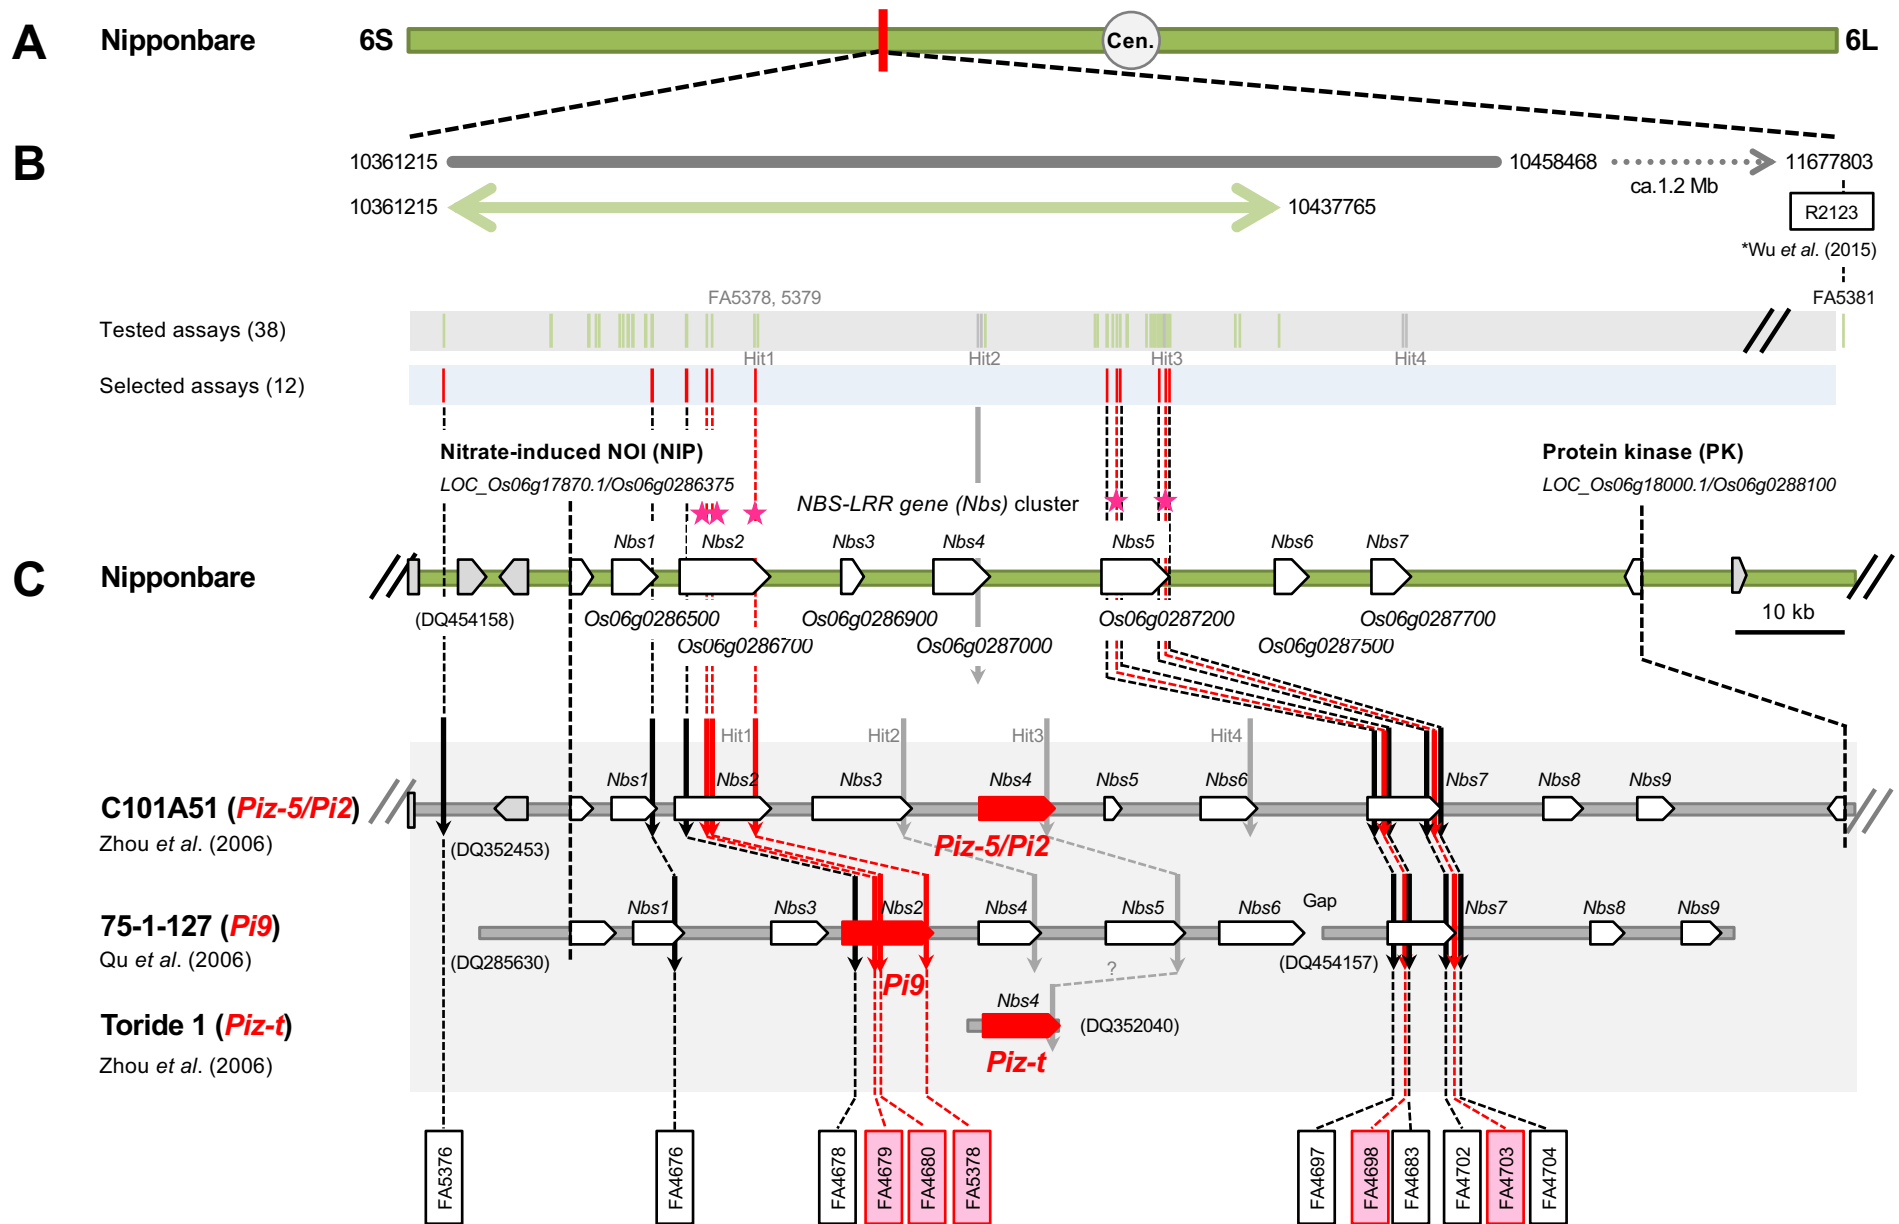

Supplemental Fig. 4. SNP genotyping assays for *Piz* locus

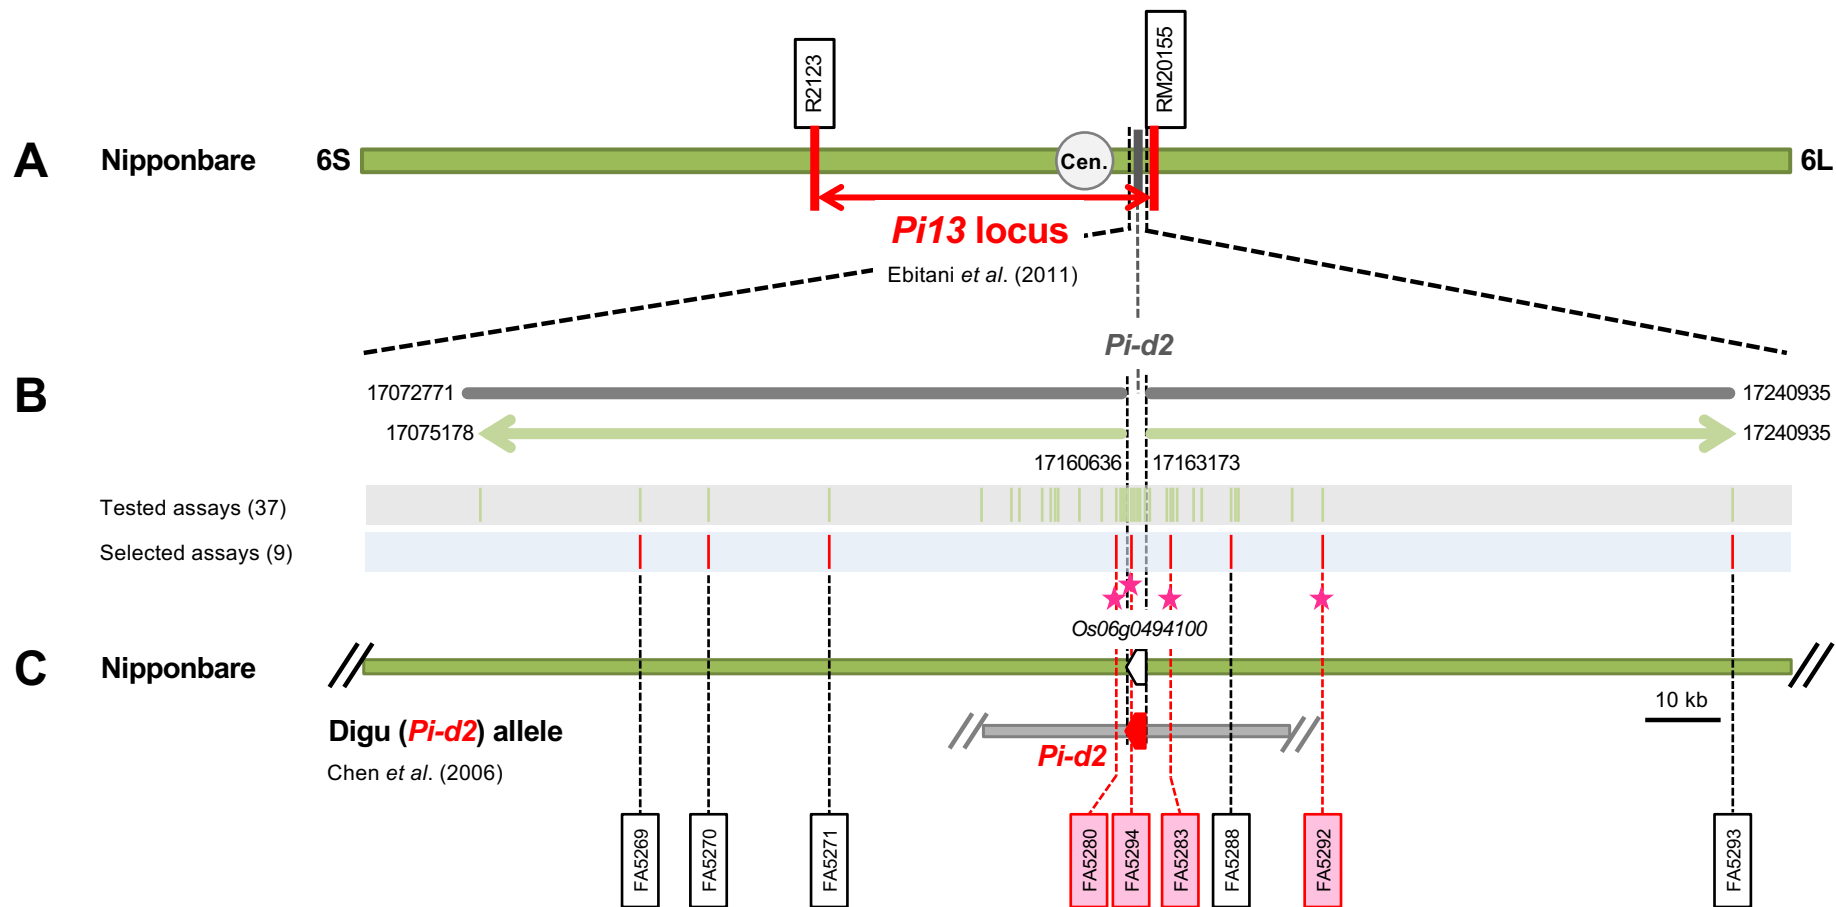

Supplemental Fig. 5. SNP genotyping assays for *Pi13* locus

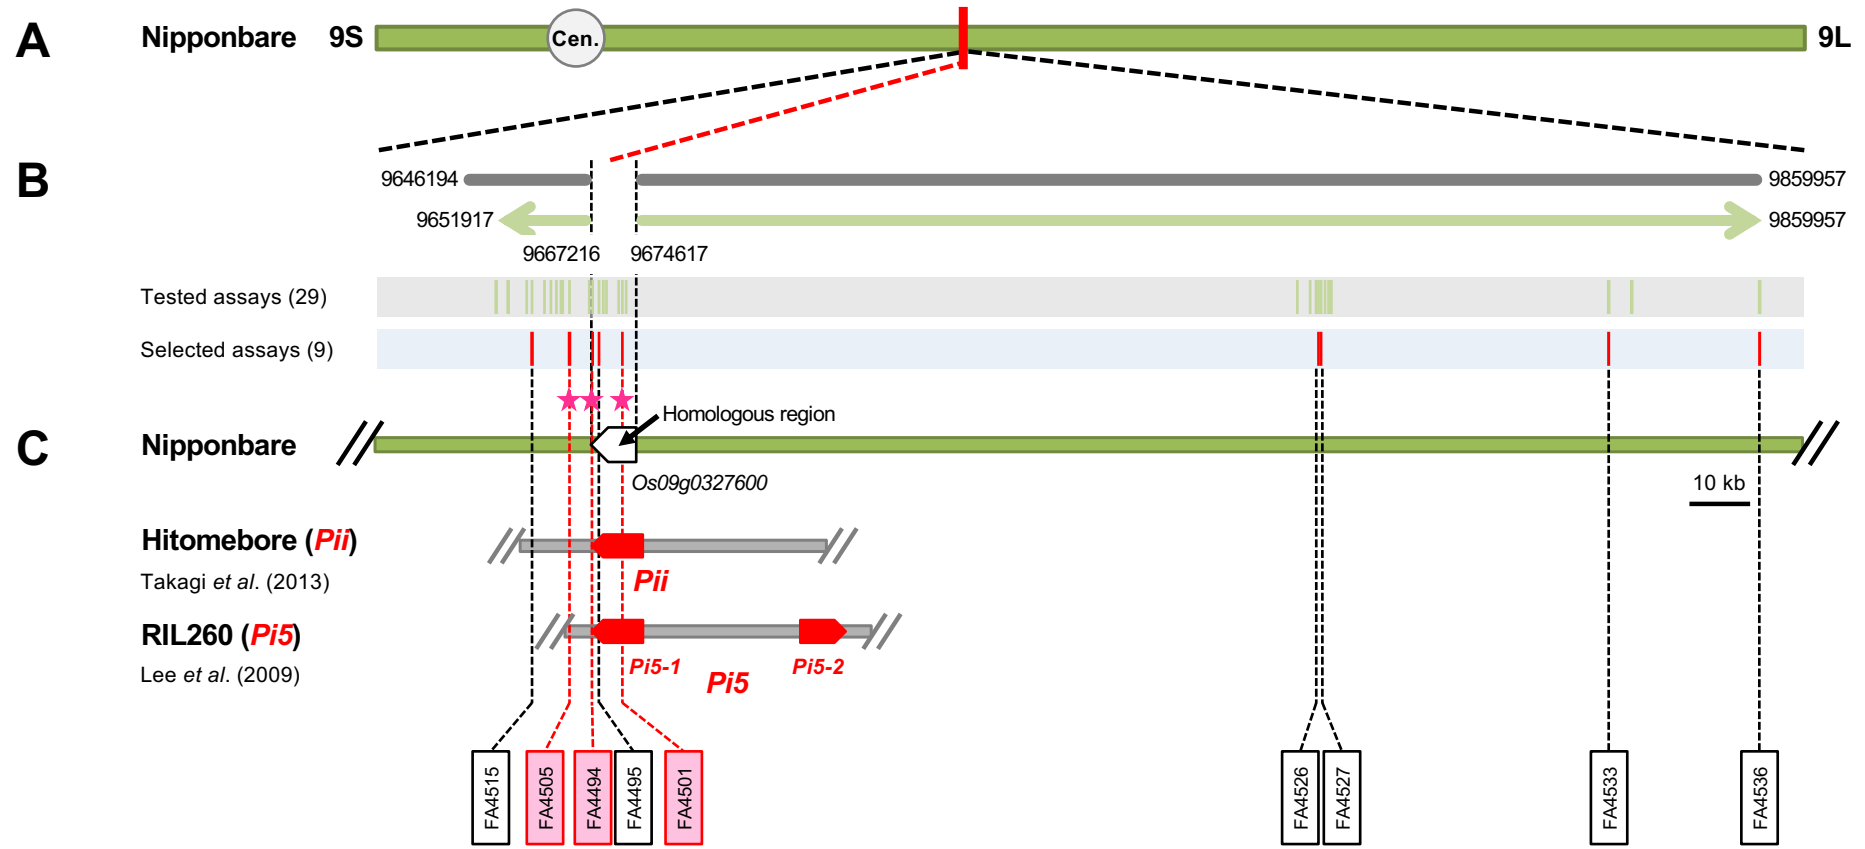

**Supplemental Fig. 6.** SNP genotyping assays for *Pii* locus

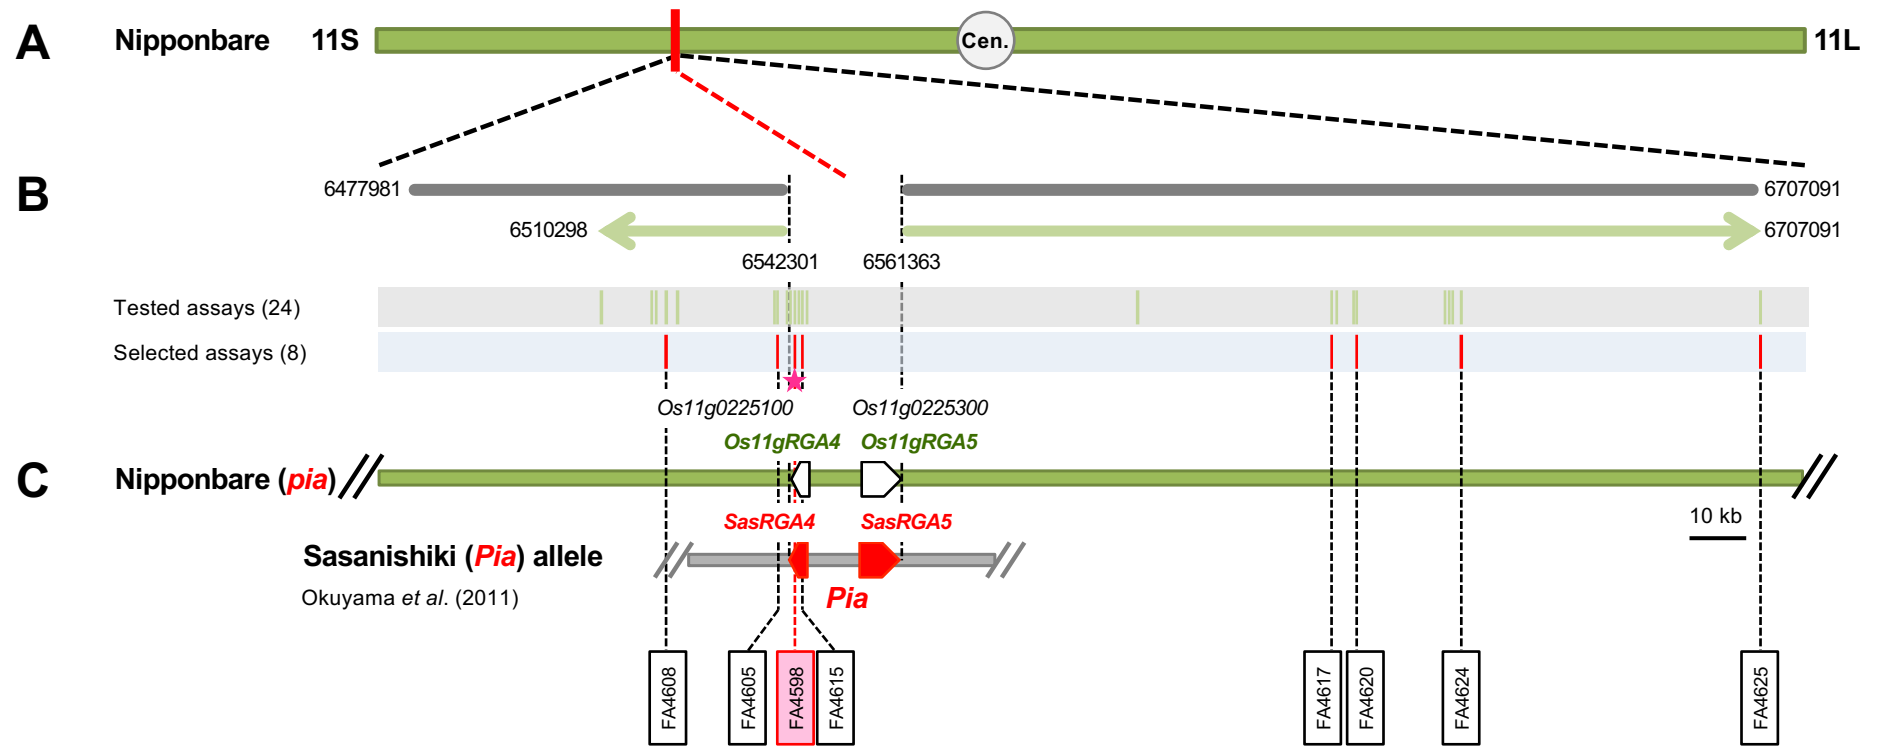

Supplemental Fig. 7. SNP genotyping assays for *Pia* locus



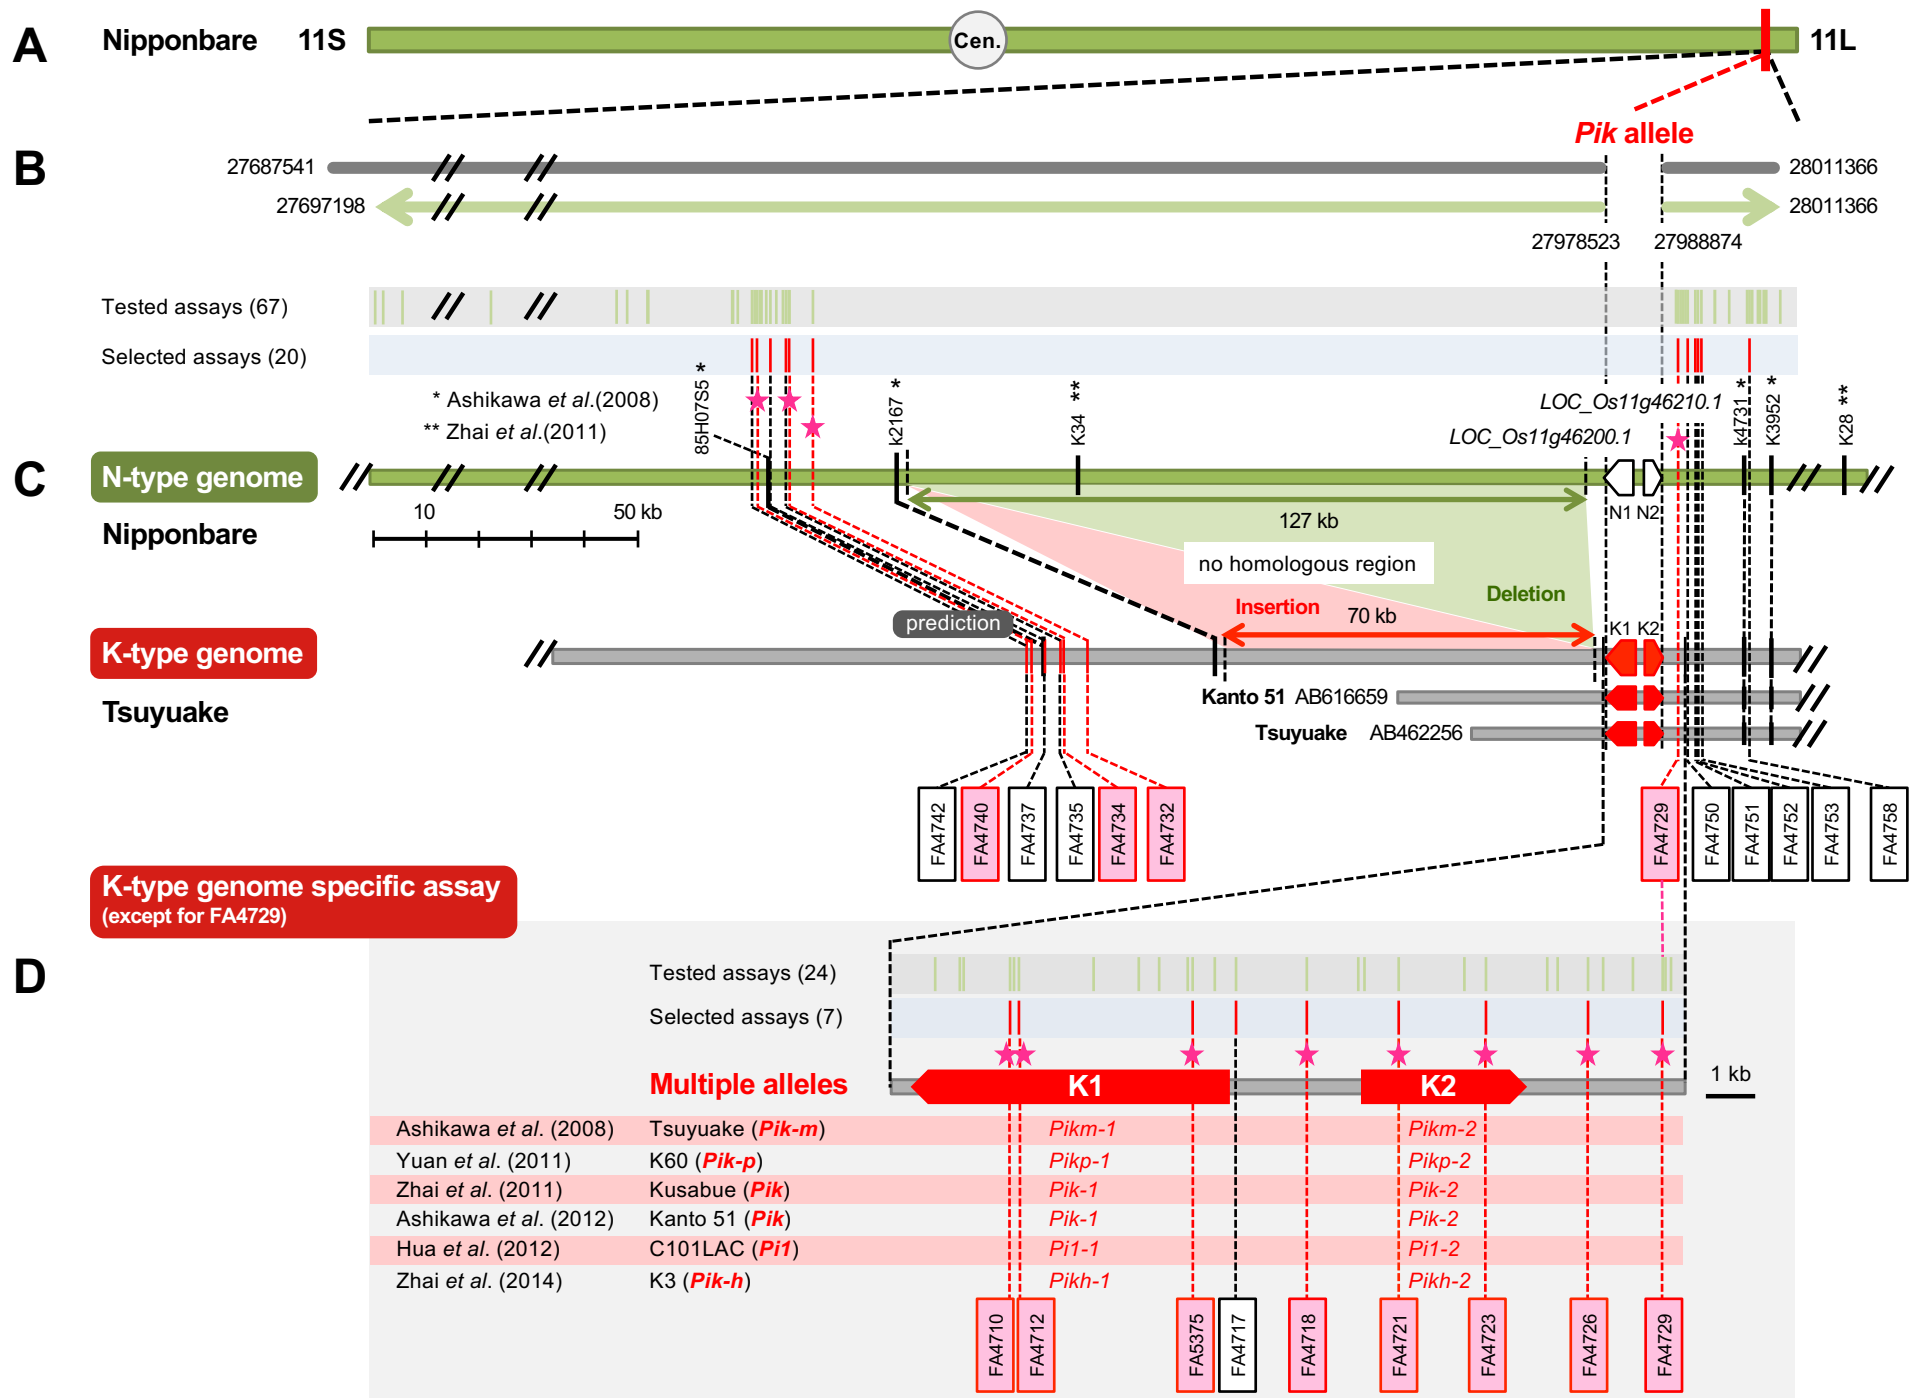

Supplemental Fig. 8. SNP genotyping assays for *Pik* locus

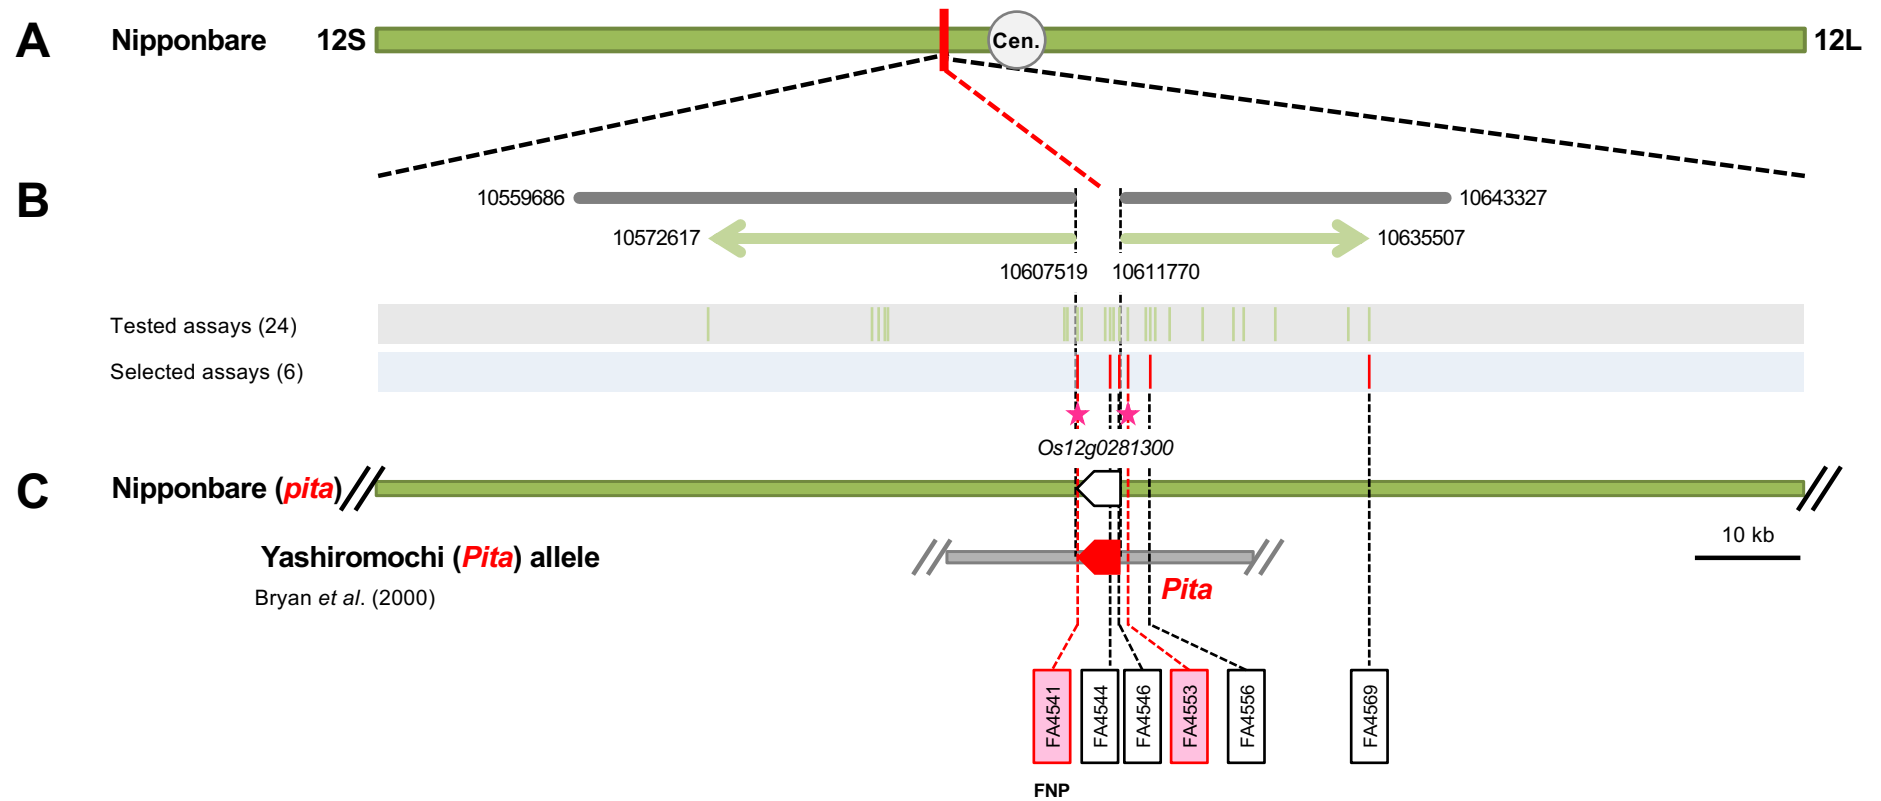

**Supplemental Fig. 9.** SNP genotyping assays for *Pita* locus

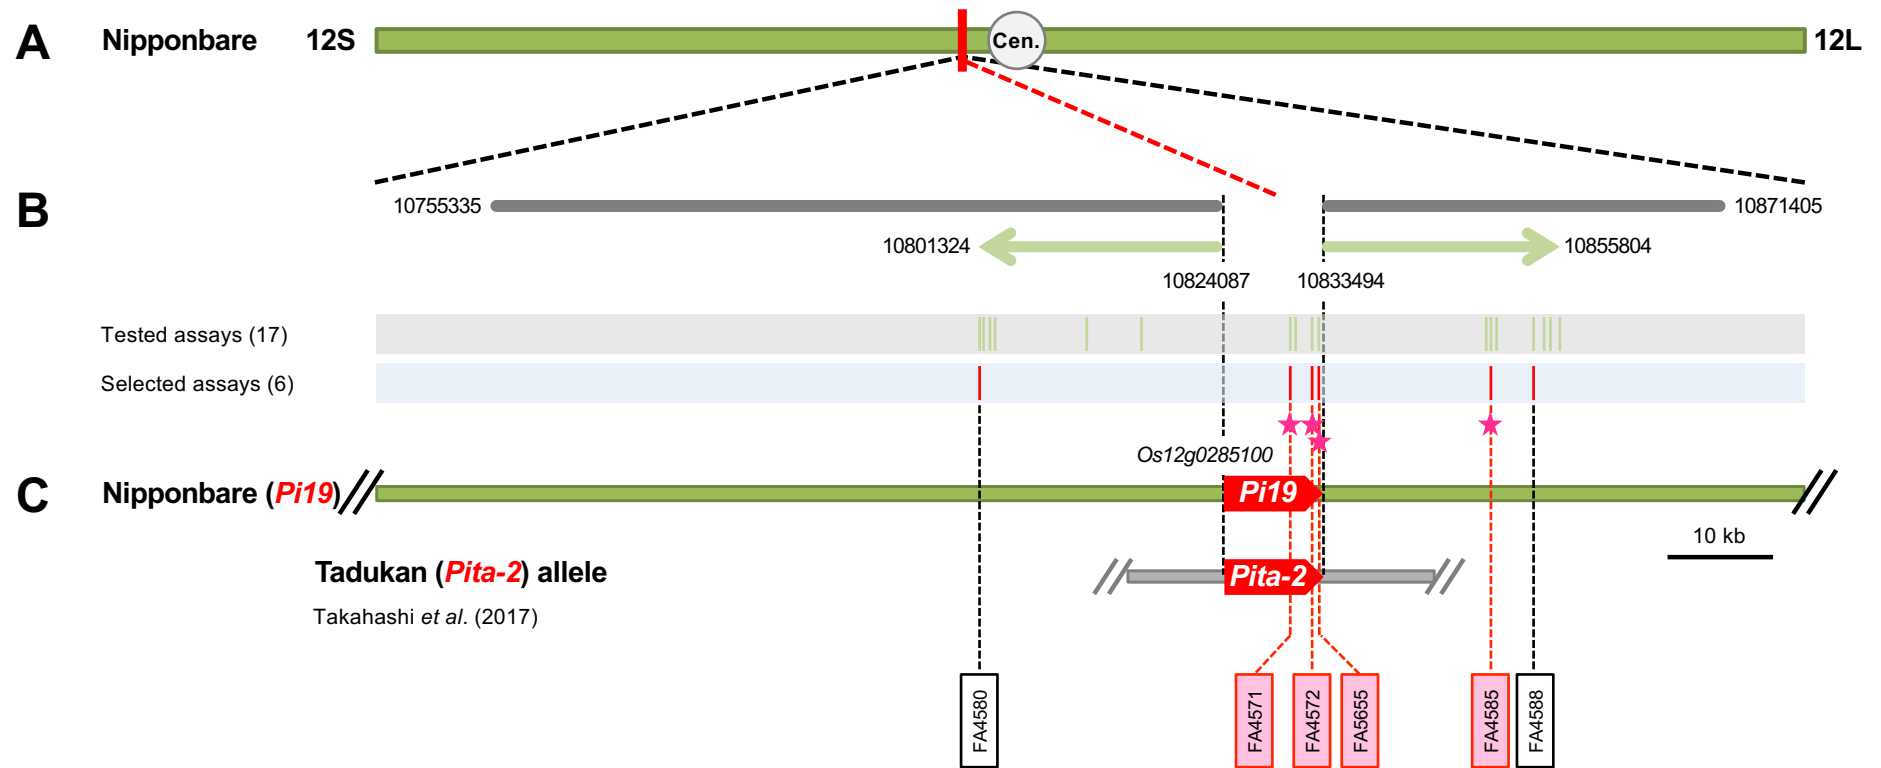

Supplemental Fig. 10. SNP genotyping assays for *Pita-2* locus

Legends for **Supplemental Fig. 11**. InDel marker set for each of the 10 loci.

(A) Genotypes obtained by using the PCR-based markers and SNP genotyping assays. ‘Nipponbare’, donors for respective resistance alleles, and varieties that represent haplotypes obtained by SNP genotyping were selected for each locus.

Genotype A, ‘Nipponbare’ type; B or C, genotypes that differ from ‘Nipponbare’ type; AB, a genotype with amplicons of the same size as those from ‘Nipponbare’ type and the other type; -, no amplicon. For the markers Pik-ID006, Pik-ID007, and Pik-ID010 to ID015 at the Pik locus, ‘Kusabue’ type was denoted as A because of no amplification in ‘Nipponbare’ (Supplemental Fig. 11-8A). The markers in red could distinguish between the resistance allele and other alleles; they consist of a total of 23 PCR-based markers (Table 5) and the “core set” of 35 SNP genotyping assays (Supplemental Table 4). The haplotype IDs are as shown in Supplemental Table 4. The genotypes are based on the results shown in Supplemental Table 4.

(B) Sizes of the amplicons obtained by using the selected PCR-based markers (also see Table 5 for details). The 20-bp ladder lane (Takara Bio Inc., Shiga, Japan), and sizes of two or three reference bands are shown on the left. Blue and red arrows indicate the expected band size for genotype A or B, respectively (see Supplemental Table 6).



**A**

| Sample No. | Cultivar/Line name | Target allele | SNP genotyping assays Haplotype ID | Marker | No. | IRGSP-1.0 | Chr. | InDel marker genotypes |            |            |            |            |            |            |            |          |          |            |            |            |            | SNP-haplotype |            |          |        |        |        |        |        |          |          |        |        |        |        |        |        |   |   |   |   |
|------------|--------------------|---------------|------------------------------------|--------|-----|-----------|------|------------------------|------------|------------|------------|------------|------------|------------|------------|----------|----------|------------|------------|------------|------------|---------------|------------|----------|--------|--------|--------|--------|--------|----------|----------|--------|--------|--------|--------|--------|--------|---|---|---|---|
|            |                    |               |                                    |        |     |           |      | Pish-ID001             | Pish-ID002 | Pish-ID003 | Pish-ID004 | Pish-ID005 | Pish-ID006 | Pish-ID007 | Pish-ID008 | 33141127 | 33144999 | Pish-ID009 | Pish-ID010 | Pish-ID011 | Pish-ID012 | Pish-ID013    | Pish-ID014 | 33330985 | FA4649 | FA4645 | FA4644 | FA4636 | FA4627 | 33141127 | 33144999 | FA4650 | FA4651 | FA4652 | FA4654 | FA4665 | FA4667 |   |   |   |   |
| 1          | Aokei IL2          | Pi35          | Pish_H02                           | A      | A   | A         | A    | A                      | A          | A          | A          | A          | A          | A          | A          | A        | A        | A          | A          | A          | B          | A             | A          | A        | A      | A      | A      | A      | A      | A        | A        | A      | A      | A      | A      | A      | A      | B | B |   |   |
| 2          | Hokkai 188         | Pi35          | Pish_H02                           | A      | A   | A         | A    | A                      | A          | A          | A          | A          | A          | A          | A          | A        | A        | A          | A          | A          | B          | A             | A          | A        | A      | A      | A      | A      | A      | A        | A        | A      | A      | A      | A      | A      | A      | B | B |   |   |
| 3          | Nipponbare         | Pish          | Pish_H01                           | A      | A   | A         | A    | A                      | A          | A          | A          | A          | A          | A          | A          | A        | A        | A          | A          | A          | A          | A             | A          | A        | A      | A      | A      | A      | A      | A        | A        | A      | A      | A      | A      | A      | A      | A | A |   |   |
| 4          | Koshihikari        | Pish          | Pish_H01                           | A      | A   | A         | A    | A                      | A          | A          | A          | A          | A          | A          | A          | A        | A        | A          | A          | A          | A          | A             | A          | A        | A      | A      | A      | A      | A      | A        | A        | A      | A      | A      | A      | A      | A      | A | A |   |   |
| 5          | Kimaze             | -             | Pish_H03                           | A      | A   | A         | A    | A                      | A          | A          | A          | A          | B          | B          |            |          |          |            |            |            | A          | A             | A          | A        | A      | A      | A      | A      | A      | A        | A        | A      | A      | A      | A      | A      | A      | A | A |   |   |
| 6          | Hoshinoyume        | -             | Pish_H03                           | A      | A   | A         | A    | A                      | A          | A          | B          | B          |            |            |            |          |          |            |            |            | A          | A             | A          | A        | A      | A      | A      | A      | A      | A        | A        | A      | A      | A      | A      | A      | A      | A | A |   |   |
| 7          | Owarihatamochi     | -             | Pish_H04                           | A      | A   | A         | A    | A                      | A          | A          | B          | B          |            |            |            |          |          |            |            |            | A          | A             | A          | A        | A      | A      | A      | A      | A      | A        | A        | A      | A      | A      | A      | A      | A      | A | A |   |   |
| 8          | Hokuriku 193       | -             | Pish_H07                           | A      | A   | B         | B    | B                      | A          | A          | A          | A          |            |            |            |          |          |            |            |            | B          | A             | B          | B        | B      | B      |        |        |        |          |          |        |        |        |        |        |        |   |   |   |   |
| 9          | Takanari           | -             | Pish_H07                           | A      | A   | B         | B    | B                      | A          | A          | A          | A          |            |            |            |          |          |            |            |            | B          | A             | B          | B        | B      | B      |        |        |        |          |          |        |        |        |        |        |        |   |   |   |   |
| 10         | Mochidawara        | -             | Pish_H06                           | B      | B   | B         | B    | A                      | B          | B          | B          |            |            |            |            |          |          |            |            |            | B          | A             | B          | B        | B      | B      |        |        |        |          |          |        |        |        |        |        |        |   |   |   |   |
| 11         | Hoshiaoba          | Pish          | Pish_H01                           | A      | A   | A         | A    | A                      | A          | A          | A          | A          |            |            |            |          |          |            |            |            | A          | A             | A          | A        | A      | A      | A      | A      | A      | A        | A        | A      | A      | A      | A      | A      | A      | A | A | A |   |
| 12         | Kasalath           | -             | Pish_H09                           | A      | A   | B         | B    | A                      | A          | A          | A          |            |            |            |            |          |          |            |            |            | A          | A             | A          | B        | B      | B      |        |        |        |          |          |        |        |        |        |        |        |   |   |   |   |
| 13         | IR 64              | -             | Pish_H07                           | A      | A   | B         | B    | B                      | A          | A          | A          | A          |            |            |            |          |          |            |            |            | B          | A             | B          | B        | B      | B      |        |        |        |          |          |        |        |        |        |        |        |   |   |   |   |
| 14         | Hoshiyutaka        | Pish          | Pish_H01                           | A      | A   | A         | A    | A                      | A          | A          | A          | A          |            |            |            |          |          |            |            |            | A          | A             | A          | A        | A      | A      | A      | A      | A      | A        | A        | A      | A      | A      | A      | A      | A      | A | A | A |   |
| 15         | Tachijobu          | -             | Pish_H03                           | A      | A   | A         | A    | A                      | A          | A          | B          | B          |            |            |            |          |          |            |            |            | A          | A             | A          | A        | A      | A      | A      | A      | A      | A        | A        | A      | A      | A      | A      | A      | A      | A | A | A | A |
| 16         | Momiroman          | Pish          | Pish_H01                           | A      | A   | A         | A    | A                      | A          | A          | A          | A          |            |            |            |          |          |            |            |            | A          | A             | A          | A        | A      | A      | A      | A      | A      | A        | A        | A      | A      | A      | A      | A      | A      | A | A | A |   |
| 17         | Fukuhibiki         | Pish          | Pish_H01                           | A      | A   | A         | A    | A                      | A          | A          | A          | A          |            |            |            |          |          |            |            |            | A          | A             | A          | A        | A      | A      | A      | A      | A      | A        | A        | A      | A      | A      | A      | A      | A      | A | A | A | A |
| 18         | Hanaechizen        | Pish          | Pish_H01                           | A      | A   | A         | A    | A                      | A          | A          | A          | A          |            |            |            |          |          |            |            |            | A          | A             | A          | A        | A      | A      | A      | A      | A      | A        | A        | A      | A      | A      | A      | A      | A      | A | A | A | A |
| 19         | Yumetoiro          | -             | Pish_H07                           | A      | A   | B         | B    | B                      | A          | A          | A          | A          |            |            |            |          |          |            |            |            | B          | A             | B          | B        | B      | B      |        |        |        |          |          |        |        |        |        |        |        |   |   |   |   |
| 20         | IR 24              | -             | Pish_H06                           | B      | B   | B         | B    | A                      | B          | B          | B          |            |            |            |            |          |          |            |            |            | B          | A             | B          | B        | B      | B      |        |        |        |          |          |        |        |        |        |        |        |   |   |   |   |
| 21         | Sasanishiki        | Pish          | Pish_H01                           | A      | A   | A         | A    | A                      | A          | A          | -          |            |            |            |            |          |          |            |            |            | A          | A             | A          | A        | A      | A      | A      | A      | A      | A        | A        | A      | A      | A      | A      | A      | A      | A | A | A |   |
| 22         | Guizhao 2          | -             | Pish_H06                           | B      | B   | B         | B    | A                      | B          | B          | B          |            |            |            |            |          |          |            |            |            | B          | A             | B          | B        | B      | B      |        |        |        |          |          |        |        |        |        |        |        |   |   |   |   |

**B**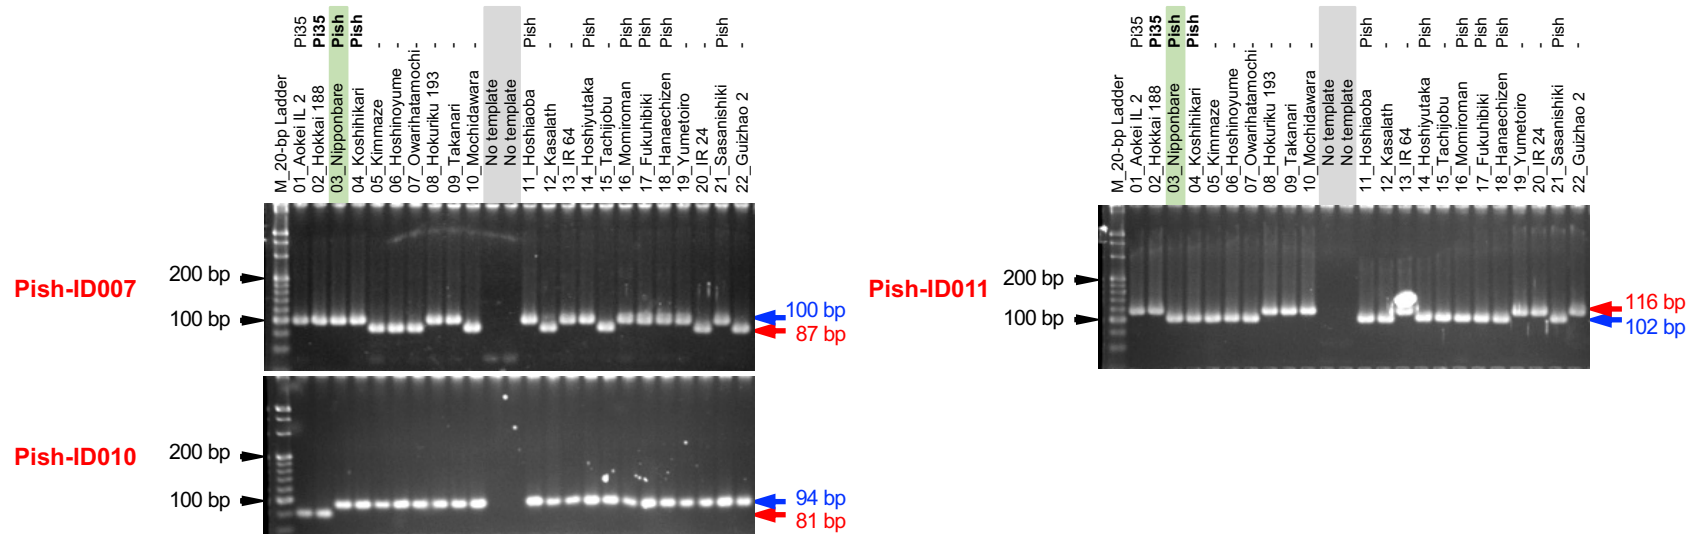Supplemental Fig. 11-2. InDel marker set for *Pish* locus

**A**

| Sample No. | Cultivar/Line name | Target allele | SNP genotyping assays Haplotype ID | InDel marker genotypes |                |                       |          |          |          |          |          |                         |          |          | SNP-haplotype |        |                       |        |        |        |        |        |                         |   |   |   |   |   |   |   |   |   |   |   |   |   |
|------------|--------------------|---------------|------------------------------------|------------------------|----------------|-----------------------|----------|----------|----------|----------|----------|-------------------------|----------|----------|---------------|--------|-----------------------|--------|--------|--------|--------|--------|-------------------------|---|---|---|---|---|---|---|---|---|---|---|---|---|
|            |                    |               |                                    | Marker No.             | IRGSP-1.0 Chr. | Pib_CDS_Upstream side |          |          |          |          |          | Pib_CDS_Downstream side |          |          |               |        | Pib_CDS_Upstream side |        |        |        |        |        | Pib_CDS_Downstream side |   |   |   |   |   |   |   |   |   |   |   |   |   |
|            |                    |               |                                    |                        |                | Pib-ID07              | Pib-ID08 | Pib-ID09 | Pib-ID10 | Pib-ID11 | Pib-ID12 | Pib-ID13                | Pib-ID14 | Pib-ID15 | FA4424        | FA4422 | FA4416                | FA4408 | FA4407 | FA4404 | FA4401 | FA4439 | FA4446                  |   |   |   |   |   |   |   |   |   |   |   |   |   |
| 1          | BL1                | <i>Pib</i>    | Pib_H01                            | A                      | A              | A                     | B        | B        | B        | B        | -        | B                       | B        | A        | B             | A      | B                     | A      | B      | A      | B      | A      | B                       | A | B | A | B | A | B | A | B | A | B | A | B |   |
| 2          | Fukuhibiki         | <i>Pib</i>    | Pib_H01                            | B                      | B              | A                     | A        | B        | B        | B        | -        | B                       | B        | A        | B             | A      | B                     | A      | B      | A      | B      | A      | B                       | A | B | A | B | A | B | A | B | A | B | A | B |   |
| 3          | Nipponbare         | -             | Pib_H02                            | A                      | A              | A                     | A        | A        | A        | A        | A        | A                       | A        | A        | A             | A      | A                     | A      | A      | A      | A      | A      | A                       | A | A | A | A | A | A | A | A | A | A | A | A |   |
| 4          | Koshihikari        | -             | Pib_H03                            | A                      | A              | A                     | A        | A        | A        | A        | A        | A                       | A        | A        | A             | A      | A                     | A      | A      | A      | A      | A      | A                       | A | A | A | A | A | A | A | A | A | A | A | A |   |
| 5          | Hoshiyutaka        | -             | Pib_H04                            | A                      | A              | B                     | A        | A        | A        | A        | B        | BC                      | C        | A        | A             | A      | A                     | A      | A      | A      | A      | A      | A                       | A | A | A | A | A | A | A | A | A | A | A | A |   |
| 6          | Hokuriku 193       | -             | Pib_H05                            | A                      | B              | A                     | A        | A        | A        | B        | B        | B                       | B        | B        | C             | A      | A                     | A      | A      | A      | A      | A      | A                       | A | A | A | A | A | A | A | A | A | A | A | A |   |
| 7          | Sasanishiki        | -             | Pib_H02                            | A                      | A              | A                     | A        | A        | A        | A        | A        | A                       | A        | A        | A             | A      | A                     | A      | A      | A      | A      | A      | A                       | A | A | A | A | A | A | A | A | A | A | A | A |   |
| 8          | Sasanishiki BL7    | <i>Pib</i>    | ND                                 | B                      | B              | A                     | A        | B        | B        | B        | -        | B                       | B        | A        | B             | A      | B                     | A      | B      | A      | B      | A      | B                       | A | B | A | B | A | B | A | B | A | B | A | B |   |
| 9          | Guizhao 2          | -             | Pib_H05                            | A                      | A              | B                     | A        | A        | A        | B        | B        | B                       | B        | B        | C             | A      | A                     | A      | A      | A      | A      | A      | A                       | A | A | A | A | A | A | A | A | A | A | A | A |   |
| 10         | Hoshinoyume        | -             | Pib_H03                            | A                      | A              | A                     | A        | A        | A        | A        | A        | A                       | A        | C        | A             | A      | A                     | A      | A      | A      | A      | A      | A                       | A | A | A | A | A | A | A | A | A | A | A | A |   |
| 11         | Momiroman          | <i>Pib</i>    | Pib_H01                            | B                      | B              | A                     | B        | B        | B        | B        | -        | B                       | B        | A        | B             | A      | B                     | A      | B      | A      | B      | A      | B                       | A | B | A | B | A | B | A | B | A | B | A | B |   |
| 12         | Takanari           | <i>Pib</i>    | Pib_H01                            | B                      | B              | A                     | B        | B        | B        | B        | -        | B                       | B        | A        | B             | A      | B                     | A      | B      | A      | B      | A      | B                       | A | B | A | B | A | B | A | B | A | B | A | B |   |
| 13         | Mochidawara        | <i>Pib</i>    | Pib_H01                            | B                      | B              | A                     | B        | B        | B        | B        | -        | B                       | B        | A        | B             | A      | B                     | A      | B      | A      | B      | A      | B                       | A | B | A | B | A | B | A | B | A | B | A | B |   |
| 14         | Kusahonami         | -             | Pib_H04                            | A                      | A              | B                     | A        | A        | A        | B        | B        | BC                      | C        | A        | A             | A      | A                     | A      | A      | A      | A      | A      | A                       | A | A | A | A | A | A | A | A | A | A | A | A | A |
| 15         | Leafstar           | -             | Pib_H04                            | A                      | A              | B                     | A        | A        | A        | B        | B        | BC                      | C        | A        | A             | A      | A                     | A      | A      | A      | A      | A      | A                       | A | A | A | A | A | A | A | A | A | A | A | A | A |
| 16         | Owarihatamochi     | -             | Pib_H03                            | A                      | A              | A                     | A        | A        | A        | A        | A        | A                       | C        | A        | A             | A      | A                     | A      | A      | A      | A      | A      | A                       | A | A | A | A | A | A | A | A | A | A | A | A | A |
| 17         | Hoshiaoba          | <i>Pib</i>    | Pib_H01                            | B                      | B              | A                     | B        | B        | B        | B        | -        | B                       | B        | A        | B             | A      | B                     | A      | B      | A      | B      | A      | B                       | A | B | A | B | A | B | A | B | A | B | A | B |   |
| 18         | Kasalath           | -             | Pib_H08                            | A                      | A              | B                     | A        | A        | A        | B        | B        | A                       | A        | B        | C             | A      | A                     | A      | A      | A      | A      | A      | A                       | A | A | A | A | A | A | A | A | A | A | A | A | A |
| 19         | IR 64              | <i>Pib</i>    | Pib_H01                            | B                      | B              | A                     | B        | B        | B        | B        | -        | B                       | B        | B        | B             | B      | B                     | B      | B      | B      | B      | B      | B                       | B | B | B | B | B | B | B | B | B | B | B | B | B |
| 20         | Tachijobu          | -             | Pib_H02                            | A                      | A              | A                     | A        | A        | A        | A        | A        | A                       | A        | A        | A             | A      | A                     | A      | A      | A      | A      | A      | A                       | A | A | A | A | A | A | A | A | A | A | A | A | A |
| 21         | Hanaechizen        | -             | Pib_H02                            | A                      | A              | A                     | A        | A        | A        | A        | A        | A                       | A        | A        | A             | A      | A                     | A      | A      | A      | A      | A      | A                       | A | A | A | A | A | A | A | A | A | A | A | A | A |
| 22         | Yumetoiro          | <i>Pib</i>    | Pib_H01                            | B                      | B              | A                     | B        | B        | B        | B        | -        | B                       | B        | A        | B             | A      | B                     | A      | B      | A      | B      | A      | B                       | A | B | A | B | A | B | A | B | A | B | A | B |   |
| 23         | IR 24              | <i>Pib</i>    | Pib_H01                            | B                      | B              | A                     | B        | B        | B        | B        | -        | B                       | B        | A        | B             | A      | B                     | A      | B      | A      | B      | A      | B                       | A | B | A | B | A | B | A | B | A | B | A | B |   |

**B**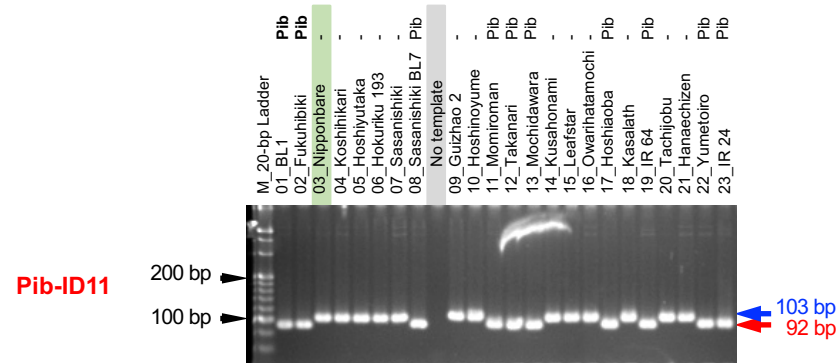

Supplemental Fig. 11-3. InDel marker set for *Pib* locus







**A**

| Sample No. | Cultivar/Line name | Target allele  | Haplotype ID | InDel marker genotypes |                |          |          |          |          |          |          |          |          |          |          |          | SNP-haplotype |          |        |        |        |        |        |        |        |        |
|------------|--------------------|----------------|--------------|------------------------|----------------|----------|----------|----------|----------|----------|----------|----------|----------|----------|----------|----------|---------------|----------|--------|--------|--------|--------|--------|--------|--------|--------|
|            |                    |                |              | Marker No.             | IRGSP-1.0 Chr. | Pii-ID02 | Pii-ID01 | Pii-ID04 | Pii-ID18 | Pii-ID07 | Pii-ID19 | Pii-ID20 | Pii-ID21 | Pii-ID22 | Pii-ID23 | Pii-ID24 | Pii-ID25      | Pii-ID26 | FA4515 | FA4505 | FA4494 | FA4495 | FA4501 | FA4526 | FA4527 | FA4533 |
| 1          | Fujisaka 5         | <i>Pii</i>     | Pii_H01-1    |                        |                | B        | B        | B        | B        | B        | B        | B        | B        | B        | B        | B        | B             | A        | B      | A      | B      | B      | B      | B      | B      | B      |
| 2          | Hitomebore         | <i>Pii</i>     | Pii_H01-1    |                        |                | B        | B        | B        | B        | B        | B        | B        | B        | B        | B        | B        | B             | A        | B      | A      | B      | B      | B      | B      | B      | B      |
| 3          | Nerica 1           | <i>Pii</i>     | Pii_H01-2    |                        |                | A        | A        | A        | B        | B        | B        | B        | B        | B        | B        | B        | B             | A        | B      | A      | B      | B      | B      | B      | B      | B      |
| 4          | IRBL5-M[LT]        | <i>Pi5</i>     | Pii_H02      |                        |                | B        | B        | B        | B        | B        | B        | B        | B        | B        | B        | B        | B             | B        | B      | B      | A      | B      | B      | B      | B      | B      |
| 5          | Guizhao 2          | <i>Pi5/Pi3</i> | Pii_H02      |                        |                | B        | B        | B        | B        | B        | B        | B        | B        | B        | B        | B        | B             | B        | B      | B      | A      | B      | B      | B      | B      | B      |
| 6          | IRBL3-CP4[LT]      | <i>Pi3</i>     | Pii_H02      |                        |                | B        | B        | B        | B        | B        | B        | B        | B        | B        | B        | B        | B             | B        | B      | B      | A      | B      | B      | B      | B      | B      |
| 7          | Momiroman          | -              | Pii_H03      |                        |                | A        | A        | A        | A        | A        | A        | A        | A        | A        | A        | A        | A             | A        | A      | A      | A      | A      | A      | A      | A      | A      |
| 8          | Hokuriku 193       | <i>Pi5/Pi3</i> | Pii_H02      |                        |                | B        | B        | B        | B        | B        | B        | B        | B        | B        | B        | B        | B             | B        | B      | B      | A      | B      | B      | B      | B      | B      |
| 9          | Mochidawara        | <i>Pi5/Pi3</i> | Pii_H02      |                        |                | B        | B        | B        | B        | B        | B        | B        | B        | B        | B        | B        | B             | B        | B      | B      | A      | B      | B      | B      | B      | B      |
| 10         | Nipponbare         | -              | Pii_H03      |                        |                | A        | A        | A        | A        | A        | A        | A        | A        | A        | A        | A        | A             | A        | A      | A      | A      | A      | A      | A      | A      | A      |
| 11         | Koshihikari        | -              | Pii_H03      |                        |                | A        | A        | A        | A        | A        | A        | A        | A        | A        | A        | A        | A             | A        | A      | A      | A      | A      | A      | A      | A      | A      |
| 12         | Takanari           | -              | Pii_H04      |                        |                | A        | A        | A        | A        | A        | A        | A        | A        | A        | A        | A        | A             | A        | A      | A      | A      | A      | A      | A      | A      | A      |
| 13         | Owarihatamochi     | -              | Pii_H06      |                        |                | A        | A        | A        | A        | A        | A        | A        | A        | A        | A        | A        | A             | A        | A      | A      | A      | A      | A      | A      | A      | A      |
| 14         | Fukuhibiki         | -              | Pii_H03      |                        |                | A        | A        | A        | A        | A        | A        | A        | A        | A        | A        | A        | A             | A        | A      | A      | A      | A      | A      | A      | A      | A      |
| 15         | Hoshinoyume        | <i>Pii</i>     | Pii_H01-1    |                        |                | B        | B        | B        | B        | B        | B        | B        | B        | B        | B        | B        | B             | A        | B      | A      | B      | B      | B      | B      | B      | B      |
| 16         | Hoshiyutaka        | <i>Pii</i>     | Pii_H01-2    |                        |                | A        | A        | A        | B        | B        | B        | B        | B        | B        | B        | B        | B             | A        | B      | A      | B      | B      | B      | B      | B      | B      |
| 17         | IR 64              | -              | Pii_H04      |                        |                | A        | A        | A        | A        | A        | A        | A        | A        | A        | A        | A        | A             | A        | A      | A      | A      | A      | A      | A      | A      | A      |
| 18         | Hoshiaoba          | -              | Pii_H03      |                        |                | A        | A        | A        | A        | A        | A        | A        | A        | A        | A        | A        | A             | A        | A      | A      | A      | A      | A      | A      | A      | A      |
| 19         | Kasalath           | -              | Pii_H08      |                        |                | B        | B        | B        | B        | C        | C        | C        | C        | C        | C        | C        | C             | A        | A      | A      | A      | A      | A      | A      | A      | A      |
| 20         | Yumetoiro          | -              | Pii_H09      |                        |                | B        | B        | B        | A        | C        | C        | C        | C        | C        | C        | C        | C             | A        | A      | A      | A      | A      | A      | A      | A      | A      |
| 21         | IR 24              | -              | Pii_H04      |                        |                | A        | A        | A        | A        | A        | A        | A        | A        | A        | A        | A        | A             | A        | A      | A      | A      | A      | A      | A      | A      | A      |
| 22         | Sasanishiki        | -              | Pii_H03      |                        |                | A        | A        | A        | A        | A        | A        | A        | A        | A        | A        | A        | A             | A        | A      | A      | A      | A      | A      | A      | A      | A      |
| 23         | Sasanishiki BL8    | <i>Pii</i>     | ND           |                        |                | B        | B        | B        | B        | B        | B        | B        | B        | B        | B        | B        | B             | A        | B      | A      | B      | B      | B      | B      | B      | B      |

**B**

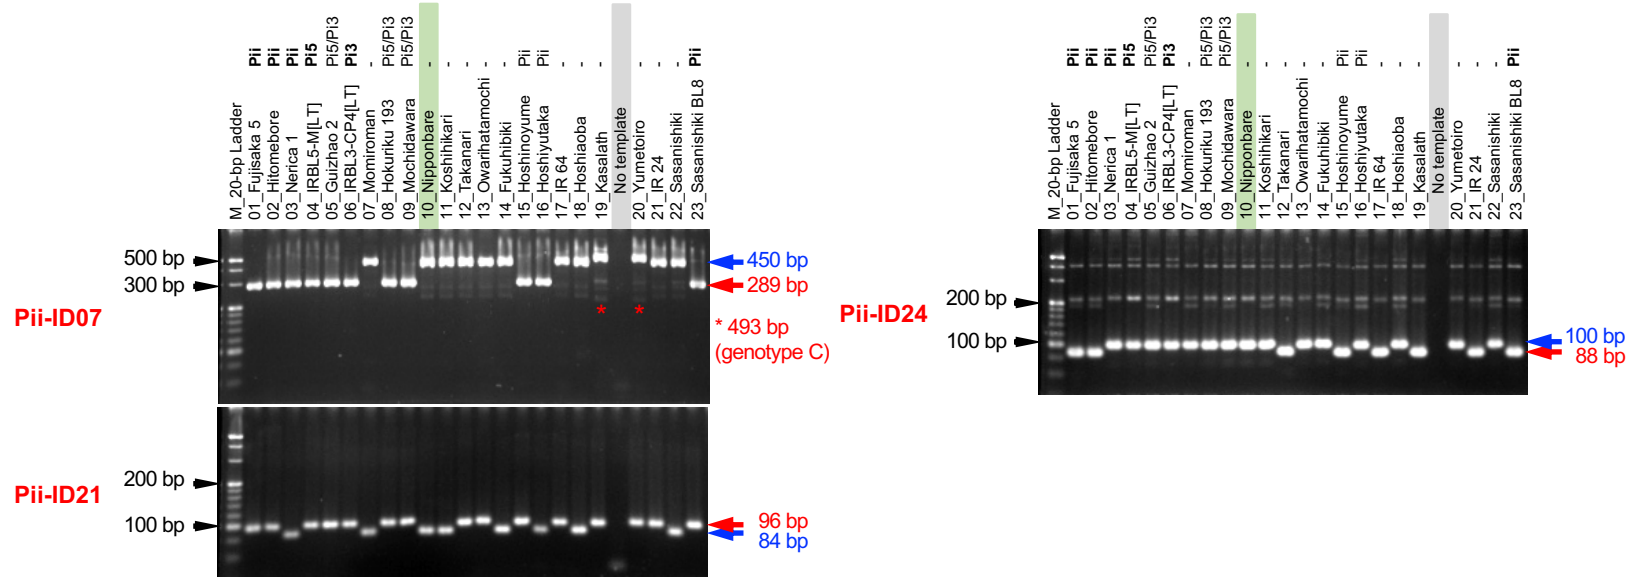

Supplemental Fig. 11-6. InDel marker set for *Pii* locus

**A**

| Sample No. | Cultivar/Line name | Target allele | SNP genotyping assays Haplotype ID | InDel marker genotypes |           |         |    |          |            |         |    |          |          |         |    | SNP-haplotype |        |         |        |            |        |         |        |          |        |         |        |        |        |         |        |        |   |         |    |        |   |         |    |        |   |         |    |        |   |         |    |        |   |         |    |        |   |         |    |        |   |         |    |
|------------|--------------------|---------------|------------------------------------|------------------------|-----------|---------|----|----------|------------|---------|----|----------|----------|---------|----|---------------|--------|---------|--------|------------|--------|---------|--------|----------|--------|---------|--------|--------|--------|---------|--------|--------|---|---------|----|--------|---|---------|----|--------|---|---------|----|--------|---|---------|----|--------|---|---------|----|--------|---|---------|----|--------|---|---------|----|
|            |                    |               |                                    | Chr. 11                |           |         |    |          |            |         |    |          |          |         |    |               |        |         |        |            |        |         |        |          |        |         |        |        |        |         |        |        |   |         |    |        |   |         |    |        |   |         |    |        |   |         |    |        |   |         |    |        |   |         |    |        |   |         |    |
|            |                    |               |                                    | Marker No.             | IRGSP-1.0 |         |    |          | Pia-ID01_2 |         |    |          | Pia-ID06 |         |    |               | FA4608 |         | FA4605 |            | FA4598 |         | FA4615 |          | FA4617 |         | FA4620 |        | FA4624 |         | FA4625 |        |   |         |    |        |   |         |    |        |   |         |    |        |   |         |    |        |   |         |    |        |   |         |    |        |   |         |    |
| 1          | Aichiasahi         | <i>Pia</i>    | Pia_H01-1                          | Pia-ID02               | 1         | 6375786 | 11 | Pia-ID03 | 2          | 6400787 | 11 | Pia-ID04 | 3        | 6522517 | 11 | Pia-ID05      | 4      | 6523786 | 11     | Pia-ID01_2 | 5      | 6544602 | 11     | Pia-ID06 | 6      | 6562152 | 11     | FA4608 | 1      | 6521353 | 11     | FA4605 | 2 | 6540957 | 11 | FA4598 | 3 | 6543100 | 11 | FA4615 | 4 | 6544401 | 11 | FA4617 | 5 | 6634911 | 11 | FA4620 | 6 | 6638905 | 11 | FA4624 | 7 | 6656541 | 11 | FA4625 | 8 | 6707030 | 11 |
| 2          | Sasanishiki        | <i>Pia</i>    | Pia_H01-1                          | A                      | A         | B       | B  | A        | A          | B       | B  | A        | A        | B       | B  | B             | B      | -       | -      | B          | A      | -       | -      | B        | A      | -       | -      | B      | A      | -       | -      | B      | A | -       | -  | B      | A | -       | -  | B      | A | -       | -  |        |   |         |    |        |   |         |    |        |   |         |    |        |   |         |    |
| 3          | Nipponbare         | -             | Pia_H02                            | A                      | A         | A       | A  | A        | A          | A       | A  | A        | A        | A       | A  | A             | A      | A       | A      | A          | A      | A       | A      | A        | A      | A       | A      | A      | A      | A       | A      | A      | A | A       | A  | A      | A | A       | A  | A      | A | A       | A  |        |   |         |    |        |   |         |    |        |   |         |    |        |   |         |    |
| 4          | Koshihikari        | -             | Pia_H03                            | A                      | A         | A       | A  | A        | A          | A       | A  | A        | A        | A       | A  | A             | A      | A       | A      | A          | A      | A       | A      | A        | A      | A       | A      | A      | A      | A       | A      | A      | A | A       | A  | A      | A | A       | A  | A      | A | A       | A  |        |   |         |    |        |   |         |    |        |   |         |    |        |   |         |    |
| 5          | Hitomebore         | -             | Pia_H03                            | A                      | A         | A       | A  | A        | A          | A       | A  | A        | A        | A       | A  | A             | A      | A       | A      | A          | A      | A       | A      | A        | A      | A       | A      | A      | A      | A       | A      | A      | A | A       | A  | A      | A | A       | A  | A      | A | A       | A  |        |   |         |    |        |   |         |    |        |   |         |    |        |   |         |    |
| 6          | Owarihatamochi     | -             | Pia_H06                            | A                      | A         | A       | A  | A        | A          | A       | A  | A        | A        | A       | A  | A             | A      | A       | A      | A          | A      | A       | A      | A        | A      | A       | A      | A      | A      | A       | A      | A      | A | A       | A  | A      | A | A       | A  | A      | A | A       | A  |        |   |         |    |        |   |         |    |        |   |         |    |        |   |         |    |
| 7          | Hokuriku 193       | <i>Pia</i>    | Pia_H04                            | B                      | B         | A       | B  | B        | B          | A       | B  | B        | B        | A       | B  | B             | B      | A       | B      | A          | B      | -       | -      | A        | B      | -       | -      | B      | A      | -       | -      | A      | B | -       | -  | A      | B | -       | -  | A      | B | -       | -  |        |   |         |    |        |   |         |    |        |   |         |    |        |   |         |    |
| 8          | Takanari           | <i>Pia</i>    | Pia_H04                            | B                      | B         | A       | B  | B        | B          | A       | B  | B        | B        | A       | B  | B             | B      | A       | B      | B          | B      | A       | B      | B        | B      | A       | B      | B      | B      | A       | B      | B      | B | A       | B  | B      | B | A       | B  | B      | B | A       | B  |        |   |         |    |        |   |         |    |        |   |         |    |        |   |         |    |
| 9          | Mochidawara        | <i>Pia</i>    | Pia_H04                            | B                      | B         | A       | B  | B        | B          | A       | B  | B        | B        | A       | B  | B             | B      | A       | B      | B          | B      | A       | B      | B        | B      | A       | B      | B      | B      | A       | B      | B      | B | A       | B  | B      | B | A       | B  | B      | B | A       | B  |        |   |         |    |        |   |         |    |        |   |         |    |        |   |         |    |
| 10         | Hoshinoyume        | <i>Pia</i>    | Pia_H01-2                          | A                      | A         | B       | B  | A        | A          | B       | B  | A        | A        | B       | B  | A             | A      | B       | B      | B          | B      | -       | -      | B        | B      | -       | -      | B      | B      | -       | -      | B      | B | -       | -  | B      | B | -       | -  | B      | B | -       | -  |        |   |         |    |        |   |         |    |        |   |         |    |        |   |         |    |
| 11         | Ochikara           | <i>Pia</i>    | Pia_H01-2                          | A                      | A         | B       | B  | A        | A          | B       | B  | A        | A        | B       | B  | A             | A      | B       | B      | B          | B      | -       | -      | B        | B      | -       | -      | B      | B      | -       | -      | B      | B | -       | -  | B      | B | -       | -  | B      | B | -       | -  |        |   |         |    |        |   |         |    |        |   |         |    |        |   |         |    |
| 12         | Nishiaoba          | <i>Pia</i>    | Pia_H01-2                          | A                      | A         | B       | B  | A        | A          | B       | B  | A        | A        | B       | B  | A             | A      | B       | B      | B          | B      | -       | -      | B        | B      | -       | -      | B      | B      | -       | -      | B      | B | -       | -  | B      | B | -       | -  | B      | B | -       | -  |        |   |         |    |        |   |         |    |        |   |         |    |        |   |         |    |
| 13         | Fukuhibiki         | <i>Pia</i>    | Pia_H01-1                          | A                      | A         | B       | B  | A        | A          | B       | B  | A        | A        | B       | B  | A             | A      | B       | B      | B          | B      | -       | -      | B        | B      | -       | -      | B      | B      | -       | -      | B      | B | -       | -  | B      | B | -       | -  | B      | B | -       | -  |        |   |         |    |        |   |         |    |        |   |         |    |        |   |         |    |
| 14         | Momiroman          | <i>Pia</i>    | Pia_H01-1                          | A                      | A         | B       | B  | A        | A          | B       | B  | A        | A        | B       | B  | A             | A      | B       | B      | B          | B      | -       | -      | B        | B      | -       | -      | B      | B      | -       | -      | B      | B | -       | -  | B      | B | -       | -  | B      | B | -       | -  |        |   |         |    |        |   |         |    |        |   |         |    |        |   |         |    |
| 15         | Kusahonami         | -             | Pia_H03                            | A                      | A         | A       | A  | A        | A          | A       | A  | A        | A        | A       | A  | A             | A      | A       | A      | A          | A      | A       | A      | A        | A      | A       | A      | A      | A      | A       | A      | A      | A | A       | A  | A      | A | A       | A  | A      | A | A       | A  | A      | A | A       | A  |        |   |         |    |        |   |         |    |        |   |         |    |
| 16         | Hoshiyutaka        | -             | Pia_H03                            | A                      | A         | A       | A  | A        | A          | A       | A  | A        | A        | A       | A  | A             | A      | A       | A      | A          | A      | A       | A      | A        | A      | A       | A      | A      | A      | A       | A      | A      | A | A       | A  | A      | A | A       | A  | A      | A | A       | A  | A      | A | A       | A  |        |   |         |    |        |   |         |    |        |   |         |    |
| 17         | IR 64              | <i>Pia</i>    | Pia_H04                            | B                      | B         | A       | B  | B        | B          | A       | B  | B        | B        | A       | B  | B             | B      | A       | B      | B          | B      | A       | B      | A        | B      | -       | -      | B      | A      | -       | -      | A      | B | -       | -  | A      | B | -       | -  | A      | B | -       | -  | A      | B | -       | -  |        |   |         |    |        |   |         |    |        |   |         |    |
| 18         | Hoshiaoba          | <i>Pia</i>    | Pia_H04                            | B                      | B         | A       | B  | B        | B          | A       | B  | B        | B        | A       | B  | B             | B      | A       | B      | B          | B      | A       | B      | B        | B      | A       | B      | B      | B      | A       | B      | B      | B | A       | B  | B      | B | A       | B  | B      | B | A       | B  |        |   |         |    |        |   |         |    |        |   |         |    |        |   |         |    |
| 19         | Kasalath           | -             | Pia_H03                            | A                      | A         | A       | A  | A        | A          | A       | A  | A        | A        | A       | A  | A             | A      | A       | A      | A          | A      | A       | A      | A        | A      | A       | A      | A      | A      | A       | A      | A      | A | A       | A  | A      | A | A       | A  | A      | A | A       | A  | A      | A | A       | A  |        |   |         |    |        |   |         |    |        |   |         |    |
| 20         | Yumetoiro          | <i>Pia</i>    | Pia_H04                            | B                      | B         | A       | B  | B        | B          | A       | B  | B        | B        | A       | B  | B             | B      | A       | B      | B          | B      | A       | B      | A        | B      | -       | -      | B      | A      | -       | -      | A      | B | -       | -  | A      | B | -       | -  | A      | B | -       | -  | A      | B | -       | -  |        |   |         |    |        |   |         |    |        |   |         |    |
| 21         | IR 24              | <i>Pia</i>    | Pia_H04                            | B                      | B         | A       | B  | B        | B          | A       | B  | B        | B        | A       | B  | B             | B      | A       | B      | B          | B      | A       | B      | B        | B      | A       | B      | B      | B      | A       | B      | B      | B | A       | B  | B      | B | A       | B  | B      | B | A       | B  |        |   |         |    |        |   |         |    |        |   |         |    |        |   |         |    |
| 22         | Nanatsuboshi       | <i>Pia</i>    | Pia_H01-2                          | A                      | A         | B       | B  | A        | A          | B       | B  | A        | A        | B       | B  | A             | A      | B       | B      | B          | B      | -       | -      | B        | B      | -       | -      | B      | B      | -       | -      | B      | B | -       | -  | B      | B | -       | -  | B      | B | -       | -  | B      | B | -       | -  |        |   |         |    |        |   |         |    |        |   |         |    |
| 23         | Guizhao 2          | <i>Pia</i>    | Pia_H07                            | B                      | B         | A       | B  | B        | B          | A       | B  | B        | B        | A       | B  | B             | B      | A       | B      | B          | B      | A       | B      | A        | B      | -       | -      | A      | B      | -       | -      | A      | B | -       | -  | A      | B | -       | -  | A      | B | -       | -  | A      | B | -       | -  |        |   |         |    |        |   |         |    |        |   |         |    |

**B**

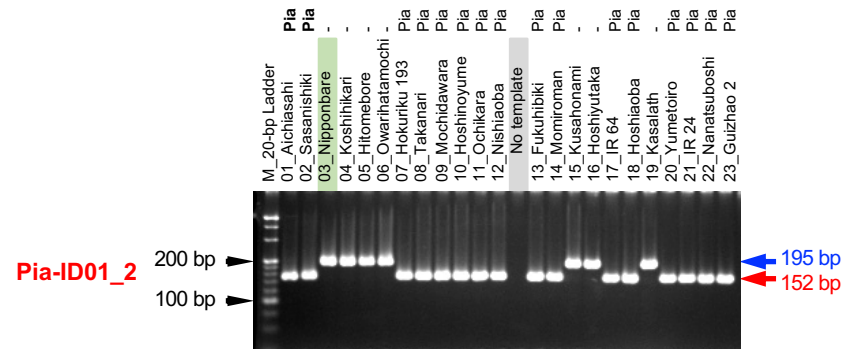

Supplemental Fig. 11-7. InDel marker set for *Pia* locus





**A**

| Sample No. | Cultivar/Line name | Target allele | SNP genotyping assays<br>Haplotype ID | InDel marker genotypes            |     |                |    |   |   |   |   |   |   |   |   |          |    |    | SNP-haplotype |    |    |        |        |        |        |        |        |   |   |   |
|------------|--------------------|---------------|---------------------------------------|-----------------------------------|-----|----------------|----|---|---|---|---|---|---|---|---|----------|----|----|---------------|----|----|--------|--------|--------|--------|--------|--------|---|---|---|
|            |                    |               |                                       | Marker                            | No. | IRGSP-1.0 Chr. | 1  | 2 | 3 | 4 | 5 | 6 | 7 | 8 | 9 | 10       | 11 | 12 | 13            | 14 | 15 | FA4580 | FA4571 | FA4572 | FA4565 | FA4585 | FA4588 |   |   |   |
| 1          | Yashiromochi       | -             | Pita-2_H03                            | Pita-2-ID001                      | 1   | 10725835       | 12 | B | B | B | B | B | A | A | A | 10824087 | 12 | A  | B             | B  | A  | B      | A      | B      | B      | A      | A      | A | B | B |
| 2          | Ikuhikari          | <i>Pita-2</i> | Pita-2_H01                            | Pita-2-ID002                      | 2   | 10736661       | 12 | B | B | B | B | B | A | A | A | 10833348 | 12 | B  | B             | B  | A  | B      | A      | B      | B      | A      | A      | A | B | B |
| 3          | Nipponbare         | <i>Pi19</i>   | Pita-2_H02                            | Pita-2-ID003                      | 3   | 10745092       | 12 | A | A | A | A | A | A | A | A | 10833494 | 12 | A  | A             | A  | A  | A      | A      | A      | A      | A      | A      | A | A |   |
| 4          | IR 24              | <i>(Pi20)</i> | Pita-2_H04                            | Pita-2-ID004                      | 4   | 10760837       | 12 | A | A | B | B | - | B | B | B | 10853795 | 12 | A  | B             | C  | B  | -      | B      | A      | A      | A      | A      | A | A | B |
| 5          | IR 64              | <i>Pita-2</i> | Pita-2_H01                            | Pita-2-ID006                      | 6   | 10771016       | 12 | B | B | B | B | B | A | A | A | 10862608 | 12 | B  | B             | B  | A  | B      | A      | B      | B      | A      | A      | A | B | B |
| 6          | Koshihikari        | <i>Pi19</i>   | Pita-2_H02                            | Pita-2-ID007                      | 7   | 10797537       | 12 | A | A | A | A | A | A | A | A | 10876975 | 12 | A  | A             | A  | A  | A      | A      | A      | A      | A      | A      | A | A |   |
| 7          | Tadukan            | <i>Pita-2</i> | Pita-2_H01                            | Pita-2-ID008                      | 8   | 10810754       | 12 | B | B | B | B | A | A | A | A | 10894020 | 12 | B  | B             | B  | A  | B      | A      | B      | B      | A      | A      | A | B | B |
| 8          | Guizhao 2          | -             | Pita-2_H03                            | <i>Pita-2-ID009</i>               | 9   | 10815778       | 12 | B | B | B | B | B | A | A | A | 10896196 | 12 | B  | B             | B  | A  | B      | A      | B      | B      | A      | A      | A | B | B |
| 9          | Hokuriku 193       | <i>(Pi20)</i> | Pita-2_H04                            | <i>Pita-2_CDS_Upstream side</i>   | 10  | 10833348       | 12 | A | A | A | A | A | A | A | A | 10801324 | 12 | A  | B             | C  | B  | -      | B      | A      | A      | A      | A      | A | A | A |
| 10         | Yatanomochi        | <i>Pi19</i>   | Pita-2_H06                            | <i>Pita-2_CDS_Downstream side</i> | 11  | 10853795       | 12 | B | - | B | B | - | A | A | A | 10830872 | 12 | B  | B             | B  | A  | B      | A      | B      | B      | A      | A      | A | B | B |
| 11         | Kasalath           | <i>Pi19</i>   | Pita-2_H02                            | <i>Pita-2_CDS_Upstream side</i>   | 12  | 10862608       | 12 | A | A | A | A | A | A | A | A | 10833033 | 12 | A  | A             | A  | A  | A      | A      | A      | A      | A      | A      | A | A |   |
| 12         | Deng Pao Zhai      | -             | Pita-2_H03                            | <i>Pita-2_CDS_Downstream side</i> | 13  | 10876975       | 12 | B | B | B | B | A | A | A | A | 10833387 | 12 | B  | B             | B  | A  | B      | A      | B      | B      | A      | A      | A | B | B |
| 13         | Owarihatamochi     | <i>Pi19</i>   | Pita-2_H02                            | <i>Pita-2_CDS_Upstream side</i>   | 14  | 10894020       | 12 | A | A | A | A | A | A | A | A | 10833494 | 12 | A  | A             | A  | A  | A      | A      | A      | A      | A      | A      | A | A |   |
| 14         | Sasanishiki        | <i>Pi19</i>   | Pita-2_H02                            | <i>Pita-2_CDS_Downstream side</i> | 15  | 10896196       | 12 | A | A | A | A | A | A | A | A | 10849598 | 12 | A  | A             | A  | A  | A      | A      | A      | A      | A      | A      | A | A |   |
| 15         | Sasanishiki BL6    | -             | ND                                    |                                   |     |                |    | B | B | B | B | A | A | A |   |          | B  | B  | A             | B  | A  | B      |        | A      | A      | A      | A      | A |   |   |
| 16         | Fukuhibiki         | <i>Pi19</i>   | Pita-2_H02                            |                                   |     |                |    | A | A | A | A | A | A | A |   |          | A  | A  | A             | A  | A  | A      |        | A      | A      | A      | A      | A |   |   |
| 17         | Momiroman          | <i>(Pi20)</i> | Pita-2_H04                            |                                   |     |                |    | A | A | B | - | B | B | B |   |          | B  | C  | B             | -  | B  | A      |        | B      | B      | -      | A      | B |   |   |
| 18         | Bekogonomi         | <i>Pi19</i>   | Pita-2_H02                            |                                   |     |                |    | A | A | A | A | A | A | A |   |          | A  | A  | A             | A  | A  | A      |        | A      | A      | A      | A      | A |   |   |
| 19         | Hoshinoyume        | <i>Pi19</i>   | Pita-2_H02                            |                                   |     |                |    | A | A | A | A | A | A | A |   |          | A  | A  | A             | A  | A  | A      |        | A      | A      | A      | A      | A |   |   |
| 20         | Mochidawara        | <i>(Pi20)</i> | Pita-2_H04                            |                                   |     |                |    | A | A | B | B | - | B | B |   |          | B  | C  | B             | -  | B  | A      |        | B      | B      | -      | A      | B |   |   |
| 21         | Yumetoiro          | <i>(Pi20)</i> | Pita-2_H04                            |                                   |     |                |    | A | A | B | B | - | B | B |   |          | A  | B  | C             | B  | -  | B      | A      |        | B      | B      | -      | A | B |   |
| 22         | Taporuri           | -             | Pita-2_H03                            |                                   |     |                |    | B | B | B | B | A | A | A |   |          | B  | B  | A             | B  | A  | B      |        | B      | A      | A      | A      | B |   |   |
| 23         | Bekooba            | <i>Pita-2</i> | Pita-2_H01                            |                                   |     |                |    | B | B | B | B | A | A | A |   |          | B  | B  | A             | B  | A  | B      |        | B      | A      | A      | B      | B |   |   |

**B**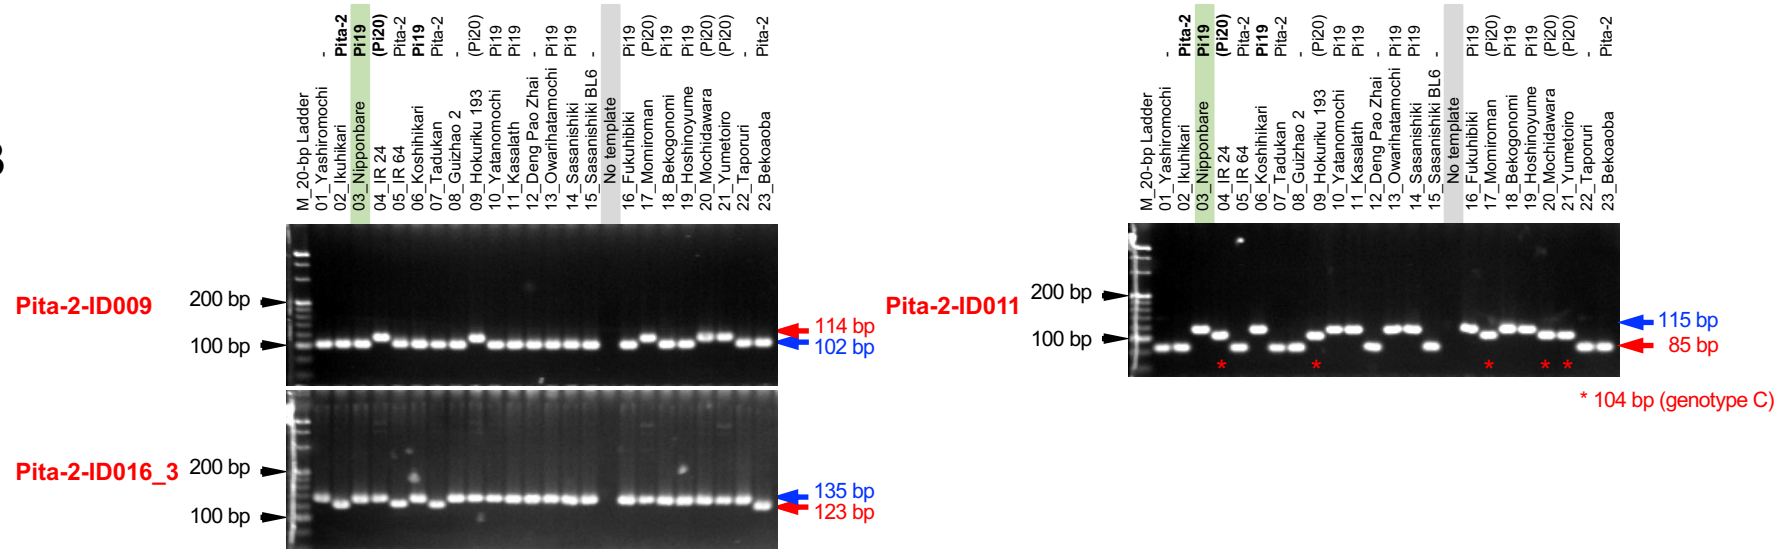Supplemental Fig. 11-10. InDel marker set for *Pita-2* locus
