# Supplementary material for: Rapid DNA-genotyping system targeting ten loci for resistance to blast disease in rice
Source: PubMed Central journal article supplement — Breed Sci. 2019 Feb 15;69(1):68–83. doi: 10.1270/jsbbs.18143 (PMC6507720; doi:10.1270/jsbbs.18143), 2019-02-15
Supplement: 69_18143_2.pdf [file 69_18143_2.pdf]

(Continued)

|                     |                        |   |   |                 |                                                                                                                                                                                                                                                |
|---------------------|------------------------|---|---|-----------------|------------------------------------------------------------------------------------------------------------------------------------------------------------------------------------------------------------------------------------------------|
| Eiko                | † Japan(Hokkaido)      | I | P | Pia or +        | A A C C T T G A C C T C A C C A C T T G C G T C G G G A C C T C G T A A G A G G C A G C G G G G C G C C G T T G C G C C C A A C A G C C G A - - - - - C C A G A T A A C C C G - A T - G A Pia                                                  |
| Eminoaki            | † Japan(Akita)         | I | P | Pii Pia         | A A C C C A G G C C A C A C G A C C T T G C G T C G G G G G C T C G T G T G G G A G C G G A G G G G T G A A T C G C C C A A G G C C C G C C C G T A A C T C G G G T A A C C T A A G T [A] G G Pish Pii Pia Pik-s P19                           |
| Fujihikari          | † Japan(Hiroshima)     | I | P | Pi Pia          | A A C C C A G G C C A C A C G A C C T T G C G T C G G G A C C T C G T A A T G G G A G C G G G G C G C C T T T G C G C C A A G G C C C G C C C G T A A C T C G G G T A A C C T A A G T [A] G G Pish Pia Pik-s P19                               |
| Fujimimori          | † Japan(Aomori)        | I | P | Pia             | A A C C C A G G C C A C A C G A C C T T G C G T C G G G G G C T C G T G T G A G G A G C G G G G C G C C T T T G C G C C A A G G C C C G C C C G T A A C T C G G G T A A C C T A A G T [A] G G Pish Pia Pik-s P19                               |
| Fujisaka 5          | † Japan(Aomori)        | I | P | Pii             | A A C C T T G A T C T C A C C A C C T T G C G T C G G G G G C T C G T G T G T A G G A G C G G G G G G G T G A A T G G G C A A A C G C C C G C C C G T A A C T C G G G T A A C C T A A G T [A] G G Pii Pik-s P19                                |
| Fukuhibiki          | † Japan(Akita)         | I | P | Pib Pia         | A A C C T T G G C C A C A C G A C C G G T G C T G T G G G C T C G T G T G T G G G A G C G G G G C G C C T T T G C G C C A A G G G C G A - - - - - C T A G A T A A C C C G A G T [A] G G Pish Pib Pia P19                                       |
| Fukuzumi            | † Japan(Fukuoka)       | I | P | Pii             | A A C C T T G G C C A C A C G A C C T T G C G T C G G G G G C T C G T G T G T G G G A G C G G A G G G G T G A A T G G G C A A A C G C C C G C C C G T A A C T C G G G T A A C C T A A G T [A] G G Pish Pii Pik-s P19                           |
| Fukumar             | † Japan(Ibaraki)       | I | P | Pii             | A A C C T T G G C C A C A C G A C C T T G C G T C G G G G G C T C G T G T G T G G G A G C G G A G G G G T G A A T G G G C A A A C G C C C G C C C G T A A C T C G G G T A A C C T A A G T [A] G G Pish Pii Pik-s P19                           |
| Fukunishiki         | † Japan(Akita)         | I | P | Piz             | A A C C C A G G C C A C A C G A C C T T G C G T C G G G A C C T C G T A A T G G G A G C G G G G C G C C T T T G G G G C A A A C G G C C G A - - - - - C T A G A T A A C C C A A G T [A] G G Pish Pia P19                                       |
| Fusakogane          | † Japan(Chiba)         | I | P | Pii Pia         | A A C C T T G G C C A C A C G A C C T T G C G T C G G G G G C T C G T G T G T G G G A G C G G G G G G T G A A T C G C C A A A C G C C C G C C C G T A A C T C G G G T A A C C C G A G T [A] G G Pish Pii Pia Pik-s P19                         |
| Fusaotome           | † Japan(Chiba)         | I | P | Pii             | A A C C T T G G C C A C A C G A C C T T G C G T C G G G G G C T C G T G T G T G G G A G C G G A G G G G T G A A T G G G C A A A C G G C C G A - - - - - C T A G A T A A C C T A A G T [A] G G Pish Pii P19                                     |
| Futaba              | † Japan(Aichi)         | I | P | Pia             | A A C C T T G A T C T C A C C A C C T T G C G T C G G G A C C T C G T A A G A G G G A G C G G G G C G C C T T T G C G C C A A G G G C C G A - - - - - C T A G A T A A C C C G A G T [A] G G Pia P19                                            |
| Gaisen mochi        | † Japan(Unknown)       | L | U | +               | A G C - C A G A C C T C A C C A C T T G C G T C G G G G G C T C G T G T G T G G G A G C G G G G C G C C T T T G G G T A A - G C C C A A A G - - - - - C T A G A T A A C C C G A G T [A] G G P19                                                |
| Genkikusushi        | † Japan(Fukuoka)       | I | P | Pii             | A A C C T T G G C C A C A C G A C C T T G C G T C G G G G G C T C G T G T G T G G G A G C G G A G G C G G T G A A T G G G C A A A C G C C C G C C C G T A A C T C G G G T A A C C T A A G T [A] G G Pish Pii Pik-s P19                         |
| Gimbozu             | † Japan(Ishikawa)      | L | P | +               | A A C C T T G G C C A C A C G A C C T T G C G T C G G G A C C T C G T A A G A G G G A G C G G G C G C C T T T G G G C A A A C A G C C G A - - - - - C C A G A T A A C C T A A G T [A] G G Pish P19                                             |
| Gohyakumangoku      | † Japan(Niigata)       | I | P | Pii             | A A C C C A G A T C T C A C C A C C T T G C G T C G G G G G C T C G T G T G T A G G A G C G G G G G G T G A A T G G G C A A A C G C C C G C C C G T A A C T C G G G T A A C C C G A G T [A] G G Pii Pik-s P19                                  |
| Goropikari          | † Japan(Gumma)         | I | P | Pii             | A A C C T T G G C C A C A C G A C C T T G C G T C G G G G G C T C G T G T G T G G G A G C G G A G G G G T G A A T G G G C A A A C G G C C G A - - - - - C T A G A T A A C C C G A G T [A] G G Pish Pii P19                                     |
| Guizhao 2           | China                  | I | P | -               | A G C A C T T G C T T T A T C G C C G G T C T C T G T G G C C T C G T A A G T G G G G C A T G A G T G C G T T T G T C C A G C - G - C C G C C A - C T T A C T C G G A T C T A C C G G G T [A] C A PIS/P13 Pia Pik-s Pita                       |
| Habataki            | Japan(Niigata)         | I | P | Unknown         | A G C A C T T G C T T T A T C G C C G G T G C T G T G G C C T C G A A A G T G G G A A T G G G G C G C T T T G G G C C A G C C C G C C C G T A A C T C G G G T A T C G C G G C C - G A Pib Pia Pik-s P120                                       |
| Haenuki             | † Japan(Yamagata)      | I | P | Pii Pia         | A A C C T T G G C C A C A C G A C C T T G C G T C G G G G G C T C G T G T G T G G G A G C G G G G G G T G A A T C G C C A A G G C C C G C C C G T A A C T C G G G T A A C C T A A G T [A] G G Pish Pii Pia Pik-s P19                           |
| Haigokoro           | † Japan(Hiroshima)     | I | P | Pia             | A A C C T T G G C C A C A C G A C C T T G C G T C G G G G G C T C G T G T G T A G C A G C G G G G C G C C T T T G C G C C A A G G G C C G A - - - - - C T A G A T A A C C T A A G T [A] G G Pish Pia P19                                       |
| Hamasaki            | † Japan(Aomori)        | I | P | Pib Pii Pia Pik | A A C C T T G G C C A C A C G A C C G G T G C T G T G A C C T C G T A A G A G G G A G C G G G G G G T G A A T C G C C A A C A G T C G C C A C G T A A T T C G G A G A A C C T A A G T [A] G G Pish Pib Pii Pia Pik P19                         |
| Hamasaki            | Japan(Saitama)         | I | P | Pia             | A A C C C A G G C C A C A C G A C C T T G C G T C G G G G G C T C G T G T G T G G G A G C G G A G C G C C T T T G C G C C A A G G G C C G A - - - - - C T A G A T A A C C T A A G T [A] G G Pish Pia P19                                       |
| Hanaechizen         | † Japan(Fuku)          | I | P | Piz Pii         | A A C C T T G G C C A C A C G A C C T T G C G T C G G G A C C T C G T A A C T G G G A G C G G G G G G T G A A T G G G C A A A G G G C G A - - - - - C T A G A T A A C C C G A G T [A] G G Pish Pia Pii P19                                     |
| Hananomai           | † Japan(Yamagata)      | I | P | Pii             | A A C C T T G G C C A C A C G A C C T T G C G T C G G G G G C T C G T G T G T G G G A G C G G A G G G G T G A A T G G G C A A A C G C C C G C C C G T A A C T C G G G T A A C C C G A G T [A] G G Pish Pii Pik-s P19                           |
| Harumoni            | † Japan(Fukuoka)       | I | P | Pii Pia         | A A C C C A G G C C A C A C G A C C T T G C G T C G G G A C C T C G T A A G A G G G A G C G G A G G G G T G A A T C G C C A A A C G C C C G C C C G T A A C T C G G G T A A C C C A A G T [A] G G Pish Pii Pia Pik-s P19                       |
| Haruru              | † Japan(Yamaguchi)     | I | P | Pia             | A A C C T T G A T C T C A C C A C T T G C G T C G G G G G C T C G T G T G T G G G G C A T G C G C C G T T G C G C C A A G G C C C G C C C G T A A C T C G G G T A A C C T A A G T [A] G G Pia Pik-s P19                                        |
| Hashirikobou        | † Japan(Hokkaido)      | I | P | Pia             | A A C C C A G A C C T C A C C A C C T T G C G T C G G G A C C T C G T A A G A G G G A G C G G G G C G C C T T T G C G C C A A C A G C C G A - - - - - C C A G A T A A C C C G - A T - G A Pia                                                  |
| Hatsuboshi          | † Japan(Aichi)         | I | P | Pii             | A A C C T T G G C C A C A C G A C C T T G C G T C G G G G G C T C G T G T G T G G G A G C G G A G G G G T G A A T G G G C A A A C G C C C G C C C G T A A C T C G G G T A A C C T A A G T [A] G G Pish Pii Pik-s P19                           |
| Hatsunishiki        | † Japan(Akita)         | I | P | +               | A A C C T T G G C C A C A C G A C C T T G C G T C G G G G G C T C G T G T G T G G G A G C G G G G C G C C T T T G G G C A A A C G G C C G A - - - - - C T A G A T A A C C C A A G T [A] G G Pish P19                                           |
| Hatsushimo          | † Japan(Aichi)         | I | P | Pia             | A A C C C A G G C C A C A C G A C C T T G C G T C G G G A C C T C G T A A G A G G G A G C G G G G C G C C T T T G G C C A A G G G C C G A - - - - - C T A G A T A A C C T A A G T [A] G G Pish Pia P19                                         |
| Hatsushizuku        | † Japan(Hokkaido)      | I | P | Pik             | A A C C T T G G C C A C A C G A C C T T G C G T C G G G A C C T C G T A A G A G G C A G C G G G G C C G C T T T G G G C A A A C A G T C G C C A C G T A A T T C G G A G A A C C C G A G T [A] G G Pish Pik P19                                 |
| Hayamasari          | † Japan(Hokkaido)      | I | P | Pii Pia Pik     | A A C C T T G G C C A C A C G A C C T T G C G T C G G G G G C T C G T G T G T G A C C T C G T A A G A G G C A G C G G G G G G T G A A T C G C C A A A C A G T C G C C A C G T A A T T C G G A G A A C C C G A G T [A] G G Pish Pii Pia Pik P19 |
| Himegonomi          | † Japan(Hiroshima)     | I | P | Pia             | A A C C C A G G C C A C A C G A C C T T G C G T C G G G G G C T C G T G T G T G G G A G C G G A G G G G T G A A T C G C C A A G G C C C G C C C G T A A C T C G G G T A A C C C A A G T [A] G G Pish Pia P19                                   |
| Himenomochi         | † Japan(Akita)         | I | P | Pik             | A A C C C A G G C C A C A C G A C C T T G C G T C G G G G G C T C G T G T G T G G G A G C G G G G C G C C T T T G G G G C A A A C G C C C G C C C G T A A C T C G G G T A A C C T A A G T [A] G G Pish Pii Pia Pik-s P19                       |
| Hinohikari          | † Japan(Miyazaki)      | I | P | Pii Pia         | A A C C C A G G C C A C A C G A C C T T G C G T C G G G G G C T C G T G T G T G G G A G C G G A G G G G T G A A T C G C C A A G G C C C G C C C G T A A C T C G G G T A A C C T A A G T [A] G G Pish Pii Pia Pik-s P19                         |
| Hinohikari Kanto B2 | † Japan(Ibaraki)       | I | P | Pii Pia Pik-m   | A A C C C A G G C C A C A C G A C C T T G C G T C G G G G G C T C G T G T G T G G G A G C G G A G G G G T G A A T C G C C A A G G C C C G C C C G T A A C T C G G G T A A C C C A A G T [A] G G Pish Pii Pia Pik-m P19                         |
| Hirayama            | † Japan(Tokyo)         | L | U | Pia             | G G C C C T G A C C T C A C C A C T T G C G T C G G G G G C T C G T G T G T G G G A G C G G G G C G C C T T T G G C C A A G G G C C G A - - - - - C T A G A T A A C C C G A G T [A] G G Pia P19                                                |
| Hitohana            | † Japan(Fukuoka)       | I | P | Pia             | A A C C C A G G C C A C A C G A C C T T G C G T C G G G G G C T C G T G T G T G G G A G C G G A G C G C C T T T G G C C A A A G G C C G A - - - - - C T A G A T A A C C C G A G T [A] G G Pish Pia P19                                         |
| Hitomebore          | † Japan(Miyagi)        | I | P | Pii             | A A C C T T G G C C A C A C G A C C T T G C G T C G G G G G C T C G T G T G T G G G A G C G G A G G G G T G A A T G G G C A A A C G C C C G C C C G T A A C T C G G G T A A C C T A A G T [A] G G Pish Pii Pik-s P19                           |
| Hiyokumochi         | † Japan(Fukuoka)       | I | P | Pia             | A A C C T T G A T C T C A C C A C C T T G C G T C G G G A C C T C G T A A G A G G G A G C G G G G C G C C T T T G G C C A A A C G C C C G C C C G T A A C T C G G G T A A C C C A A G T [A] G G Pish Pii Pik-s P19                             |
| Hokkai 188          | Japan(Hokkaido)        | I | P | P135            | A A C C T T T G C C A C A C G G A C T G C G T C G G G G G C T C G T G T G T A G G A G C G G G G C G C C G T T T G G G C A A A C G G C C G A - - - - - C T A G A T A A C C C G A G T [A] G G P135 P19                                           |
| Hokkarin            | † Japan(Aomori)        | I | P | Pii Pia         | A A C C T T G G C C A C A C G A C C T T G C G T C G G G G G C T C G T G T G T A G G A G C G G G G G G T G A A T C G C C A A A C G C C C G C C C G T A A C T C G G G T A A C C C A A G T [A] G G Pish Pii Pia Pik-s P19                         |
| Hokuriku 193        | Japan(Niigata)         | I | P | Pii P120        | A G C A C T T G C C T A C C T C G C C G T C T C T G T G G C C T C G A A A G T G G G A A T G G G A G T G C G T T T G T C C A G C C G C C C G C C C G T A A C T C G G G T A T C G C G G C A C - G A PIS/P13 Pia Pik-s P120                       |
| Hokurikumochi 181   | Japan(Niigata)         | I | P | -               | A G C A C T T G C T T T A T C G C C G G T C G T G T G G C C T C G T A A G T G G G G C A T G C G C C G T A T G T C C A G C G C C C A C C A - C T T A C T C A G A T A T C G C G G A C C - G A Pib Pia New gene(Pik_H04-3)† P120                  |
| Honenwase           | † Japan(Fuku)          | I | P | +               | A A C C T T G G C C A C A C G A C C T T G C G T C G G G G G C T C G T G T G T G G G A G C G G G G C G C C T T T G G G C A A A C G C C C G C C C G T A A C T C G G G T A A C C C G A G T [A] G G Pish Pik-s P19                                 |
| Hong Cheuh Zai      | China                  | U | P | -               | A G C A C T T G G C C T C A T C A C C G G T C T G T G G G G C T C G T G T G T G G G A G C A T G C G C C G T T G G G C - A - A G C C G C C A C C T T A C T C G G A T C T A C C G G T [A] C A Pik-s Pita                                         |
| Hoshiaoba           | Japan(Hiroshima)       | I | P | Pib Pita-2      | A A C C T T G G C C A C A C G A C C G G T G C T G T G G G C T C G T G T G T A G G A G C G G G G C G C C T T T G T C C A G C C C C G C C G T A A C T C G G G T A T C G C G G A C C - G A Pish Pib Pia Pik-m P120                                |
| Hoshijirushi        | † Japan(Ibaraki)       | I | P | +               | A A C C C A G G C C A C A C G A C C T T G C G T C G G G G G C T C G T G T G T G G G A G C G G G G C G C C T T T G G G C A A A C G G C C G A - - - - - C T A G A T A A C C C G A G T [A] G G Pish P19                                           |
| Hoshimaru           | † Japan(Hokkaido)      | I | P | Pii Pia         | A A C C T T G G C C A C A C G A C C T T G C G T C G G G G G C T C G T A A G A G G A G C G G G G G G T G A A T C G C C A A A C A G C C G A - - - - - C C A G A T A A C C C G A G T [A] G G Pish Pii Pia P19                                     |
| Hoshinishiki        | Japan(Ibaraki)         | I | P | Pii Pik         | A A C C C A G G C C A C A C G A C C T T G C G T C G G G G G C T C G T G T G T G G G A G C G G A G G G G T G A A T G G G C A A A C G G C C G C C A - C T T A C T C A C A T A A C C T A A G T [A] G G Pish Pii New gene(Pik_H12)† P19            |
| Hoshinoyake         | † Japan(Hokkaido)      | I | P | Pii Pia Pik     | A A C C T T G A T C T C A C C A C T T G C G T C G G G A C C T C G T A A G A G G A G C G G G G G G T G A A T C G C C A A A C A G T C G C C A C G T A A T T C G G A G A A C C T A A G T [A] G G Pii Pia Pik P19                                  |
| Hoshiyutaka         | Japan(Hiroshima)       | I | P | Pii Pik         | A G C C C T G G C C A C A C G A C C G G T C T A G G G C T C G T G T G T G G G A G C G G A G G G G T G T T T G G G C A A A C G G C C G C C A - C T T A C T C A C A T A A C C T A A G T [A] G G Pish Pii New gene(Pik_H12)† P19                  |
| Hosogara            | † Japan(Aomori)        | L | P | Pia or +        | A A C C T T G G C C A C A C G A C C T T G C G T C G G G G G C T C G T G T G T G G G A G C G G G G C G C C T T T G G G C A A A C G C C C G C C C G T A A C T C G G G T A A C C C G - A T - G A Pish Pik-s                                       |
| Hayoku              | † Japan(Fukuoka)       | I | P | Pia             | A A C C T T G A T C T C A C C A C C T T G C G T C G G G A C C T C G T A A G A G G G A G C G G G G C G C C T T T G G C C A A G G C C C G C C C G T A A C T C G G G T A A C C C G A G T [A] G G Pia Pik-s P19                                    |
| Ichibamboshi        | † Japan(Ibaraki)       | I | P | Pii             | A A C C C A G G C C A C A C G A C C T T G C G T C G G G G G C T C G T G T G T G G G A G C G G A G G G G T G A A T G G G C A A A C G G C C G A - - - - - C T A G A T A A C C C G A G T [A] G G Pish Pii P19                                     |
| Ikuhikari           | † Japan(Fuku)          | I | P | Pii Pita-2      | A A C C T T G G C C A C A C G A C C T T G C G T C G G G G G C T C G T G T G T G G G A G C G G G G G G T G A A T G G G C A A A C G C C C G C C C G T A A C T C G G G T C T A C C G G T [B] C A Pish Pii Pik-s Pita Pita-2                       |
| Inabawase           | † Japan(Niigata)       | I | P | Pii             | A A C C T T G G C C A C A C G A C C T T G C G T C G G G G G C T C G T G T G T A G G A G C G G G G G G T G A A T G G G C A A A C G C C C G C C C G T A A C T C G G G T A A C C C A A G T [A] G G Pish Pii Pik-s P19                             |
| IR 24               | Philippines            | I | P | -               | A G C A C T T G C T T T A T C G C C G G T G C T G T G G C C T C G T A A G T G G G G C A T G C G C C G T A T G T C C A G C G C C T G G C A C C T T A C T C G G A T A T C G C G G A C C - G A Pib Pia Pik-s P120                                 |
| IR 36               | Philippines            | I | P | -               | A G C - C A T G C T T T A T C G C C G G T G C T G T G G C C T C G T A A G T G G G G C A T G C G C C G T A T G T C C A G C G C C C A C C A - C T T A C T C A G A T C T A C C G G A C C - G A Pib New gene(Pik_H04-3)† Pita                      |
| IR 64               | Philippines            | I | P | -               | A G C - C A G G C T A C C T C G C C G G T G C T G T G G C C T C G A A A G T G G G G C A T G C G C C G T A T G T C C A G C C G C C C A C C A - C T T A C T C A G A T C T A C C G G T [B] C A Pib Pia New gene(Pik_H04-3)† Pita Pita-2           |
| IRBL1-CL[LT]        | Philippines(IRR), Japa | I | P | (P1)            | A A C C C A G G C C A C A C G G A C T T G C G T C G G G G G C T C G T G T G T G G G C T C G T A A G T G G G G C A T G C G C C T T T G G G C A A A C G C C C G C C C G T A A C T C G G G T A A C C C G - A T - G A P11                          |
| IRBL19-A            | Philippines(IRR), Japa | I | P | (P19)           | A A C C C A G A C C T C A C C A C C T T G C G T C G G G G G C T C G T G T G T G G G A G C G G G G C G C C T T T G G G T A A - G C C C G A - - - - - C T A G A T A A C C T A A G T [A] G G P19                                                  |
| IRBL3-CP4           | Philippines(IRR), Japa | I | P | (P13)           | A A C C C A G G C C A C A C G A C C T T G C G T C G G G G G C T C G T G T G T G G G A G C G G G A G T G C G T T T G G G C A A A C G G C C G A - - - - - C C A G A T A A C C C G - A T - G A PIS/P13                                            |
| IRBL3-CP4[LT]       | Philippines(IRR), Japa | I | P | (P13)           | A A C C C A G G C C A C A C G A C C T T G C G T C G G G G G C T C G T G T G T G G G A G C G G G A G T G C G T T T G G G C A A A C A G C C G C C A - C T A A T T C G G A G A A C C C G - A T - G A PIS/P13 Pik-I                                |
| IRBL5-M             | Philippines(IRR), Japa | I | P | (P15)           | A A C C C A T G C T T T A T C G C C T T G C G T C G G G G G C T C G T G T G T G G G A G C G G G A G T G C G T T T G G G C A A A C A G C C G C C A - C T A A T T C G G A G A A C C C G - A T - G A PIS/P13 Pik-I                                |
| IRBL5-M[LT]         | Philippines(IRR), Japa | I | P | (P15)           | A A C C C A G A C C T C A C C A C C T T G C G T C G G G G G C T C G T G T G T G G G A G C G G G A G T G C G T T T G G G C A - - - - - A G C C G C C A - C T A A T T C G G A G A A C C C G - A T - G A PIS/P13 Pia Pik-I                        |
| IRBL5-M[US]         | Philippines(IRR), Japa | I | P | (P15)           | A G C - C A T G C T T T A T C G C C G T C T C T G T G G C C T C G A A A T G G G A A T G G G A G T G C G T T T G G G C A - - - - - G C C C G C - - - - - C C A G A T A C C C G G A C C - G A No                                                 |
| IRBL7-M[US]         | Philippines(IRR), Japa | I | P | (P17)           | A A C C C A G G C C A C A C G G A C T T G C G T C G G G G G C T C G T G T G T G G G A G C G G G G C G C C T T T G G G C A A A C G C C G A C A C - C T A C T C G G A T A A C C C G - A T - G A P17                                              |
| IRBL9-W[LT]         | Philippines(IRR), Japa | I | P | (P19)           | A A C C C A G A C C T C A C C A C C G G T G C T G T G A C T T C G T A A G T G G G G C A T G C G C C T T T G G G C A A A C A G C C G C C A - C T A A T T C G G A G A A C C C G - A T - G A Pib P19 Pik-I                                        |

(Continued)

Table with columns for gene names (e.g., IRBL9-W[US], IRBLkH-K3), country codes (e.g., Philippines, Japan, India), and accession numbers (e.g., P19, P1k-h). The table contains multiple rows of data for various genes and locations, including a large block of identical sequences for the P19 gene across many different entries.

(Continued)

|                    |                     |   |   |                |             |                                             |                           |                   |                   |                 |                                           |             |               |                                                       |     |
|--------------------|---------------------|---|---|----------------|-------------|---------------------------------------------|---------------------------|-------------------|-------------------|-----------------|-------------------------------------------|-------------|---------------|-------------------------------------------------------|-----|
| Lake 65            | † Japan (Shiga)     | I | P | -              | A A C C T T | G G C C A C A C G A C C T G C G T C G G     | G G G C T C G T G T G T   | G G G A G C G G A | G G G G T G A A T | C G C C C A A G | G C C C G C C C C G T A A C T C G G G T   | A A C C T A | A G T [A] G G | Pish Pii Pii Pik-s P19                                | -   |
| Leafstar           | Japan (Ibaraki)     | I | P | Pia            | A A C C T T | G G C C A C A C G A C C G G C T C T A G     | G G G C T C G T G T G T   | G G G A G C G G A | G C G C C T T T G | G G G C A A C   | G G C C G C - - - - - - - C T A G A T     | A A C C T A | A G T [A] G G | Pish P19                                              | No  |
| Lebed              | Philippines         | L | P | -              | A G T C C A | G G C T T C A T C A C C G G C G T C T G G   | G G G C T C A T G T G T   | G G G A G C G G G | G C G C G T A A   | G T C C - - C   | G G C C A C C A - C T T A C T C A G A T   | A T C C G A | A G T [A] G G | Pit Pia New gene (Pik_H04-3) <sup>1</sup> P19         | -   |
| Ujiangpintuanheigu | China               | L | P | -              | A A C C C A | G A C C T C A C A C C T G C G T C G G       | G G G C T C G T G T G T   | G G G A G C G G G | G C G C C T T T G | G G G A A A C   | A G C C G C C C A - C T A A T T C G G A T | A A C C C G | A T - G A     | Pik-1                                                 | -   |
| Local Basmati      | India               | L | P | -              | A A C C C A | G G C C A T A T C A C C G G C T C T A G     | G C - - C G - - - -       | G G G A G T G G G | G C G C G T A A T | G G G C A A C   | G G C T G C - - - - - - - C T A G A T     | A T C G G G | A C - G A     | P13 P20                                               | -   |
| Ma sho             | Myanmar (Burma)     | L | P | -              | A G C C C T | G A C C T C A C A C C T G C G T C G G       | G G G C T C G T G T G T   | G G G A G C G G G | G C G C C T T T G | G C C C A A G   | G G C C G A - - - - - - - C C A G A T     | A T C C C G | G G T [A] G A | Pia P19                                               | -   |
| Mairangphoe        | India               | L | P | -              | A G C - C A | T G C C T C A C C C G G C G T C T A G       | G G G C T C G T G T G T   | G G G G C A T G   | G C G C G T A T   | G G G C A A A   | A G C C G C - - - - - - - C C A G A T     | A T C G C G | G A C - G A   | P20                                                   | -   |
| Makimizuho         | Japan (Fukuoka)     | I | P | Unknown        | A A C C T T | G G C C A C A C G A C C T G C G T C G G     | G G G C T C G T G T G T   | G G G A G C G G A | G C G C T T T G   | G T C C A G C   | G C C C G C C C G G T A A C T C G G G T   | A T C G C G | G A C - G A   | Pish Pia Pik-m P20                                    | -   |
| Mal Marso          | Nepal               | L | P | -              | A A C C C A | T G C C T C A C C G C G G C T C T A G       | G G G C T C G T G T G T   | G G G G C A T G   | G C G G C G T A T | G G G C A A A   | G G C C G A - - - - - - - C T A G A T     | A T C - C G | G G T [A] G G | P19                                                   | -   |
| Manamusume         | † Japan (Miyagi)    | I | P | Pii            | A A C C T T | G G C C A C A C G A C T T G C G T C G G     | G G G C T C G T G T G T   | G G G A G C G G A | G G G G T G A A T | G G G C A A A   | G C C C G C C C C G T A A C T C G G G T   | A A C C T A | A G T [A] G G | Pish Pii Pik-s P19                                    | Yes |
| Masshigura         | † Japan (Akita)     | I | P | Pii Pia        | A A C C T T | G G C C A C A C G A C C T G C G T C G G     | G G G C T C G T G T G T   | G G G A G C G G A | G G G G T G A A T | G C C C A A G   | G C C C G C C C C G T A A C T C G G G T   | A A C C T A | A G T [A] G G | Pish Pii Pia Pik-s P19                                | Yes |
| Matsuribare        | † Japan (Aichi)     | I | P | Pii Pia        | A A C C C A | G G C C A C A C G A C C T T G C G T C G G   | G G G C T C G T G T G T   | G G G A G C G G G | G G G G T G A A T | G C C C A A G   | G G C C G A - - - - - - - C T A G A T     | A A C C C G | A T [A] G G   | Pish Pii Pia P19                                      | Yes |
| Menaragala         | Sri Lanka           | L | P | -              | G G C C C T | G G C T T C A T C A C C G T C T C T G T     | G G G C T T G T G T G T   | G G G A G C G G G | G C G C C G T A T | G T C C - - C   | G C C T G C A C C T T A C T C G G A T     | A T C C C G | A T - G A     | Pia-? Pia Pik-s                                       | -   |
| Menkoina           | † Japan (Akita)     | I | P | Pia            | A A C C T T | G G C C A C A C G A C C T T G C G T C G G   | G G G C T C G T G T G T   | G G G A G C G G A | G C G C T T T G   | G C C C A A G   | G C C C G C C C C G T A A C T C G G G T   | A A C C T A | A G T [A] G G | Pish Pia Pik-s P19                                    | Yes |
| Mie 23             | † Japan (Mie)       | I | P | Pii Pia        | A A C C T T | G G C C A C A C G A C C T T G C G T C G G   | G G G C T C G T G T G T   | G G G A G C G G G | G G G G T G A A T | G G G C A A A   | G C C C G C C C C G T A A C T C G G G T   | A A C C T A | A G T [A] G G | Pish Pii Pik-s P19                                    | No  |
| Milyang 23         | Korea               | I | P | -              | A G C A C T | T G C T T T A T C G C C G G T G C T G T     | G G C C T C G T A A G T   | G G G G C A T G   | G C G C C G T A T | G T C C A G C   | G C C T G C A C C T T A C T C G G A T     | A A C C C G | A G T [A] G G | Pib Pii Pik-s P19                                     | -   |
| Milyang 42         | Korea               | I | P | -              | A G C A C T | T G C T T T A T C G C C G G T G C T G T     | G G C C T C G T A A G T   | G G G G C A T G   | G C G C T T T G   | G G G C A A A   | G G C C G A - - - - - - - C C A G A T     | A T C G C G | G A C - G A   | Pib P20                                               | -   |
| Mineasahi          | † Japan (Aichi)     | I | P | Pii Pia        | A A C C T T | G G C C A C A C G A C C T T G C G T C G G   | G G G C T C G T G T G T   | G G G A G C G G G | G G G G T G A A T | G C C C A A G   | G C C C G C C C C G T A A C T C G G G T   | A A C C C G | A G T [A] G G | Pish Pii Pia Pik-s P19                                | Yes |
| Mineharuka         | † Japan (Aichi)     | I | P | Pii            | A A C C T T | G G C C A C A C G A C C T T G C G T C G G   | G G G C T C G T G T G T   | G G G A G C G G A | G G G G T G A A T | G G G C A A A   | G C C C G C C C C G T A A C T C G G G T   | A A C C T A | A G T [A] G G | Pish Pii Pik-s P19                                    | Yes |
| Mirenishiki        | † Japan (Ibaraki)   | I | P | Pia Pik        | A A C C C A | G G C C A C A C G A C C G G C T C T A G     | G G G C T C G T G T G T   | G G G A G C G G G | G C G C C T T T G | G C C C A A G   | G C C C G C C A - C T T A C T C A C A T   | A A C C T A | A G T [A] G G | Pish Pia New gene (Pik_H12) <sup>1</sup> P19          | No  |
| Mizuhatomochi      | † Japan (Ibaraki)   | I | P | Pia or +       | A A C C T T | G G C C A C A C G A C C T G C G T C G G     | G G G C T C G T G T G T   | G G G G T G G G A | G C G C C T T T G | G G G C A A A   | G G C C G A - - - - - - - C T A G A T     | A A C C C G | A G T [A] G G | Pish P19                                              | -   |
| Mizuhochikara      | Japan (Fukuoka)     | I | P | Pib Pita-2 P20 | A A C C C A | G G C C A C A C G A C C G G T G C T G T     | G A C C T C G T A A G A   | A G A G A C G G G | G C G C C T T T G | G C C C A A G   | G C C C G C A C C T T A C T C G G A T     | A T C G G G | A C - G A     | Pish Pib Pia Pik-s P20                                | No  |
| Mizuhonokagayaki   | † Japan (Niigata)   | I | P | Pii            | A A C C T T | G G C C A C A C G A C C T T G C G T C G G   | G G G C T C G T G T G T   | G G G A G C G G A | G G G G T G A A T | G G G C A A A   | G C C C G C C C C G T A A C T C G G G T   | A A C C T A | A G T [A] G G | Pish Pii Pik-s P19                                    | Yes |
| Mizukagami         | † Japan (Shiga)     | I | P | Pii Pia        | A A C C T T | G G C C A C A C G A C C T T G C G T C G G   | G G G C T C G T G T G T   | G G G A G C G G A | G G G G T G A A T | G C C C A A G   | G C C C G C C C C G T A A C T C G G G T   | A A C C T A | A G T [A] G G | Pish Pii Pia Pik-s P19                                | Yes |
| Mochidawara        | Japan (Ibaraki)     | I | P | Unknown        | A G C A C T | T G C T T T A T C G C C G G T G C T G T     | G G C C T C G A A A G T   | G G G A A T G G G | A G T G C G T T T | G T C C A G C   | G C C C A C C A - C T T A C T C A G A T   | A T C G C G | G A C - G A   | Pib PIS/P13 Pia New gene (Pik_H04-3) <sup>1</sup> P20 | -   |
| Modan              | India               | I | P | -              | A A C C C A | T G C C T C A C C C G G C G T C T G G       | G G G C T C G T G T G T   | G G G A A C G G G | G C G C G T A A T | G G C C - A C G | G G C C G C C A - C T T A C T C A C A T   | A T A C C G | G A C - G A   | Pia New gene (Pik_H12) (P20) <sup>1</sup>             | -   |
| Moemoinri          | † Japan (Akita)     | I | P | Pii Pia        | A A C C C A | G G C C A C A C G A C C T T G C G T C G G   | G G G C T C G T G T G T   | G G G A G C G G G | G G G G T G A A T | G C C C A A G   | G C C C G C C C C G T A A C T C G G G T   | A A C C T A | A G T [A] G G | Pish Pii Pia Pik-s P19                                | Yes |
| Mogumoguooba       | Japan (Fukuoka)     | I | P | Unknown        | A G C A C T | G G C C A C A C G A C C G G T G C T G T     | G A C C T C G T A A G A   | A G A G A C G G G | G C G C C T T T G | G T C C A G C   | G C C C G C C A C C T T A C T C G G A T   | A T C G C G | G A C - G A   | Pish Pib Pia Pik-s P20                                | -   |
| Momimoran          | Japan (Ibaraki)     | I | P | Pib Pita P20   | A A C C C A | G G C C A C A C G A C C G G T G C T G T     | G A C C T C G T A A G A   | A G A G A C G G G | G C G C C T T T G | G C C C A A G   | G C C C G C A C C T T A C T C G G A T     | A T C G C G | A C - G A     | Pish Pib Pia Pik-s P20                                | -   |
| Moritawase         | † Japan (Yamagata)  | I | P | +              | A A C C T T | G G C C A C A C G A C C T G C G T C G G     | G G G C T C G T G T G T   | G G G A G C G G G | G C G C C T T T G | G G G C A A A   | A G C C G A - - - - - - - C C A G A T     | A A C C T A | A G T [A] G G | P19                                                   | No  |
| Moroberekan        | Africa              | L | U | -              | G G C C C T | G A C C T C A C A C C G G C G T Y A G       | G G G C T C G T G T G T   | G G G A G C G G G | G C G C C T T T T | G G G T A A -   | G G C C G A - - - - - - - C T A G A T     | A A C C C G | A G T [A] G G | P19                                                   | -   |
| Muha               | India               | U | P | -              | A G C - C A | T G C C T C A C C C G G C G T C T G G       | G G G C T C G T G T G T   | G G G A A T G G G | G C C C G T A T   | G G G C A A A   | G G C T G C - - - - - - - C T A G A T     | A T A C C G | G A C - G A   | (P20)                                                 | -   |
| Mutsuohomare       | † Japan (Aomori)    | I | P | Pia            | A A C C T T | G G C C A C A C G A C C T T G C G T C G G   | G G G C T C G T G T G T   | G G G A G C G G G | G C G C T T T G   | G C C C A A A   | G C C C G C C C C G T A A C T C G G G T   | A A C C T A | A G T [A] G G | Pish Pia Pik-s P19                                    | Yes |
| Naba               | India               | L | P | -              | G G C C C T | G G C T T C A T C A C C G G C T C T A G     | G G C C T C A T G T G T   | G G G G C A T G   | G G G G C G T A T | G G C C - A S   | G C C C A C C A - C T T A C T C A G A T   | A T C C C G | G G T [A] G G | Pii Pia Pik-s P19                                     | -   |
| Nagoyutaka         | † Japan (Niigata)   | I | P | Pii            | A A C C C A | G G C C A C A C G A C C C T G C G T C G G   | G G G C T C G T G T G T   | G G G A G C G G G | G G G G T G A A T | G G G C A A A   | G C C C G C C C C G T A A C T C G G G T   | A A C C T A | A G T [A] G G | Pish Pii Pik-s P19                                    | Yes |
| Nakateshinsebon    | † Japan (Aichi)     | I | P | Pia            | A A C C C A | G A T C T C A C A C C T T G C G T C G G     | G A C C T C G T A A G A   | G G G A G C G G G | G C G C C T T T G | G C C C A A G   | G C C C G C C C C G T A A C T C G G G T   | A A C C C G | A G T [A] G G | Pia Pik-s P19                                         | Yes |
| Nanatusuboshi      | † Japan (Hokkaido)  | I | P | Pii Pia        | A A C C T T | G G C C A C A C G A C C C T G C G T C G G   | G A C C T C G T A A G A   | A G A A C G G G G | G G G G T G A A T | G C C C A A A   | A G C C G A - - - - - - - C C A G A T     | A A C C C G | A G T [A] G G | Pish Pii Pia P19                                      | Yes |
| Nasuhikari         | † Japan (Tochigi)   | I | P | Pii Pia        | A A C C T T | G G C C A C A C G A C C T T G C G T C G G   | G G G C T C G T G T G T   | G G G A G C G G G | G G G G T G A A T | G C C C A A G   | G C C C G C C C C G T A A C T C G G G T   | A A C C T A | A G T [A] G G | Pish Pii Pia Pik-s P19                                | Yes |
| Natsusoba          | Japan (Niigata)     | I | P | Pib            | A G C A C T | G G C C A C A C G A C C G G T G C T G T     | G G G C T C G T G T G T   | G G G A G C G G G | G C G C C T T T G | G T C C A G C   | G C C C G C C C C G T A A C T C G G G T   | A A C C T A | A G T [A] G G | Pish Pib Pia Pik-s P19                                | No  |
| Natsuhikari        | † Japan (Kagoshima) | I | P | Piz Pii        | A A C C T T | G A T C T C A C C A C T T G C G T C G G     | G A C C T C G T A A A C T | G G G A G C G G A | G G G G T G A A T | G G G C A A A   | G C C C G C C C C G T A A C T C G G G T   | A A C C T A | A G T [A] G G | Piz Pii Pik-s P19                                     | Yes |
| Natsunotayori      | † Japan (Kagoshima) | I | P | Pii            | A A C C T T | G G C C A C A C G A C C T T G C G T C G G   | G G G C T C G T G T G T   | A G G A G C G G G | G G G G T G A A T | G G G C A A A   | G C C C G C C C C G T A A C T C G G G T   | A A C C C G | A G T [A] G G | Pish Pia Pik-s P19                                    | Yes |
| Neang Menh         | Cambodia            | L | P | -              | A G T C C A | T G C T A C C T C G C C G G C T C T A G     | G A C C T C G T A A A C T | G G G A A T G G G | A G T G C G T T T | G T C C A G C   | G G C C G C - - - - - - - A C C C A G A T | C T A C C G | G G T [A] C G | Pit Piz PIS/P13 Pia Pita                              | -   |
| Nepal 555          | India               | U | P | -              | A G C - C A | G G C C A T A C A C C T T G C G T C G G     | G G G C T C G T G T G T   | G G G A A C G T G | G C G C C G T A T | G G G C - A -   | G G C C G A - - - - - - - C T A G A T     | A T A C C G | A G T [A] G G | P19                                                   | -   |
| Nerica 1           | Africa (WARDA)      | I | U | -              | A G C C C T | G A C C T A C C A C C C G T C T C T G T     | G G G C T C G T G T G T   | G G G G T G G G G | G G G G T G T T T | G G G C A A -   | G C C C G C - - - - - - - C T A G A T     | A A C C C G | A G T [A] G G | Pii P19                                               | -   |
| Nihonmasari        | † Japan (Saitama)   | I | P | Pia            | A A C C C A | G A T C T C A C A C C T T G C G T C G G     | G G G C T C G T G T G T   | G G G A G C G G G | G C G C C T T T G | G C C C A A G   | G C C C G C C C C G T A A C T C G G G T   | A A C C T A | A G T [A] G G | Pia P19                                               | Yes |
| Niigatawase        | † Japan (Niigata)   | I | P | Piz            | A A C C C A | G G C C A C A C G A C C C T T G C G T C G G | G A C C T C G T A A C T   | G G G A G C G G G | G C G C C T T T G | G G G C A A A   | G C C C G C C C C G T A A C T C G G G T   | A A C C T A | A G T [A] G G | Pish Piz Pik-s P19                                    | Yes |
| Nikomaru           | † Japan (Fukuoka)   | I | P | Pii Pia        | A A C C T T | G G C C A C A C G A C C T T G C G T C G G   | G G G C T C G T G T G T   | G G G A G C G G A | G G G G T G A A T | G C C C A A G   | G G C C G A - - - - - - - C T A G A T     | A A C C T A | A G T [A] G G | Pish Pii Pia P19                                      | Yes |
| Nipponbare         | † Japan (Aichi)     | I | P | Pia or +       | A A C C C A | G G C C A C A C G A C C T T G C G T C G G   | G G G C T C G T G T G T   | G G G A G C G G A | G C G C C T T T G | G G G C A A A   | G G C C G A - - - - - - - C T A G A T     | A A C C T A | A G T [A] G G | Pish P19                                              | -   |
| Nishaooba          | Japan (Fukuoka)     | I | P | Pia Pik-m      | A A C C T T | G G C C A C A C G A C C G G C G T C A G     | G G G C T C G T G T G T   | A G G A G C G G G | G C G C C T T T G | G C C C A A A   | G C C C G C C C C G G T A A C T C G G G T | A A C C T A | A G T [A] G G | Pish Pia Pik-m P19                                    | Yes |
| Nishihomare        | † Japan (Miyazaki)  | I | P | Pia            | A A C C T T | G G C C A C A C G A C C C T G C G T C G G   | G A C C T C G T A A G A   | G G G A G C G G G | G C G C C T T T G | G C C C A A A   | G G C C G A - - - - - - - C T A G A T     | A A C C C G | A G T [A] G G | Pish Pia P19                                          | Yes |
| Nona Bokra         | India               | L | P | -              | A A C C C A | G G C C T T C A T C A C C G G C G T C G T   | G G G C T G T A A G A     | G G G A A T G G G | G C G C C G T A T | G G G C A A C   | G G C C G C - - - - - - - C T A G A T     | C T A C C G | G G T [A] C G | Piz-t Pita                                            | -   |
| Norin 1            | † Japan (Niigata)   | I | P | +              | A A C C T T | G G C C A C A C G A C C T T G C G T C G G   | G G G C T C G T G T G T   | G G G A G C G G G | G C G C C T T T G | G G G C A A A   | G C C C G C C C C G T A A C T C G G G T   | A A C C T A | A G T [A] G G | Pish Pik-s P19                                        | Yes |
| Norin 18           | † Japan (Kumamoto)  | I | P | Pia            | A A C C T T | G G C C A C A C G A C C T T G C G T C G G   | G G G C T C G T G T G T   | G G G A G C G G G | G C G C C T T T G | G C C C A A A   | G C C C G C C C C G T A A C T C G G G T   | A A C C C G | A G T [A] G G | Pish Pia Pik-s P19                                    | Yes |
| Norin 22           | † Japan (Hyogo)     | I | P | +              | A A C C T T | G G C C A C A C G A C C T T G C G T C G G   | G G G C T C G T G T G T   | G G G A G C G G A | G C G C C T T T G | G G G C A A A   | G G C C G A - - - - - - - C T A G A T     | A A C C T A | A G T [A] G G | Pish P19                                              | Yes |
| Norin 6            | † Japan (Hyogo)     | I | P | +              | A A C C T T | G A T C T C A C C A C C T T G C G T C G G   | G G G C T C G T G T G T   | G G G A G C G G A | G C G C C T T T G | G G G C A A A   | G C C C G C C C C G T A A C T C G G G T   | A A C C T A | A G T [A] G G | Pik-s P19                                             | Yes |
| Norin 8            | † Japan (Hyogo)     | I | P | +              | A A C C C A | G G C C A C A C G A C C T T G C G T C G G   | G A C C T C G T A A G A   | G G G A G C G G G | G C G C C T T T G | G G G C A A A   | G G C C G A - - - - - - - C T A G A T     | A A C C T A | A G T [A] G G | Pish P19                                              | Yes |
| Notohikari         | † Japan (Shikawa)   | I | P | Piz            | A A C C C A | G G C C A C A C G A C C C T G C G T C G G   | G A C C T C G T A A C T   | G G G A G C G G G | G C G C C T T T G | G G G C A A A   | G G C C G A - - - - - - - C T A G A T     | A A C C T A | A G T [A] G G | Pish Piz P19                                          | Yes |
| Oba                | † Japan (Shikawa)   | L | P | -              | A A C C T T | G A C C T C A C A C C T T G C G T C G G     | G A C C T C G T A A G A   | G G G A G C G G G | G C G C C T T T G | G G G C A A A   | A G C C G A - - - - - - - C C A G A T     | A A C C C G | A T - G A     | Yes                                                   | -   |
| Ochikara           | Japan (Niigata)     | I | P | Pik Pita-2     | A A C C T T | G G C C A C A C G A C C C T G C G T C G G   | G G G C T C G T G T G T   | A G G A G C G G G | G C G C C T T T G | G C C C A A A   | G C C C G C C C C G G T A A C T C G G G T | C T A C C G | G G T [B] C A | Pish Pia Pik-m Pita Pita-2                            | No  |
| Odorakimochi       | † Japan (Ibaraki)   | I | P | Pib Pii Pia    | A G C A C T | G G C T A C C T C G C C G G T G C T G T     | G G C C T C G A A A A G T | G G G A A T G G G | G C G C C G T A T | G T C C A G C   | G C C T G C C A C C T T A C T C G G A T   | A T C G C G | G A C - G A   | Pib Pii Pia Pik-s P20                                 | No  |
| Okiniiri           | † Japan (Akita)     | I | P | Pii Pia        | A A C C T T | G G C C A C A C G A C C T T G C G T C G G   | G G G C T C G T G T G T   | G G G A G C G G G | G G G G T G A A T | G C C C A A G   | G C C C G C C C C G T A A C T C G G G T   | A A C C T A | A G T [A] G G | Pish Pii Pia Pik-s P19                                | Yes |
| Omachi             | † Japan (Okayama)   | L | P | +              | A A C C T T | G A T C T C A C A C C C T T G C G T C G G   | G A C C T C G T A A A G A | G G G A G C G G G | G C G C C T T T G | G G G C A A A   | G C C C G C C C C G T A A C T C G G G T   | A A C C T A | A G T [A] G G | Pik-s P19                                             | Yes |
| Onari              | Japan (Ibaraki)     | I | P | Unknown        | A G C A C T | G G C T A C C T C G C C G G T G C T G T     | G G C C T C G A A A A G T | G G G A A T G G G | G C G C C G T A T | G T C C A G C   | G C C T G C C A C C T T A C T C G G A T   | A T C G C G | G A C - G A   | Pib Pia Pik-s P20                                     | -   |
| Oseto              | † Japan (Hiroshima) | I | P | Pia Pita-2     | A A C C C A | G G C C A C A C G A C C C T G C G T C G G   | G G G C T C G T G T G T   | G G G A G C G G G | G C G C C T T T G | G C C C A A G   | G G C C G A - - - - - - - C T A G A T     | C T A C C G | G G T [B] C A | Pish Pia Pita Pita-2                                  | Yes |
| Ouu 197            | Japan (Akita)       | I | P | -              | A A C C T T | G G C C T C A C A C C T T G C G T C G G     | G G G C T C G T G T G T   | A G G A G C G G G | G C G C C T T T G | G C C C A A A   | G C C C G C C C C G T A A C T C G G G T   | A A C C T A | A G T [A] G G | Pia Pik-s P19                                         | -   |
| Ouu 292            | Japan (Akita)       | I | P | -              | A A C C C A | G A T C T C                                 |                           |                   |                   |                 |                                           |             |               |                                                       |     |

(Continued)

| PiNo.4             | Japan(Unknown)     | I | P | Pita-2          | A A C C C A   | G G C C A C A C G A C C T G C G T C G G   | G A C C T C G T A A G A | G G G A G C G G G | G C G C C T T T G | G G G C A A A C | G G C C G A - - - - - C T A G A T         | C T A C C G | G G T [B] C A   | Pish Pita Pita-2                          | Yes |
|--------------------|--------------------|---|---|-----------------|---------------|-------------------------------------------|-------------------------|-------------------|-------------------|-----------------|-------------------------------------------|-------------|-----------------|-------------------------------------------|-----|
| Pinulupot 1        | Philippines        | L | P | -               | G G C C C T   | G G C T T C A T C A C C T G C G T C G G   | G G C C T C G T A A G T | G G G A G C G G G | G C G C C T T T G | G T C C - - C C | G G C C G C - - - - - C T A G A T         | C T A C C G | G G T [B] C A   | Pia Pita Pita-2                           | -   |
| Pokkali            | Sri Lanka          | L | P | -               | A G C A C T   | G G C T T C A T C A C C G G T G T G T     | G G C T T C G T G T G T | G G G A A T A G G | G C G C C G T A T | G G G C A A A - | G G C C G A - - - - - C C A G A T         | A T C - C G | G A C - G A     | P19 (P20)                                 | -   |
| Puluik Arang       | Indonesia          | L | P | -               | G G C C C T   | G G C T T C A T C A C C G G C G T C G T   | G G C T C G A A A G T   | G G G G G C A T G | G C G C C G T A T | G G C C A A A - | - - - - - C T A G A T                     | A T C C C G | G G T [A] G A   | P19                                       | -   |
| Pusur              | India              | I | P | -               | A G C - C A T | G C C T C A C C C G G C G T C G T         | G G C T C G T G T G T   | G G G A G T G T G | G C G C C G T A T | G G C C - A G   | G C C C G C C A - C C T A C T C G G A T   | A T C C G G | G A C - G A     | Pia Pk-p P20                              | -   |
| Qingyu             | Taiwan             | L | P | -               | G G C C C T   | G G C T T C A T C A C C G T C T C T G T   | G G C T C G T A A G T   | G G G A G C G G G | G C G C C G T A T | G T C C - - C   | G C C T G C C A C C T T A C T C G G A T   | A T A C C G | G G T [A] G G   | Pia Pk-s P19                              | -   |
| Qiu Zhao Zong      | China              | L | P | -               | A G C A C T   | G G C T T C A T C A C C G T C T C T G T   | G G C T C G T A A G T   | G G G G G C A T G | G C G C C G T A T | G T C C - - C   | A G C C G C C A - C T A A T T C G G A G   | C T A C C G | G G T [A] C A   | Pia Pk-l Pita                             | -   |
| Rahandam           | India              | U | P | -               | A G C - C A   | G G C T T C A T C A C C G G T C T G G     | G G C T T C G T G T G T | G G G A A T G G G | G C G C C G T A T | G G C C A A A - | G G C C G A - - - - - C C A G A T         | A T C C C G | G G T [A] C A   | P19                                       | -   |
| Rambhog            | Indonesia          | L | P | -               | G G C C C T   | G G C T T C A T C A C C G T C T C T G T   | G A C C T C G T A A G T | G G G A A T G G G | G C G C C G T A T | G G G C A A A - | G C C C G A C A - C C T A C T C G G A T   | C T A C C G | G G T [A] C A   | P17 Pita                                  | -   |
| Rathu Balawee      | Sri Lanka          | L | P | -               | A G C A C T   | G G C T T C A T C A C C G T C T C T G T   | G A C C T C G T A A G T | G G G A A T G G G | G C G C C G T A T | G G G C A A A - | G G C C G A - - - - - C C A G A T         | C T A C C G | G G T [A] C A   | Piz Pita                                  | -   |
| Ratul              | India              | L | P | -               | A G C - C A   | G G C C A T A T C A C C G G C G T Y G T   | G G G T C G T G T G T   | G G G A A T G G G | G C G C C G T A T | G G G C A A A - | - - - - - C T A G A T                     | A T A C C G | G A G T [A] G G | P19                                       | -   |
| Reiho              | † Japan(Fukuoka)   | I | P | Pia Pita-2      | A A C C T T   | G A T C T C A C C A C C T G C G T C G G   | G A C C T C G T A A G A | G G G A G C G G G | G C G C C T T T G | G C C C A A A G | G C C C G C C C C G T A A C T C G G G T   | C T A C C G | G G T [B] C A   | Pia Pk-s Pita Pita-2                      | Yes |
| Reimei             | † Japan(Aomori)    | I | P | Pia             | A A C C C A   | G G C C A C A C A C C T G C G T C G G     | G G G C T C G T G T G T | A G G A G C G G G | G C G C C T T T G | G C C C A A A G | G C C C G C C C C G T A A C T C G G G T   | A A C C T G | A G T [A] G G   | Pish Pia Pk-s P19                         | Yes |
| Reishiko           | China              | L | P | Pik             | A G C A C T   | G A T C T C A C C A C C T G C G T C G G   | G G G C T C G T G T G T | G G G A G C G G G | G C G C C T T T G | G G G T A A A - | G C C C G C C C C G T A A C T C G G G T   | A A C C T G | A G T [A] G G   | Pk-s P19                                  | No  |
| Rexmont            | USA                | I | P | -               | A A C C C A   | T G C T T T A T C G C C G G C T C T A G   | G G C C T C A T G T G T | G G G A G C G G G | G G G T G T T T G | G G G C A A C - | G G C C G A - - - - - C T A G A T         | A A C C C G | A G T [A] G G   | Pii P19                                   | -   |
| Riku 132           | † Japan(Akita)     | I | P | +               | A A C C T T   | G G C C A C A C G A C C T G C G T C G G   | G G G C T C G T G T G T | A G G A G C G G G | G G C C C T T T G | G G G C A A A C | G C C C G C C C C G T A A C T C G G G T   | A A C C C G | A G T [A] G G   | Pish Pk-s P19                             | Yes |
| Ryou Suisan Koumai | China              | L | P | -               | A G C - C A   | G G C T T C A T C A C C G T C T C T G G   | G G C T C G T A A G T   | G G G A A T A G G | G C G C C G T A T | G T C C A G C - | G G C C A C C A - C T T A C T C A G A T   | C T A C C G | G G T [A] C A   | Pia New gene(Pik_H04-3) <sup>1</sup> Pita | -   |
| Sakihikari         | † Japan(Fuku)      | I | P | Pii Pia         | A A C C C A   | G G C C A C A C G A C C T G C G T C G G   | G G G C T C G T G T G T | G G G A G C G G G | A G G G T G A A T | G C C C A A A G | G C C C G C C C C G T A A C T C G G G T   | A A C C T A | A G T [A] G G   | Pish Pii Pia Pk-s P19                     | Yes |
| Saltstar           | Japan(Ibaraki)     | I | P | Pib             | A G C A C T   | G G C T T C A T C A C C G G T G C T G T   | G G G T C G T G T G T   | G G G A G C G G G | G C G C C G T A T | G G G C A A C - | G C C C G C C A C C T T A C T C G G A T   | A A C C C G | A G T [A] G G   | Pib Pk-s P19                              | -   |
| Sasanishiki        | † Japan(Miyagi)    | I | P | Pia             | A A C C T T   | G G C C A C A C G A C C T G C G T C G G   | G G G C T C G T G T G T | G G G A G C G G G | G C G C C T T T G | G C C C A A A G | G C C C G C C C C G T A A C T C G G G T   | A A C C T A | A G T [A] G G   | Pish Pia Pk-s P19                         | Yes |
| Sasanishiki B1.2   | † Japan(Miyagi)    | I | P | Pia Pk-m        | A A C C T T   | G G C C A C A C G A C C T G C G T C G G   | G G G C T C G T G T G T | G G G A G C G G G | G C G C C T T T G | G C C C A A A G | G C C C G C C C C G T A A C T C G G G T   | A A C C T A | A G T [A] G G   | Pish Pia Pk-m P19                         | Yes |
| Sasanishiki B1.3   | † Japan(Miyagi)    | I | P | Piz Pia         | A A C C T T   | G G C C A C A C G A C C T G C G T C G G   | G A C C T C G T A A G T | G G G A G C G G G | G C G C C T T T G | G C C C A A A G | G C C C G C C C C G T A A C T C G G G T   | A A C C T A | A G T [A] G G   | Pish Piz Pia Pk-s P19                     | Yes |
| Satajiman          | † Japan(Ibaraki)   | I | P | Pia             | A A C C C A   | G A T C T C A C A C C T G C G T C G G     | G G G C T C G T G T G T | G G G A G C G G G | G C G C C T T T G | G C C C A A A G | G G C C G A - - - - - C T A G A T         | A A C C T G | A G T [A] G G   | Pia P19                                   | Yes |
| Sekiyama           | † Japan(Aomori)    | L | P | Pia or +        | A A C C T T   | G G C C A C A C G A C C T G C G T C G G   | G A C C T C G T A A G A | A G G A G C G G G | G G G G T G A A T | G G G C A A A C | G C C C G C C C C G T A A C T C G G G T   | A A C C C G | A G T [A] G G   | Pish Pii Pk-s P19                         | No  |
| Sen-ichi           | † Japan(Unknown)   | L | P | Pii or Pia or + | A A C C T T   | G G C C A C A C G A C C G G T G C T G T   | G G G C T C G T G T G T | G G G A G C G G G | G C G C C T T T G | G G C C A A A G | G C C C G C C C C G T A A C T C G G G T   | A A C C T A | A G T [A] G G   | Pish Pib Pia Pk-s P19                     | No  |
| Sensho             | † Japan(Tokyo)     | L | U | Pia or +        | G G C C C T   | G A C C T C A C C A C T T G C G T C G G   | G G C C T A C T G T G T | G G G A G C G G G | G C G C C G T T T | G G G T A A -   | G G C C G A - - - - - C T A G A T         | A A C C C G | A G T [A] G G   | P19                                       | -   |
| Setononji          | † Japan(Yamaguchi) | I | P | Pii Pia         | A A C C T T   | G G C C A C A C G A C C T T G C G T C G G | G G G C T C G T G T G T | G G G A G C G G G | A G G G T G A A T | G C C C A A A G | G C C C G C C C C G T A A C T C G G G T   | A A C C T A | A G T [A] G G   | Pish Pii Pia Pk-s P19                     | -   |
| Shin 2             | † Japan(Niigata)   | I | P | +               | A A C C T T   | G G C C A C A C G A C C T T G C G T C G G | G G G C T C G T G T G T | G G G A G C G G G | G C G C C T T T G | G G G C A A A C | G C C C G C C C C G T A A C T C G G G T   | A A C C T G | A G T [A] G G   | Pish Pk-s P19                             | Yes |
| Shinrei            | † Japan(Miyagi)    | L | P | Pia             | A A C C T T   | G G C C A C A C G A C C T G C G T C G G   | G G G C T C G T G T G T | G G G A G C G G G | G C G C C T T T G | G C C C A A A G | G C C C G C C C C G T A A C T C G G G T   | A A C C C G | A G T [A] G G   | Pish Pia Pk-s P19                         | Yes |
| Shinriki           | † Japan(Hyogo)     | L | P | +               | A A C C T T   | G A C T C A C C A C C T G C G T C G G     | G G G C T C G T G T G T | G G G A G C G G G | G C G C C T T T G | G G G C A A A C | G C C C G C C C C G T A A C T C G G G T   | A A C C C G | A G T [A] G G   | Pk-s P19                                  | Yes |
| Shinsu             | † Japan(Nagano)    | L | P | +               | A A C C T T   | G G C C A C A C G G A C T G C G T C G G   | G A C C T C G T A A G A | G G G A G C G G G | G C G C C T T T G | G G G C A A A C | G C C C G C C C C G T A A C T C G G G T   | A A C C T G | A G T [A] G G   | Pk-s P19                                  | Yes |
| Shintaishomochi    | † Japan(Toyama)    | I | P | +               | A A C C C A   | G G C C A C A C G G A C T G C G T C G G   | G G G C T C G T G T G T | G G G A G C G G G | A G C C C T T T G | G G G C A A A C | A G C C G A - - - - - C C A G A T         | A A C C T A | A G T [A] G G   | P19                                       | Yes |
| Shinyamabuki       | † Japan(Aichi)     | I | P | +               | A A C C T T   | G G C C A C A C G A C C T G C G T C G G   | G A C C T C G T A A G A | G G G A G C G G G | G C G C C T T T G | G G G C A A A C | G C C C G C C C C G T A A C T C G G G T   | A A C C T A | A G T [A] G G   | Pish Pk-s P19                             | Yes |
| Shonai 29          | Japan(Yamagata)    | I | P | -               | A A C C T T   | G G C C A C A C G A C C T G C G T C G G   | G G G C T C G T G T G T | G G G A G C G G G | G G G G T G A A T | G C C C A A A G | G C C C G C C C C G T A A C T C G G G T   | A A C C T G | A G T [A] G G   | Pish Pii Pia Pk-s P19                     | -   |
| Shoni              | Bangladesh         | L | P | -               | A G C - C A T | G C C T C A C C G C C T G C G T C G T     | G G C T C G T G T G T   | G G G A A C G T G | A G T G C G T A T | G G C C - A G   | G C C C G C C A - C C T A C T C G G A T   | A T A C C G | G G T [A] G G   | P15/P13 Pia Pk-p P19                      | -   |
| Shuusoushu         | China              | L | P | -               | A G C A C T   | G G C T T C A T C A C C G T C T C T G T   | G G C T C G T A A G T   | G G G G G C A T G | G C G C C G T A T | G T C C - C C   | A G C C G C C A - C T A A T T C G G A G   | C T A C C G | G G T [A] C A   | Pia Pk-l Pita                             | -   |
| Shwe Nang Gyi      | Myanmar(Burma)     | L | P | -               | A G C A C T   | T G C T T A T C G C C T G C T C G T       | G G G T C G T G T G T   | G G G A A T G G G | G C G C C G T A T | G T C C - C C   | G G C C G A - - - - - C C A G A T         | A A C C C G | A G T [A] G G   | P19 Pia P19                               | -   |
| Silewah            | Indonesia          | L | P | -               | G G C C C T   | G A C C T C A C C A C C T G C G T C G G   | G G G C T C A T G T G T | G G G A G C G G G | G C G C C T T T G | G G G T A A -   | G G C C G A - - - - - C T A G A T         | A A C C C G | A G T [A] G G   | P19                                       | -   |
| Simedan            | Indonesia          | L | P | -               | G G C C C T   | G A C C T C A C C A C C T G C G T C G G   | G G G C T C G T G T G T | G G G A G C G G G | G C G C C T T T G | G G G T A A -   | G G C C G C - - - - - C T A G A T         | A T C C C G | G G T [A] G A   | P19                                       | -   |
| StNo.1             | Japan(Hiroshima)   | I | P | +               | A A C C C A   | G G C C A C A C G A C C T G C G T C G G   | G A C C T C G T A A G A | G G G A G C G G G | G C G C C T T T G | G G G C A A A C | G G C C G A - - - - - C T A G A T         | A A C C T A | A G T [A] G G   | Pish P19                                  | Yes |
| Surjamukhi         | India              | I | P | -               | A G C - C A T | G C C T C A C C G C G G C G T Y G T       | G G C T C G T G T G T   | G G G A A T G G G | G C G C C G T A T | G G G C A A A - | G C C C G C C A - C C T A C T C G G A T   | A T C G C G | G A C - G A     | Pk-p P20                                  | -   |
| Suweon 258         | Korea              | I | P | -               | A G C A C T   | G G C T A C C T C G C C G G T G T G T     | G G C C T C G A A A G T | G G G G G C A G T | G C G C C G T A T | G T C C A G C - | G C C C G C C A C C C T T A C T C G G A T | A T C G C G | G A C - G A     | Pib Pia Pk-s P20                          | -   |
| Tachiaoba          | Japan(Fukuoka)     | I | P | Pii Pia         | A A C C T T   | G G C C A C A C G A C C T G C G T C G G   | G G G C T C G T G T G T | G G G A G C G G G | G G G G T G A A T | G C C C A A A G | G G C C G A - - - - - C T A G A T         | A A C C C G | A G T [A] G G   | Pish Pii Pia P19                          | Yes |
| Tachiaoyaka        | Japan(Hiroshima)   | I | P | Unknown         | A A C C T T   | G G C C A C A C G A C C G G T G C T G T   | G G C T C G T G T G T   | A G G A G C G G G | G C G C C T T T G | G G G C A A A C | G C C C G C C C C G T A A C T C G G G T   | A A C C T A | A G T [A] G G   | Pish Pii Pk-m P19                         | -   |
| Tachiharuka        | Japan(Fukuoka)     | I | P | Pii             | A A C C T T   | G G C C A C A C G A C C T G C G T C G G   | G G G C T C G T G T G T | G G G A G C G G G | G G G G T G A A T | G G G C A A A C | G G C C G A - - - - - C T A G A T         | A A C C T A | A G T [A] G G   | Pish Pii P19                              | Yes |
| Tachihayate        | Japan(Ibaraki)     | I | P | Unknown         | A A C C T T   | G G C C A C A C G A C C G G T G C T G T   | G G G C T C G T G T G T | A G G A G C G G G | G C G C C T T T G | T C C A G C -   | G C C C G C C C C G T A A C T C G G G T   | A A C C T A | A G T [A] G G   | Pish Pii Pia Pk-m P19                     | -   |
| Tachijobu          | Japan(Hokkaido)    | I | P | Pii Pia         | A G C C C T   | G A T C T C A C C A C C T G C G T C G G   | G A C C T C G T A A G A | A G C A G C G G G | G G G G T G A A T | G C C C A A A G | G G C C G A - - - - - C T A G A T         | A A C C C G | A G T [A] G G   | Pii Pia P19                               | Yes |
| Tachisugata        | Japan(Ibaraki)     | I | P | Pib             | A G C A C T   | G G C T A C C T C C C G G T G C T G T     | G G G C T C G T G T G T | G G G A G C G G G | G G G G T G A A T | T C C A G C -   | G C C C G C C A C C T T A C T C G G A T   | A A C C C G | A G T [A] G G   | Pib Pii Pia Pk-s P19                      | No  |
| Tachisuzuka        | Japan(Hiroshima)   | I | P | Pib Pita P20    | A G C A C T   | G A T C T C A C C A C C G G T G C T G T   | G A C C T C G T A A G A | A G G A G C G G G | G C G C C T T T G | G G G C A A A C | G G C C G A - - - - - A C C C A G A T     | A T C G C G | G A C - G A     | Pib P20                                   | No  |
| Tadukan            | Philippines        | L | P | -               | G G C C C T   | G G C T T C A T C A C C G G C G T C G G   | G G C C T C G T A A G T | G G G G G C A T G | G C G C C T T T G | G T C C - - C C | G G C C G C C C C G T A T C T C G G G T   | C T A C C G | G G T [B] C A   | Pia Pita Pita-2                           | -   |
| Taichung 65        | Taiwan             | I | P | +               | A A C C T T   | G G C C A C A C G A C C T G C G T C G G   | G A C C T C G T A A G A | G G G A G C G G G | G C G C C T T T G | G G G C A A A C | G C C C G C C C C G T A A C T C G G G T   | A A C C T G | A G T [A] G G   | Pish Pk-s P19                             | Yes |
| Tainung 67         | Taiwan             | I | P | Unknown         | A G C A C T   | G G C T T A T C G C C T G C G T C G G     | G A C C T C G T A A G A | A G G A G C G G G | G G G G T G A A T | G C C C A A A G | G C C C G C C C C G T A A C T C G G G T   | A A C C T G | A G T [A] G G   | Pii Pia Pk-s P19                          | -   |
| Takanari           | Japan(Ibaraki)     | I | P | Unknown         | A G C A C T   | G G C T A C C T C G C C G G T G C T G T   | G G C T C G A A A G T   | G G G A A T G G G | G C G C C G T A T | G T C C A G C - | G C C T G C C A C C T T A C T C G G A T   | A T C G C G | G A C - G A     | Pib Pia Pk-s P20                          | -   |
| Takedawase         | † Japan(Okayama)   | L | P | +               | A A C C T T   | G A T C T C A C C A C C T G C G T C G G   | G G G C T C G T G T G T | G G G A G C G G G | G C G C C T T T G | G G G C A A A C | G C C C G C C C C G T A A C T C G G G T   | A A C C T G | A G T [A] G G   | Pk-s P19                                  | Yes |
| Taporuri           | Taiwan             | L | U | -               | A G C A C T   | G G C T T C A T C A C C G G T C T A G G   | G G C C T A C T G T G T | G G G A A T G G G | G C G C C G T A T | G T C C A A C - | G G C C G A - - - - - C C A G A T         | C T A C C G | G G T [A] C A   | Pia Pita                                  | -   |
| Te-tep             | Vietnam            | I | P | -               | G G C C C T   | G G C T T C A T C A C C G G C G T C G G   | G G G C T C G T A A G T | G G G G G C A T G | G C G C C G T A T | G T C C - - C   | G G C C G C C C C G T A T C T C G G G T   | C T A C C G | G G T [B] C A   | Pia P11 Pita Pita-2                       | -   |
| Tentakaku          | † Japan(Toyama)    | I | P | Piz Pii         | A A C C T T   | G G C C A C A C G A C C T G C G T C G G   | G A C C T C G T A A G T | G G G A G C G G G | G G G G T G A A T | G G G C A A A C | G G C C G A - - - - - C T A G A T         | A A C C T G | A G T [A] G G   | Pish Piz Pii P19                          | Yes |
| Tima               | Bhutan             | L | P | -               | A A C C T T   | G A C C T C A C C A C C G G G C T Y G T   | G G G C T C G T G T G T | G G G A G C G G G | G G G G T G A A T | G G G C A A A - | G G C C G A - - - - - C T A G A T         | A T A C C G | G A C - G A     | Pii (P20)                                 | -   |
| Toboshi            | † Japan(Kagoshima) | L | P | -               | A G C - C A   | G G C T T C A T C A C C G T C T C T G G   | G G G C T C G T G T G T | G G G A G C G G G | G C G C C G T A T | G T C C A G C - | G G C C G C - - - - - C C A G A T         | C T A C C G | G G T [A] C A   | Pia Pita                                  | -   |
| Tochiginohoshi     | † Japan(Tochigi)   | I | P | Pii Pia         | A A C C T T   | G G C C A C A C G A C C T G C G T C G G   | G G G C T C G T G T G T | A G G A G C G G G | G C G C C T T T G | G C C C A A A G | G C C C G C C C C G T A A C T C G G G T   | A A C C T A | A G T [A] G G   | Pish Pia Pk-s P19                         | No  |
| Todorokiwase       | † Japan(Niigata)   | I | P | Pii             | A A C C T T   | G G C C A C A C G A C C T G C G T C G G   | G G G C T C G T G T G T | G G G A G C G G G | G G G G T G A A T | G G G C A A A C | G C C C G C C C C G T A A C T C G G G T   | A A C C T G | A G T [A] G G   | Pish Pii Pk-s P19                         | Yes |
| Togaome            | † Japan(Toyama)    | I | P | Pii             | A A C C T T   | G G C C A C A C G A C C T T G C G T C G G | G G G C T C G T G T G T | G G G A G C G G G | G G G G T G A A T | G G G C A A A C | G G C C G A - - - - - C T A G A T         | A A C C T A | A G T [A] G G   | Pish Pii P19                              | Yes |
| Tomomemari         | † Japan(Hokkaido)  | I | P | +               | A A C C T T   | G G C C A C A C G A C C T T G C G T C G G | G G G C T C G T G T G T | G G G A G C G G G | G C G C C T T T G | G G G C A A A C | A G C C G A - - - - - C C A G A T         | A A C C C G | A G T [A] G G   | Pish P19                                  | Yes |
| Tomohonami         | † Japan(Aichi)     | I | P | +               | A A C C T T   | G G C C A C A C G A C C T T G C G T C G G | G G G C T C G T G T G T | G G G A G C G G G | G G G G T G A A T | G G G C A A A C | G C C C G C C C C G T A A C T C G G G T   | A A C C T A | A G T [A] G G   | Pish Pii Pk-s P19                         | No  |
| Toride 1           | Japan(Kanagawa)    | I | P | Piz-t           | A A C C C A   | G G C C A C A C G A C C T G C G T C G G   | G G G C T G T A A G T   | G G G A A T A G G | G C G C C T T T G | G G G C A A A C | G G C C G A - - - - - C T A G A T         | A A C C T A | A G T [A] G G   | Pish Piz-t P19                            | Yes |
| Toyomeki           | Japan(Ibaraki)     | I | P | Pib (Pii Pia)   | A A C C T T   | G A T C T C A C C A C C G G T G C T G T   | G A C C T C G T A A G A | A G G A G C G G G | G G G G T G A A T | G C C C A A A G | G C C C G C C C C G T A A C T C G G G T   | A A C C T G | A G T [A] G G   | Pib Pii Pia Pk-s P19                      | -   |
| Tozan 38           | † Japan(Gifu)      | I |   |                 |               |                                           |                         |                   |                   |                 |                                           |             |                 |                                           |     |

(Continued)

|                    |                   |   |   |                          |                                                                                                                                                                                                   |                                                           |     |
|--------------------|-------------------|---|---|--------------------------|---------------------------------------------------------------------------------------------------------------------------------------------------------------------------------------------------|-----------------------------------------------------------|-----|
| Tsuyahime          | † Japan(Yamagata) | I | P | <i>Pii Pik</i>           | A A C C T T G G C C A C A C G A C T T G C G T C G G G G G C T C G T G T G T G G G A G C G G A G G G T G A A T G G C C A A A C G C C C G C C C G G T A A C T C G G G T A A C C T G A G T [A] G G   | <i>Pish Pii Pik-m P19</i>                                 | No  |
| Tsuyotome          | † Japan(Fukuoka)  | I | P | <i>Pii</i>               | A A C C C A G G C C A C A C G A C C T G C G T C G G G G G C T C G T G T G T G G G A G C G G A G G G T G A A T G G C C A A A C G C C C G C - - - - - C T A G A T A A C C T A A G T [A] G G         | <i>Pish Pii P19</i>                                       | Yes |
| Tsuyuke            | † Japan(Nara)     | I | P | <i>Pik-m</i>             | A A C C C A G A T C T C A C C A C C T G C G T C G G G A C C T C G T A A G A G G G A G C G G G G C G C C T T T G G G C C A A A C G C C C G C C C G G T A A C T C G G G T A A C C T G A G T [A] G G | <i>Pik-m P19</i>                                          | Yes |
| Tupa 121-3         | Bangladesh        | L | P | -                        | A G C - C A T G C C T C A C C G C G G G C G T Y G T G G G C T C G T G T G T G G G A A T G G G G C G C G T A T G G G C A A A - G G C T G C - - - - - C T A G A T A T A C C G A G T [A] G G         | <i>P19</i>                                                | -   |
| Tupa729            | Bangladesh        | L | P | -                        | A A C C C A G A C C T C A C C A C C G G C G T T G T G G C C G T G T A A G T G G G A G C G G G G C G C C T T T G G G T A A - G G C C G C - - - - - A C C C A G A T A T C G C G G A C - G A         | <i>Piz-t P120</i>                                         | -   |
| Urasan 1           | † Japan(Tochigi)  | L | U | +                        | A G C - C A G A C C T C A C C A C T T G C G T C G G G G C C T C A T G T G T G G G G T G G G G C G C C G T T T C G C C C A A G A G C C G A - - - - - A C C C A G A T A A C C C G A G T [A] G G     | <i>Pia P19</i>                                            | No  |
| Vandaran           | Sri Lanka         | L | P | -                        | A G C A C T G G C T T C A T C A C C T G C T C T G T G A C C T C G T A A C T G G G A A T G G G G C G C C G T A T - G G C A A A - G G C C G A - - - - - C C A G A T A T C C C G G G T [A] C A       | <i>Piz</i>                                                | -   |
| Yamabiko           | † Japan(Mie)      | I | P | <i>Pia</i>               | A A C C T T G A T C T C A C C A C C T G C G T C G G G A C C T C G T A A G A G G G A G C G G A G C G C C T T T G C G C C C A A G G G C C G A - - - - - C T A G A T A A C C T G A G T [A] G G       | <i>Pia P19</i>                                            | Yes |
| Yamadanishiki      | † Japan(Hyogo)    | I | P | +                        | A A C C T T G A T C T C A C C A C C T G C G T C G G G A C C T C G T A A G A G G G A G C G G G G C G C C T T T G G G C C A A A C G C C C G C C C C G T A A C T C G G G T A A C C T G A G T [A] G G | <i>Pik-s P19</i>                                          | Yes |
| Yamadawara         | Japan(Ibaraki)    | I | P | <i>Pib (Pii Pia Pik)</i> | A A C C T T G A T C T C A C C A C C G G T G C T G T G A C C T C G T A A G A G A G A G C G G G G C G C C T T T G C G C C C A A G G C C C G C C A C C T T A C T C G G A T A A C C T G A G T [A] G G | <i>Pib Pia Pik-s P19</i>                                  | -   |
| Yamagata 95        | † Japan(Yamagata) | I | P | <i>Pia</i>               | A A C C T T G G C C A C A C G A C T T G C G T C G G G G G C T C G T G T G T G G G A G C G G A G C G C C T T T G C G C C C A A G G C C C G C C C C G T A A C T C G G G T A A C C T G A G T [A] G G | <i>Pish Pia Pik-s P19</i>                                 | Yes |
| Yamanoshizuku      | † Japan(Miyagi)   | I | P | <i>Pii</i>               | A A C C T T G G C C A C A C G A C T T G C G T C G G G G G C T C G T G T G T G G G A G C G G A G G G T G A A T G G G C A A A C G C C C G C C C C G T A A C T C G G G T A A C C T G A G T [A] G G   | <i>Pish Pii Pik-s P19</i>                                 | Yes |
| Yamasenishiki      | † Japan(Akita)    | I | P | +                        | A A C C T T G G C C A C A C G A C C T G C G T C G G G G G C T C G T G T G T G G G A G C G G G G C G C C T T T G G G C C A A A C G C C C G C C C C G T A A C T C G G G T A A C C T G A G T [A] G G | <i>Pish Pik-s P19</i>                                     | Yes |
| Yamatokikara       | † Japan(Chiba)    | I | P | <i>Pii</i>               | A A C C C A G A C C T C A C C A C C T G C G T C G G G G G C T C G T G T G T G G G A G C G G G G G G T G A A T G G G C A A A C A G C C G A - - - - - C C A G A T A A C C T G A G T [A] G G         | <i>Pii P19</i>                                            | Yes |
| Yashinomochi       | † Japan(Shimane)  | I | P | <i>Pita</i>              | A A C C C A G A T C T C A C C A C C T G C G T C G G G A C C T C G T A A G A G G G A G C G G G G C G C C T T T G G G C A A A C G G C C G A - - - - - C T A G A T C T A C C G G G T [A] C A         | <i>Pita</i>                                               | Yes |
| Yatanomochi        | Japan(Ibaraki)    | I | P | Unknown                  | A G C A C T G A T C T C A C C A C C G G T G C T G T G G G C T C G T G T G T A G G A G C G G G G G G T G A A T C G C C C A A G G C C C G C C C C G T A A C T C G G G T A T C C C G G G T [A] G G   | <i>Pib Pii Pia Pik-s P19</i>                              | -   |
| Yukigesho          | † Japan(Yamagata) | I | P | <i>Pik</i>               | A A C C T T G G C C A C A C G A C C T G C G T C G G G G G C T C G T G T G T G G G A G C G G G G C G C C T T T G C G C C C A A G A G T C G C G A C G T A A T T C G G A G A A C C T A A G T [A] G G | <i>Pish Pia Pik P19</i>                                   | No  |
| Yukihimehataemochi | † Japan(Shiga)    | I | P | +                        | A A C C T T G G C C A C A C G A C T G C G T C G G G G G C T C G T G T G T G G G A G C G G G G C G C C T T T G G G C C A A A C G C C C G C C C C G T A A C T C G G G T A A C C C G A G T [A] G G   | <i>Pik-s P19</i>                                          | Yes |
| Yukisayaka         | † Japan(Hokkaido) | I | P | <i>Pii Pia Pik</i>       | A A C C T T G G C C A C A C G A C T T G C G T C G G G A C C T C G T A A G A G C A G C G G G G G G T G A A T G G C C A A C A G T C G C A C G T A A T T C G G A G A A C C T G A G T [A] G G         | <i>Pish Pii Pia Pik P19</i>                               | Yes |
| Yumeakari          | † Japan(Aomori)   | I | P | <i>Pii Pia</i>           | A A C C T T G G C C A C A C G A C C T G C G T C G G G G G C T C G T G T G T G G G A G C G G G G G G T G A A T G C C C A A A C G C C C G C C C C G T A A C T C G G G T A A C C T G A G T [A] G G   | <i>Pish Pii Pia Pik-s P19</i>                             | Yes |
| Yumesoba           | Japan(Niigata)    | I | P | <i>Pib Pita-2</i>        | A G C A C T G G C C A C A C G A C C G G T G C T G T G G G C T C G T G T G T G G G A G C G G G G C G C C T T T G T C A G C C C C C G C C C G T A A C T C G G G T A T C G C G G A C - G A           | <i>Pish Pib Pia Pik-s P120</i>                            | No  |
| Yumehikari         | † Japan(Fukuoka)  | I | P | +                        | A A C C T T G G C C A C A C G A C C T G C G T C G G G G G C T C G T G T G T G G G A G C G G A G C G C C T T T G G G C C A A A C G G C C G A - - - - - C T A G A T A A C C T A A G T [A] G G       | <i>Pish P19</i>                                           | Yes |
| Yumehitachi        | † Japan(Ibaraki)  | I | P | +                        | A A C C T T G G C C A C A C G A C C T G C G T C G G G G G C T C G T G T G T G G G A G C G G A G C G C C T T T G G G C C A A A C G C C C G C C C C G T A A C T C G G G T A A C C T G A G T [A] G G | <i>Pish Pik-s P19</i>                                     | Yes |
| Yumematsuri        | † Japan(Aichi)    | I | P | <i>Pii Pia</i>           | A A C C C A G G C C A C A C G A C C T G C G T C G G G G G C T C G T G T G T G G G A G C G G G G G G T G A A T G C C C A A G G G C C G A - - - - - C T A G A T A A C C C G A G T [A] G G           | <i>Pish Pii Pia P19</i>                                   | Yes |
| Yumehatamochi      | † Japan(Ibaraki)  | I | U | +                        | G G C C C T G A C C T C A C C A C T T G C G T C G G G G C C T C A T G T G T G G G G T G G G G C G C C T T T G G G G T A A - G C C C G C C C C G T A A C T C G G G T A A C C C G A G T [A] G G     | <i>Pik-s P19</i>                                          | Yes |
| Yumepirika         | † Japan(Hokkaido) | I | P | <i>Pii Pik</i>           | A A C C T T G G C C A C A C G A C T T G C G T C G G G A C C T C G T A A G A G C A G C G G G G G G T G A A T G G C C A A A C A G T C G C A C G T A A T T C G G A G A A C C T G A G T [A] G G       | <i>Pish Pii Pik P19</i>                                   | Yes |
| Yumetoiro          | Japan(Niigata)    | I | P | Unknown                  | A G C A C T G G C T A C C T G C C G G T G C T G T G G C G T G T A A G T G G G G C A T G C G G C G T A - G T C C A G C G G C C A C C A - C T T A C T C A G A T A T C G C G G A C - G A             | <i>Pib Piz-t Pia New gene(Pik_H04-3)<sup>†</sup> P120</i> | -   |
| Yumetsukushi       | † Japan(Fukuoka)  | I | P | <i>Pii</i>               | A A C C T T G G C C A C A C G A C C T G C G T C G G G G G C T C G T G T G T G G G A G C G G A G G G T G A A T G G G C A A A C G C C C G C C C G T A A C T C G G G T A A C C T G A G T [A] G G     | <i>Pish Pii Pik-s P19</i>                                 | Yes |
| Zenith             | USA               | I | P | <i>Piz Pia</i>           | A G C C C T G A T C T C A C C A C C T G C G T C G G G A C C T C G T A A C T G G G A G C G G G G C G C C T T T G T C C - - C G G C C G C - - - - - A C C C A G A T A A C C T G A G T [A] G G       | <i>Piz Pia P19</i>                                        | Yes |

Varieties that are in red type are reference varieties for the resistance allele listed in the column "Genotype estimate in public databases".

Varieties marked with a dagger (†) are *japonica* varieties that were used to calculate rate of concordance of the genotypes for blast resistance between the present study and publicly available data. Three alleles (*Pish*, *Pik-s*, *P19*), which were not in the publicly available data, were excluded from calculation.

<sup>a</sup> L, Landrace; I, Improved cultivar; U, Unknown

<sup>b</sup> P, Paddy rice; U, Upland rice

<sup>c</sup> Serial number in each locus

<sup>d</sup> Serial number in BRA1

<sup>e</sup> [A] indicates allele type "AAAAACCAG" and [B] indicates "TG".

<sup>†</sup> Resistance alleles in bold type are the target alleles in the reference variety (Table 3). *Pik-f* is an allele from 'Ujijangxintuanheigu' (Singh et al. 2015). Resistance alleles marked with a double dagger (†) were discriminated from the known resistance alleles based on inoculation tests using additional isolates for the *Pik* locus (Supplemental Table 5).

**Supplemental Table 2.** Estimation of race-specific resistance alleles in two CSSLs, SL519 and SL521, which carry the *Piz* locus from 'Nona Bokra'

| <i>Pyricularia oryzae</i> |                    |                              |                              |                            |                            |
|---------------------------|--------------------|------------------------------|------------------------------|----------------------------|----------------------------|
|                           |                    | <i>Piz-5</i><br>differential | <i>Piz-t</i><br>differential | <i>Piz</i><br>differential |                            |
| Race                      | 437.1              | 477.1                        | 003.0                        | 037.1                      | Resistance genotype        |
| Isolate name              | IW81-04            | Ai74-134                     | Ken54-04                     | 24-22-1-1                  |                            |
| MAFF number <sup>a</sup>  | MAFF101532         | MAFF101533                   | MAFF101507                   | MAFF101519                 |                            |
| Variety                   | + <sup>b</sup>     | <i>AvrPiz5</i>               | <i>AvrPizt</i>               | <i>AvrPiz5 AvrPizt</i>     |                            |
| IRBLz5-CA                 | S (4) <sup>c</sup> | R (1)                        | Undecidable (2)              | R (0)                      | <i>Piz-5</i> (reference)   |
| IRBLzt-T-19F              | S (4)              | S (5)                        | R (0)                        | R (0)                      | <i>Piz-t</i> (reference)   |
| LTH                       | S (4)              | S (4)                        | S (4)                        | S (5)                      | + (reference) <sup>b</sup> |
| SL519                     | S (3)              | S (5)                        | R (0)                        | R (0)                      | <b><i>Piz-t</i></b>        |
| SL521                     | S (4)              | S (4)                        | R (0)                        | R (0)                      | <b><i>Piz-t</i></b>        |

<sup>a</sup> Accession numbers at the Genetic Resources Center, National Agriculture and Food Research Organization, Japan (<https://www.gene.affrc.go.jp/>).

<sup>b</sup> Plus signs indicate absence of resistance alleles or avilurent genes.

<sup>c</sup> Numbers in parentheses indicate *Pyricularia oryzae* the disease score: 0 to 2 are resistant (R), 3 to 5 are susceptible (S) responses.

**Supplemental Table 3.** Primers used for direct sequencing of the *Pita-2* gene

| Primer pair name/<br>Primer name | Forward primer sequences (5' to 3') | Reverse primer sequences (5' to 3') | Range covered by the amplicon          | Objective                                         |
|----------------------------------|-------------------------------------|-------------------------------------|----------------------------------------|---------------------------------------------------|
| AoL1135_AoL1136                  | GATTTGGTATGGGAGGAGCA                | TAAACCTGGCCCAAGACAAG                | Exon 1 (5'UTR) and Exon 2 (5'UTR)      | Acquisition of amplicon and cycle sequencing      |
| AoL1137_AoL1138                  | TTGCTTGCCCTCAGTAGACGA               | TGCTTCTTGAAAAGGGGAGA                | Exon 2 (5'UTR) and Exon 3 (5'UTR, CDS) | Acquisition of amplicon and cycle sequencing      |
| AoL1139_AoL1140                  | AACCGACTCCCTCTTGAAT                 | ATTTGTCGGCCACATCTTTC                | Exon 4 (CDS)                           | Acquisition of amplicon and cycle sequencing      |
| AoL1141_AoL1142                  | GTCCGCTGTTCTGCTCTAC                 | GCTCTGCCATACAGGACCAT                | Exon 4 (CDS)                           | Acquisition of amplicon and cycle sequencing      |
| AoL1143_AoL1144                  | GCAACTTACAGGCATGCAGA                | TGCTGCGAATGTAGAGTTG                 | Exon 4 (CDS)                           | Acquisition of amplicon and cycle sequencing      |
| AoL1145_AoL1179                  | TGCCACGATCATATTGAGGA                | AACGTGGGTGTATGTGCACA                | Exon 4 (CDS) and Exon 5 (CDS, 3'UTR)   | Acquisition of amplicon and cycle sequencing      |
| AoL1188                          | ATCTGGCAGGTGTAGATCTGG               |                                     | Exon 4 (CDS)                           | Cycle sequencing for the AoL1143_AoL1144 amplicon |
| AoL1196                          |                                     | GGAGTAGGGACTACACAGATG               | Exon 4 (CDS)                           | Cycle sequencing for the AoL1143_AoL1144 amplicon |
| AoL1352                          | CATCTGTGTAGTCCCTACTCC               |                                     | Exon 4 (CDS) and Exon 5 (CDS, 3'UTR)   | Cycle sequencing for the AoL1145_AoL1179 amplicon |
| AoL1170                          | TGCAGGTGCTAAGAGAAGCA                |                                     | Exon 5 (CDS, 3'UTR)                    | Cycle sequencing for the AoL1145_AoL1179 amplicon |
| AoL1195                          |                                     | TCAAGAGATACAACACGCGTTG              | Exon 4 (CDS) and Exon 5 (CDS, 3'UTR)   | Cycle sequencing for the AoL1145_AoL1179 amplicon |
| AoL1180                          |                                     | CTTCCTCGCCCAAAAACATA                | Exon 4 (CDS) and Exon 5 (CDS, 3'UTR)   | Cycle sequencing for the AoL1145_AoL1179 amplicon |

UTR, untranslated region; CDS, coding sequence.



Supplemental Table 4. SNP haplotypes at ten loci and their genotypes for blast resistance

|       |            | Chromosome number (Chr.) <sup>a</sup> |          |   |   |   |   | Haplotype |              | Haplotype ID | Genotype <sup>c</sup> | No. of varieties (%) | Representative varieties <sup>d</sup> |                       |            |                                                      |
|-------|------------|---------------------------------------|----------|---|---|---|---|-----------|--------------|--------------|-----------------------|----------------------|---------------------------------------|-----------------------|------------|------------------------------------------------------|
| Locus | Assay name | No. IRGSP-1.0                         | Chr. 1   |   |   |   |   |           | Standard set |              |                       |                      |                                       | Core set <sup>b</sup> |            |                                                      |
| Pit   | FA4467     | 1                                     | 2680046  | A | G | T | C | C         | C            | A            | AGTCCA                | T                    | Pit_H01                               | Pit                   | 6 (1.6)    | K59, Deng Pao Zhai, Asu                              |
|       | FA4453     | 2                                     | 2681202  | A | A | C | C | C         | C            | A            | AACCCA                | C                    | Pit_H02                               | -                     | 98 (26.6)  | Nipponbare, Momiroman, Hamasari                      |
|       | FA4455     | 3                                     | 2682651  | A | A | C | C | C         | C            | A            | AACCTT                | C                    | Pit_H03                               | -                     | 156 (42.3) | Koshihikari, Fukuhibiki, Leafstar                    |
|       | FA4461     | 4                                     | 2683065  | A | G | C | C | A         | A            | T            | AGCACT                | C                    | Pit_H04                               | -                     | 43 (11.7)  | Hokuriku 193, Takanari, Kusahonami                   |
|       |            |                                       |          |   | G | G | C | C         | C            | T            | GGCCCT                | C                    | Pit_H05                               | -                     | 29 (7.9)   | Sensho, Owarihatamochi, Iwaidawara                   |
|       |            |                                       |          |   | A | G | C | C         | C            | T            | AGCCCT                | C                    | Pit_H06                               | -                     | 8 (2.2)    | Hoshiyutaka, Tachijobu, Zenith                       |
|       |            |                                       |          |   | A | G | C | C         | C            | T            | AGC-CA                | C                    | Pit_H07                               | -                     | 29 (7.9)   | Kahei, IR 64, Kasalath                               |
|       |            |                                       |          |   | A | G | C | C         | C            | A            |                       |                      |                                       |                       |            |                                                      |
| Pish  | FA4649     | 1                                     | 32985740 | G | G | C | C | A         | A            | C            | GGCCACACGAC           | GCC                  | Pish_H01                              | Pish                  | 178 (48.2) | Nipponbare, Koshihikari, Fukuhibiki                  |
|       | FA4645     | 2                                     | 33074934 | T | G | C | C | A         | A            | C            | TGCCACACGGA           | TGA                  | Pish_H02                              | Pi35                  | 2 (0.5)    | Hokkai 188, Aokei IL2                                |
|       | FA4644     | 3                                     | 33075459 | G | A | T | C | T         | T            | C            | GATCTCACCAC           | GCC                  | Pish_H03                              | -                     | 47 (12.7)  | Kimmaze, Kusahonami, Kirara 397                      |
|       | FA4636     | 4                                     | 33080208 | G | A | C | C | T         | A            | C            | GACCTCACCAC           | GCC                  | Pish_H04                              | *                     | 41 (11.1)  | Sensho, Owarihatamochi, Kahei                        |
|       | FA4627     | 5                                     | 33101529 | G | G | C | C | A         | A            | C            | GGCCACACGGA           | GGA                  | Pish_H05                              | -                     | 15 (4.1)   | Yukihimehabutaemochi, Shintaishomochi, Shinshu       |
|       |            |                                       |          |   | T | G | C | T         | T            | T            | TGCTTTATCGC           | TCC                  | Pish_H06                              | -                     | 15 (4.1)   | Mochidawara, IR 24, Habataki                         |
|       |            |                                       |          |   | G | G | C | T         | A            | A            | GGCTACCTCGC           | GCC                  | Pish_H07                              | *                     | 9 (2.4)    | IR 64, Hokuriku 193, Takanari                        |
|       |            |                                       |          |   | G | G | C | T         | T            | T            | GGCTTCATCAC           | GCC                  | Pish_H08                              | *                     | 34 (9.2)   | Tadukan, Davao 1, Taporuri, Basilanon, Bei Khe, Naba |
|       |            |                                       |          |   | T | G | C | C         | T            | T            | TGCTCACC GC           | TCC                  | Pish_H09                              | *                     | 16 (4.3)   | Pusur, Tupa 121-3, Kasalath, Modan                   |
|       |            |                                       |          |   | G | G | C | T         | T            | T            | GGCTTTATCGC           | GCC                  | Pish_H10                              | -                     | 2 (0.5)    | Bekoaoba, Tainung 67                                 |
|       |            |                                       |          |   | G | G | C | C         | A            | A            | GGCCATATCAC           | GCC                  | Pish_H11                              | -                     | 5 (1.4)    | Badari Dhan, Kaluheenati, Local Basmati              |
|       |            |                                       |          |   | G | G | C | C         | T            | T            | GGCTCACCAC            | GCC                  | Pish_H12                              | -                     | 1 (0.3)    | Ouu 197                                              |
|       |            |                                       |          |   | G | G | C | C         | T            | T            | GGCTCACC GC           | GCC                  | Pish_H13                              | -                     | 1 (0.3)    | Anjana Dhan                                          |
|       |            |                                       |          |   | G | G | C | T         | A            | A            | GGCTACACGC            | GCC                  | Pish_H14                              | -                     | 1 (0.3)    | Padi Kuning                                          |
|       |            |                                       |          |   | T | G | C | C         | A            | A            | TGCCATATCAC           | TCC                  | Pish_H15                              | *                     | 1 (0.3)    | Bleiyo                                               |
|       |            |                                       |          |   | T | G | C | T         | A            | A            | TGCTACCTCGC           | TCC                  | Pish_H16                              | -                     | 1 (0.3)    | Neang Menh                                           |

(Continued)

| Locus      | Assay name | No. IRGSP-1.0 | Chr. 2 |   |   |   |   |   |   |   |   | Haplotype    |                       | Haplotype ID | Genotype <sup>c</sup> | No. of varieties (%) | Representative varieties <sup>d</sup> |                                                      |
|------------|------------|---------------|--------|---|---|---|---|---|---|---|---|--------------|-----------------------|--------------|-----------------------|----------------------|---------------------------------------|------------------------------------------------------|
|            |            |               |        |   |   |   |   |   |   |   |   | Standard set | Core set <sup>b</sup> |              |                       |                      |                                       |                                                      |
|            |            |               | 1      | 2 | 3 | 4 | 5 | 6 | 7 | 8 | 9 |              |                       |              |                       |                      |                                       |                                                      |
| <i>Pib</i> | FA4424     | 1             | C      | G | G | T | G | C | T | T | G | T            | CGGTGCTGT             | T            | Pib_H01               | <i>Pib</i>           | 39 (10.6)                             | BL 1, Fukuhibiki, Momiroman                          |
|            | FA4422     | 2             | C      | T | G | C | G | T | C | C | G | G            | CTGCGTCGG             | C            | Pib_H02               | -                    | 175 (47.4)                            | Nipponbare, Fujisaka 5, Hinohikari                   |
|            | FA4416     | 3             | T      | T | G | C | G | T | C | C | G | G            | TTGCGTCGG             | C            | Pib_H03               | -                    | 73 (19.8)                             | Koshihikari, Hamasari, Sensho                        |
|            | FA4408     | 4             | C      | G | G | C | T | C | T | T | A | G            | CGGCTCTAG             | C            | Pib_H04               | -                    | 18 (4.9)                              | Kusahonami, Leafstar, Hoshiyutaka                    |
|            | FA4407     | 5             | C      | G | T | C | T | C | T | T | G | T            | CGTCTCTGT             | C            | Pib_H05               | -                    | 15 (4.1)                              | Hokuriku 193, Guizhao 2, Nerica 1                    |
|            | FA4404     | 6             | C      | G | G | C | G | T | C | C | G | G            | CGGCGTCGG             | C            | Pib_H06               | - *                  | 8 (2.2)                               | Tadukan, Te-tep, <b>Muha</b> , <b>Basilanon</b>      |
|            | 35108842   |               | C      | G | G | C | G | T | C | C | A | G            | CGGCGTCAG             | C            | Pib_H07               | - *                  | 3 (0.8)                               | Nishiaoba, <b>Khao Nam Jen</b> , <b>Khau Mac Kho</b> |
|            | 35115834   |               | C      | G | G | C | G | T | T | T | G | T            | CGGCGTTGT             | C            | Pib_H08               | - *                  | 4 (1.1)                               | <b>Kasalath</b> , Akamai_Kanto, Akamai_Kochi         |
|            | 3511834    |               | C      | G | T | C | T | C | T | T | G | G            | CGTCTCTGG             | C            | Pib_H09               | - *                  | 3 (0.8)                               | <b>Toboshi</b> , <b>Davao 1</b> , Ryou Suisan Koumai |
|            | 35133756   |               | C      | G | G | C | G | T | C | T | G | G            | CGGCTCTGG             | C            | Pib_H10               | - *                  | 7 (1.9)                               | <b>Deng Pao Zhai</b> , <b>Naba</b> , Keiboba         |
|            | 35138569   |               | C      | G | G | C | G | T | C | T | G | G            | CGGCGTYGT             | C            | Pib_H11               | - *                  | 5 (1.4)                               | <b>Tupa 121-3</b> , Kaluheenati, Ratul               |
|            |            |               | C      | T | G | C | G | T | C | Y | G | T            | CTGCGTCGT             | C            | Pib_H12               | -                    | 3 (0.8)                               | ARC 5955, ARC 7098, Shoni                            |
|            |            |               | C      | G | G | C | G | T | C | T | G | T            | CGGCGTCGT             | C            | Pib_H13               | - *                  | 2 (0.5)                               | <b>Nona Bokra</b> , Puluik Arang                     |
|            |            |               | C      | G | G | C | G | T | C | T | A | G            | CGGCGCTGG             | C            | Pib_H14               | - *                  | 2 (0.5)                               | <b>Bei Khe</b> , Lebed                               |
|            |            |               | C      | G | G | C | G | T | C | Y | A | G            | CGGCGTYAG             | C            | Pib_H15               | - *                  | 2 (0.5)                               | <b>LAC 23</b> , Moroberekan                          |
|            |            |               | C      | G | G | C | T | C | T | T | G | T            | CGGCTCTGT             | C            | Pib_H16               | -                    | 2 (0.5)                               | ARC 7047, Kohokuto                                   |
|            |            |               | C      | G | G | C | G | T | C | T | G | G            | CGGCGTTGG             | C            | Pib_H17               | -                    | 1 (0.3)                               | Deejiaohualuo                                        |
|            |            |               | C      | G | G | C | G | T | C | T | A | G            | CGGCGTTAG             | C            | Pib_H18               | - *                  | 1 (0.3)                               | <b>Bleiyo</b>                                        |
|            |            |               | C      | G | G | C | T | C | C | A | A | G            | CGGCTCCAG             | C            | Pib_H19               | -                    | 1 (0.3)                               | Padi Kuning                                          |
|            |            |               | C      | G | G | C | G | T | Y | A | T |              | CGGCGTYAT             | C            | Pib_H20               | -                    | 1 (0.3)                               | Pusur                                                |
|            |            |               | C      | T | G | C | T | C | T | G | T |              | CTGCTCTGT             | C            | Pib_H21               | -                    | 1 (0.3)                               | Vandaran                                             |
|            |            |               | C      | G | G | C | T | C | C | A | T |              | CGGCTCCAT             | C            | Pib_H22               | -                    | 1 (0.3)                               | Asu                                                  |
|            |            |               | C      | G | T | C | T | C | T | A | G |              | CGTCTCTAG             | C            | Pib_H23               | -                    | 1 (0.3)                               | Bingala                                              |
|            |            |               | C      | G | G | C | T | C | T | A | T |              | CGGCTCTAT             | C            | Pib_H24               | -                    | 1 (0.3)                               | Jena 035                                             |

| Locus      | Assay name | No. IRGSP-1.0 | Chr. 6 |   |   |   |   |   |   |   |   |    |    |    | Haplotype     |                       | Haplotype ID | Genotype <sup>c</sup> | No. of varieties (%) | Representative varieties <sup>d</sup>                   |                                                          |
|------------|------------|---------------|--------|---|---|---|---|---|---|---|---|----|----|----|---------------|-----------------------|--------------|-----------------------|----------------------|---------------------------------------------------------|----------------------------------------------------------|
|            |            |               |        |   |   |   |   |   |   |   |   |    |    |    | Standard set  | Core set <sup>b</sup> |              |                       |                      |                                                         |                                                          |
|            |            |               | 1      | 2 | 3 | 4 | 5 | 6 | 7 | 8 | 9 | 10 | 11 | 12 |               |                       |              |                       |                      |                                                         |                                                          |
| <i>Piz</i> | FA5376     | 1             | G      | A | C | C | T | C | G | T | A | A  | C  | T  | GACCTCGTAACT  | CTCTG                 | Piz_H01      | <i>Piz</i>            | 13 (3.5)             | Fukunishiki, Zenith, <b>Hanaechizen</b>                 |                                                          |
|            | FA4676     | 2             | G      | G | C | C | G | T | G | T | A | A  | G  | T  | GGCCGTGAAGT   | CGTTG                 | Piz_H02      | <i>Piz-t</i> *        | 5 (1.4)              | <b>Toride 1</b> , IRBLz-t, Yumetoiro, <b>Nona Bokra</b> |                                                          |
|            | FA4678     | 3             | A      | G | C | C | G | C | G | T | A | A  | G  | T  | AGCCCGTAAAGT  | CGCTG                 | Piz_H03      | <i>Piz-5</i>          | 3 (0.8)              | IRBLz5-CA[LT], IRBLz5-TA[LT], IRBLz5-CA                 |                                                          |
|            | FA4679     | 4             | G      | A | C | T | T | C | G | T | A | A  | G  | T  | GACTTCGTAAGT  | TTCTG                 | Piz_H04      | <i>Piz9</i>           | 3 (0.8)              | IRBL9-W[LT], IRBL9-W[US], Koshihikari Kanto BL1         |                                                          |
|            | FA4680     | 5             | G      | G | G | C | T | C | G | T | G | T  | G  | T  | GGGCTCGTGTGT  | CTCTG                 | Piz_H05      | - *                   | 207 (56.1)           | Nipponbare, Koshihikari, Fukuhibiki, <b>Kasalath</b>    |                                                          |
|            | FA385269   | 6             | G      | A | C | C | T | C | G | T | A | A  | G  | A  | GACCTCGTAAGA  | CTCTG                 | Piz_H06      | -                     | 74 (20.1)            | Kusahonami, Momiroman, Asahinoyume                      |                                                          |
|            | FA389855   | 7             | G      | G | C | C | T | C | G | A | A | G  | T  |    | GGCCTCGAAAGT  | CTCAG                 | Piz_H07      | - *                   | 10 (2.7)             | Hokuriku 193, <b>Takanari</b> , IR 64                   |                                                          |
|            | FA421778   | 8             | G      | G | C | C | T | C | A | T | G | T  | G  | T  | GGCCTCATGTGT  | CTCTG                 | Piz_H08      | - *                   | 16 (4.3)             | Sencho, Owarihatamochi, <b>Naba</b>                     |                                                          |
|            | FA422671   | 9             | G      | G | C | C | T | C | G | T | A | A  | G  | T  | GGCCTCGTAAAGT | CTCTG                 | Piz_H09      | -                     | 19 (5.1)             | IR 24, Te-tep, Hokurikumochi 181                        |                                                          |
|            | FA422831   | 10            | G      | G | C | C | T | C | G | T | G | T  | G  | T  | GGCCTCGTGTGT  | CTCTG                 | Piz_H10      | -                     | 2 (0.5)              | K59, Kanto 51                                           |                                                          |
|            | FA426588   | 11            | G      | A | C | C | T | C | G | T | G | T  | G  | T  | GACCTCGTGTGT  | CTCTG                 | Piz_H11      | - *                   | 2 (0.5)              | <b>Khao Nam Jen</b> , <b>Khau Mac Kho</b>               |                                                          |
|            | FA427313   | 12            | G      | G | C | C | T | C | A | A | A | C  | T  |    | GGCCTCGAAACT  | CTCAC                 | Piz_H12      | -                     | 2 (0.5)              | IRBL5-M[US], IRBLk-K3[US]                               |                                                          |
|            | 10427757   |               | G      | G | C | C | T | C | G | T | A | T  | G  | T  | GGCCTCGTATGT  | CTCTG                 | Piz_H13      | - *                   | 3 (0.8)              | Bingala, <b>Bleiyo</b> , Ryou Suisan Koumai             |                                                          |
|            | 10471201   |               | G      | G | C | T | T | C | G | T | G | T  | A  | G  | T             | GGCTTCGTGTGT          | TTCTG        | Piz_H14               | <i>Piz9</i> *        | 3 (0.8)                                                 | <b>Pokkali</b> , <b>Rafhandam</b> , <b>Shwe Nang Gyi</b> |
|            |            |               | -      | G | C | - | - | C | G | - | - | -  | -  | -  | GACCTCGTAAAGT | CTCTG                 | Piz_H15      | -                     | 2 (0.5)              | Chin Galay, Rambhog                                     |                                                          |
|            |            |               | G      | G | C | C | T | T | G | T | G | T  | G  | T  | -GC--CG----   | CTCTG                 | Piz_H16      | -                     | 3 (0.8)              | Badari Dhan, Jhona 2, Local Basmati                     |                                                          |
|            |            |               | G      | G | C | C | T | T | G | T | G | T  | G  | T  | GGCCTGTGTGT   | CTTTG                 | Piz_H17      | <i>Piz-t?</i> *       | 1 (0.3)              | <b>Menaragala</b>                                       |                                                          |
|            |            |               | G      | A | C | C | T | T | G | - | - | T  | G  | T  | GACCTTG--TGT  | CTT-G                 | Piz_H18      | - *                   | 1 (0.3)              | <b>Bei Khe</b>                                          |                                                          |

(Continued)

|       |               | Chr. 6 |           |          |        |        |        |        |        |        |        | Haplotype |          |              |                       |                      |                                       |          |       |                                               |                                   |                                             |
|-------|---------------|--------|-----------|----------|--------|--------|--------|--------|--------|--------|--------|-----------|----------|--------------|-----------------------|----------------------|---------------------------------------|----------|-------|-----------------------------------------------|-----------------------------------|---------------------------------------------|
| Locus | Assay name    | No.    | IRGSP-1.0 |          |        |        |        |        |        |        |        |           |          | Haplotype ID | Genotype <sup>c</sup> | No. of varieties (%) | Representative varieties <sup>d</sup> |          |       |                                               |                                   |                                             |
|       |               |        |           | Chr. 6   |        |        |        |        |        |        |        |           |          |              |                       |                      |                                       |          |       |                                               |                                   |                                             |
|       |               |        |           | 11677578 |        |        |        |        |        |        |        |           |          |              |                       |                      |                                       |          |       |                                               |                                   |                                             |
|       |               |        |           | FA5269   | FA5270 | FA5271 | FA5280 | FA5294 | FA5283 | FA5288 | FA5292 | FA5293    | 19614430 | Standard set | Core set <sup>b</sup> |                      |                                       |          |       |                                               |                                   |                                             |
| Pi13  | Pi13 locus_US | 1      | 17096200  | G        | G      | G      | A      | G      | T      | G      | G      | G         | G        | GGGAGTGGG    | AATG                  | Pi13_H01             | Pi13                                  | 6        | (1.6) | Kasalath, Koshihikari Toyama BL7, Anjana Dhan |                                   |                                             |
|       |               |        |           | G        | G      | G      | A      | G      | C      | G      | G      | G         | G        | G            | GGGAGCGGA             | AGCG                 | Pi13_H02                              | -        | 76    | (20.6)                                        | Nipponbare, Koshihikari, Hamasari |                                             |
|       |               |        |           | G        | G      | G      | A      | G      | C      | G      | C      | G         | G        | G            | G                     | GGGAGCGGG            | AGCG                                  | Pi13_H03 | -     | 159                                           | (43.1)                            | Fukuhibiki, Kusahonami, Sensho, Sasanishiki |
|       |               |        |           | A        | G      | C      | A      | G      | C      | G      | C      | G         | G        | G            | G                     | AGCAGCGGG            | AGCG                                  | Pi13_H04 | -     | 22                                            | (6)                               | Ishikarishiroke, Yumepirika, Kitayukimochi  |
|       |               |        |           | A        | G      | G      | A      | G      | C      | G      | C      | G         | G        | G            | G                     | AGGAGCGGG            | AGCG                                  | Pi13_H05 | -     | 20                                            | (5.4)                             | Fujisaka 5, Hoshiaoba, Ochikara             |
|       |               |        |           | G        | G      | G      | A      | G      | C      | A      | T      | G         | G        | G            | G                     | GGGGGCATG            | GGCT                                  | Pi13_H06 | -     | 30                                            | (8.1)                             | Yumetoiro, IR 64, Guizhao 2                 |
|       |               |        |           | G        | G      | G      | A      | A      | T      | G      | G      | G         | G        | G            | G                     | GGGAATGGG            | AATG                                  | Pi13_H07 | -     | 27                                            | (7.3)                             | Hokuriku 193, Takanari, Mochidawara         |
|       |               |        |           | G        | A      | G      | A      | G      | C      | G      | C      | G         | G        | G            | G                     | GAGAGCGGG            | AGCG                                  | Pi13_H08 | -     | 9                                             | (2.4)                             | Momiroman, Mizuhochikara, Yamadawara        |
|       |               |        |           | G        | G      | G      | G      | G      | T      | A      | G      | G         | G        | G            | G                     | GGGGTGGG             | GGTG                                  | Pi13_H09 | -     | 6                                             | (1.6)                             | Mizuhatomochi, Kahei, Nerica 1              |
|       |               |        |           | G        | G      | G      | A      | A      | T      | G      | T      | G         | G        | G            | G                     | GGGAATAGG            | AATG                                  | Pi13_H10 | -     | 6                                             | (1.6)                             | Toride 1, IRBLzt-T, Bingala                 |
|       |               |        |           | G        | G      | G      | A      | G      | T      | G      | T      | G         | G        | G            | G                     | GGGAGTGTG            | AGTT                                  | Pi13_H11 | -     | 3                                             | (0.8)                             | ARC 5955, ARC 7047, Pusur                   |
|       |               |        |           | G        | G      | G      | A      | G      | C      | A      | T      | G         | G        | G            | G                     | GGGAGCATG            | AGCT                                  | Pi13_H12 | -     | 2                                             | (0.5)                             | Hong Cheuh Zai, Keiboba                     |
|       |               |        |           | G        | G      | G      | A      | A      | C      | G      | T      | G         | G        | G            | G                     | GGGAACGTG            | AACT                                  | Pi13_H13 | -     | 2                                             | (0.5)                             | Nepal 555, Shoni                            |
|       |               |        |           | G        | G      | G      | A      | A      | C      | G      | G      | G         | G        | G            | G                     | GGGAACGGG            | AACG                                  | Pi13_H14 | -     | 1                                             | (0.3)                             | Modan                                       |

  

|       |            | Chr. 9 |           |         |        |        |        |        |           |        |         | Haplotype |           |              |                       |                      |                                       |        |                                                                         |
|-------|------------|--------|-----------|---------|--------|--------|--------|--------|-----------|--------|---------|-----------|-----------|--------------|-----------------------|----------------------|---------------------------------------|--------|-------------------------------------------------------------------------|
| Locus | Assay name | No.    | IRGSP-1.0 |         |        |        |        |        |           |        |         |           |           | Haplotype ID | Genotype <sup>c</sup> | No. of varieties (%) | Representative varieties <sup>d</sup> |        |                                                                         |
|       |            |        |           | Chr. 9  |        |        |        |        |           |        |         |           |           |              |                       |                      |                                       |        |                                                                         |
|       |            |        |           | 9667216 |        |        |        |        |           |        |         |           |           |              |                       |                      |                                       |        |                                                                         |
|       |            |        |           | FA4515  | FA4505 | FA4494 | FA4495 | FA4501 | 9674617   | FA4526 | FA4527  | FA4533    | FA4536    | Standard set | Core set <sup>b</sup> |                      |                                       |        |                                                                         |
| Pii   | Pii CDS_US | 1      | 9657397   | G       | G      | G      | G      | T      | G         | A      | A       | T         | GGGGTGAAT | GGT          | Pii_H01-1             | Pii                  | 101                                   | (27.4) | Fujisaka 5, Ishikarishiroke, Hitomebore                                 |
|       |            |        |           | G       | G      | G      | G      | T      | G         | T      | T       | T         | GGGGTGTTT | GGT          | Pii_H01-2             | Pii                  | 4                                     | (1.1)  | Nerica 1, Hoshiyutaka, AC 540                                           |
|       |            |        |           | A       | G      | T      | G      | C      | G         | T      | T       | T         | AGTGCSTTT | GTC          | Pii_H02               | Pi5/Pi3              | 14                                    | (3.8)  | IRBL5-M[LT], IRBL5-M, IRBL3-CP4[LT], IRBL3-CP4, Hokuriku 193, Basilanon |
|       |            |        |           | G       | C      | G      | C      | C      | T         | T      | T       | G         | GCGCCTTTG | CGC          | Pii_H03               | -                    | 166                                   | (45)   | Nipponbare, Koshihikari, Fukuhibiki, Kusahonami                         |
|       |            |        |           | G       | C      | G      | C      | C      | G         | T      | A       | T         | GCGCCGTAT | CGC          | Pii_H04               | -                    | 44                                    | (11.9) | Takanari, Hokurikumochi 181, IR 64                                      |
|       |            |        |           | G       | C      | G      | C      | C      | G         | G      | T       | G         | GCGCCGTTG | CGC          | Pii_H05               | -                    | 6                                     | (1.6)  | Hokkai 188, Kitaake, Akage                                              |
|       |            |        |           | G       | C      | G      | C      | C      | G         | T      | T       | T         | GCGCCGTTT | CGC          | Pii_H06               | -                    | 4                                     | (1.1)  | Sensho, Owarihatamochi, Gaisen mochi                                    |
|       |            |        |           | G       | C      | G      | C      | C      | T         | T      | T       | T         | GCGCCTTTT | CGC          | Pii_H07               | -                    | 9                                     | (2.4)  | Moroberekan, Tadukan, Bleiyo, LAC23                                     |
|       |            |        |           | G       | C      | G      | G      | C      | G         | T      | A       | T         | GCGGCATAT | CGC          | Pii_H08               | -                    | 15                                    | (4.1)  | Modan, Pusur, Kasalath, Tupa 121-3                                      |
|       |            |        |           | G       | G      | G      | G      | C      | G         | T      | A       | -         | GCGGCATA- | CGC          | Pii_H09               | -                    | 3                                     | (0.8)  | Yumetoiro, Anjana Dhan, Lebed                                           |
|       |            |        |           | G       | G      | G      | G      | C      | G         | T      | A       | T         | GGGGCGTAT | GGC          | Pii_H10               | Pii                  | 2                                     | (0.5)  | Jinguoyin, Naba                                                         |
| G     | G          | G      | G         | T       | G      | A      | T      | G      | GGGGTGATG | GGT    | Pii_H11 | Pii       | 1         | (0.3)        | Khau Mac Kho          |                      |                                       |        |                                                                         |

(Continued)

| Locus | Assay name | No. IRGSP-1.0 | Chr. 11 |         |         |         |         |         |         |         | Haplotype    |                       | Haplotype ID | Genotype <sup>c</sup> | No. of varieties (%) | Representative varieties <sup>d</sup>          |                                       |                                                                                                               |
|-------|------------|---------------|---------|---------|---------|---------|---------|---------|---------|---------|--------------|-----------------------|--------------|-----------------------|----------------------|------------------------------------------------|---------------------------------------|---------------------------------------------------------------------------------------------------------------|
|       |            |               | 1       | 2       | 3       | 4       | 5       | 6       | 7       | 8       | Standard set | Core set <sup>b</sup> |              |                       |                      |                                                |                                       |                                                                                                               |
|       |            |               | 6521353 | 6540957 | 6542301 | 6543100 | 6544401 | 6561363 | 6634911 | 6638905 |              |                       |              |                       |                      |                                                | 6656541                               | 6707030                                                                                                       |
| Pia   | FA4608     | 1             | C       | G       | C       | C       | C       | C       | C       | A       | A            | G                     | Pia_H01-1    | Pia                   | 99 (26.8)            | Sasanishiki, Aichiasahi, Fukuhibiki, Momiroman |                                       |                                                                                                               |
|       | FA4605     | 2             | C       | G       | C       | C       | C       | C       | C       | C       | A            | A                     | C            | Pia_H01-2             | Pia                  | 22 (6)                                         | Bozu, Ochikara, Tachiaoba, Kitamizuho |                                                                                                               |
|       |            |               |         | G       | G       | G       | C       | C       | C       | C       | A            | A                     | G            | Pia_H02               | -                    | 4 (1.1)                                        | Nipponbare, Hanaechizen, Koganemasari |                                                                                                               |
|       |            |               |         | G       | G       | G       | C       | C       | C       | C       | A            | A                     | C            | Pia_H03               | -                    | 122 (33.1)                                     | Koshihikari, Kusahonami, Hoshiyutaka  |                                                                                                               |
|       |            |               |         | G       | T       | C       | C       | C       | C       | C       | A            | G                     | C            | C                     | Pia_H04              | Pia                                            | 30 (8.1)                              | Hokuriku 193, <a href="#">Takanari</a> , Mochidawara, <a href="#">Deng Pao Zhai</a> , <a href="#">Bei Khe</a> |
|       |            |               |         | G       | T       | C       | C       | C       | C       | C       | -            | -                     | C            | C                     | Pia_H05              | Pia                                            | 17 (4.6)                              | Te-tep, Tadukan, Zenith, <a href="#">Basilanon</a> , <a href="#">Qiu Zhao Zong</a>                            |
|       |            |               |         | G       | G       | G       | T       | C       | C       | C       | A            | A                     | -            | -                     | Pia_H06              | -                                              | 13 (3.5)                              | Sensho, Owarihatamochi, Yumenohatamochi                                                                       |
|       |            |               |         | G       | T       | C       | C       | C       | C       | C       | A            | A                     | C            | -                     | Pia_H07              | Pia                                            | 2 (0.5)                               | Guizhao 2, Taporuri                                                                                           |
|       |            |               |         | G       | G       | G       | C       | C       | C       | C       | A            | A                     | A            | -                     | Pia_H08              | -                                              | 17 (4.6)                              | <a href="#">Bleiyo</a> , <a href="#">Muha</a> , <a href="#">Tupa 121-3</a> , Kasalath                         |
|       |            |               |         | G       | G       | G       | C       | C       | C       | C       | A            | A                     | C            | -                     | Pia_H09              | -                                              | 7 (1.9)                               | Leafstar, <a href="#">Nona Bokra</a> , Saltstar                                                               |
|       |            |               |         | G       | G       | G       | T       | C       | C       | C       | A            | A                     | A            | C                     | Pia_H10              | -                                              | 2 (0.5)                               | <a href="#">Khao Nam Jen</a> , Reishiko                                                                       |
|       |            |               |         | C       | G       | G       | G       | C       | C       | C       | A            | A                     | A            | -                     | Pia_H11              | -                                              | 6 (1.6)                               | Milyang 42, IR 36, Pokkali                                                                                    |
|       |            |               |         | G       | G       | G       | T       | C       | C       | C       | A            | A                     | -            | C                     | Pia_H12              | -                                              | 6 (1.6)                               | IRBL19-A, IRBLkh-K3, IRBLks-B40[LT]                                                                           |
|       |            |               |         | -       | G       | G       | C       | C       | C       | C       | A            | A                     | A            | -                     | Pia_H13              | -                                              | 4 (1.1)                               | Asu, Co 13, Puluiik Arang                                                                                     |
|       |            |               |         | G       | G       | G       | C       | C       | C       | C       | -            | -                     | A            | -                     | Pia_H14              | -                                              | 4 (1.1)                               | Anjana Dhan, Hong Cheuh Zai, Keiboba                                                                          |
|       |            |               |         | G       | G       | G       | C       | C       | C       | C       | A            | A                     | -            | C                     | Pia_H15              | -                                              | 3 (0.8)                               | Badari Dhan, <a href="#">Khaui Mac Kho</a> , Nerica 1                                                         |
|       |            |               |         | G       | G       | G       | C       | C       | C       | C       | -            | -                     | A            | G                     | Pia_H16              | Pia                                            | 3 (0.8)                               | <a href="#">ARC 7098</a> , <a href="#">Pusur</a> , <a href="#">Shoni</a>                                      |
|       |            |               |         | G       | G       | G       | C       | C       | C       | C       | A            | -                     | -            | C                     | Pia_H17              | -                                              | 3 (0.8)                               | IRBL5-M[US], IRBL9-W[US], IRBLkh-K3[US]                                                                       |
|       |            |               |         | G       | G       | G       | C       | C       | C       | C       | A            | -                     | -            | C                     | Pia_H18              | Pia                                            | 2 (0.5)                               | <a href="#">IRBL5-M[LT]</a> , <a href="#">Jinguoyin</a>                                                       |
|       |            |               |         | G       | G       | G       | C       | C       | C       | C       | A            | A                     | C            | C                     | Pia_H19              | -                                              | 1 (0.3)                               | AC 540                                                                                                        |
|       |            |               |         | G       | G       | G       | C       | C       | C       | C       | -            | A                     | C            | G                     | Pia_H20              | Pia                                            | 1 (0.3)                               | <a href="#">Modan</a>                                                                                         |
|       |            |               | G       | G       | G       | C       | C       | C       | C       | -       | -            | A                     | S            | Pia_H21               | Pia                  | 1 (0.3)                                        | <a href="#">Naba</a>                  |                                                                                                               |

(Continued)

| Locus | Assay name | No. IRGSP-1.0 | Chr. 11 |   |   |   |   |   |   |   |   |    |    |    |    |    | Haplotype ID | Genotype <sup>c</sup> | No. of varieties (%) | Representative varieties <sup>d</sup> |    |                      |                      |                      |                      |                      |                                |                                            |                                                                |                                             |                                                  |
|-------|------------|---------------|---------|---|---|---|---|---|---|---|---|----|----|----|----|----|--------------|-----------------------|----------------------|---------------------------------------|----|----------------------|----------------------|----------------------|----------------------|----------------------|--------------------------------|--------------------------------------------|----------------------------------------------------------------|---------------------------------------------|--------------------------------------------------|
|       |            |               | 1       | 2 | 3 | 4 | 5 | 6 | 7 | 8 | 9 | 10 | 11 | 12 | 13 | 14 |              |                       |                      |                                       | 15 | 16                   | 17                   | 18                   | 19                   | 20                   |                                |                                            |                                                                |                                             |                                                  |
| Pik   | FA4742     | 1 27817940    | A       | G | T | C | G | C | - | - | - | -  | -  | -  | -  | T  | C            | G                     | G                    | A                                     | G  | AGTCGCCACGTAATTCGGAG | GGCCACTAATT          | Pik_H01-1            | Pik                  | 12 (3.3)             | Kusabue, Hamaasahi, Kirara 397 |                                            |                                                                |                                             |                                                  |
|       | FA4740     | 2 27818557    | A       | G | T | C | G | C | G | A | C | G  | T  | A  | A  | T  | T            | C                     | G                    | G                                     | A  | G                    | AGTCGCGACGTAATTCGGAG | GGCCACTAATT          | Pik_H01-2            | Pik                  | 4 (1.1)                        | Kanto 51, Iwaidawara, Yukigesho            |                                                                |                                             |                                                  |
|       | FA4737     | 3 27820870    | G       | C | C | G | C | C | C | C | C | G  | T  | A  | A  | C  | T            | C                     | G                    | G                                     | T  | G                    | GCCCGCCGTAACCTCGGT   | CGCCCGTAACT          | Pik_H02              | Pik-m                | 13 (3.5)                       | Tsuyake, Hinohikari Kanto BL2, Himenomochi |                                                                |                                             |                                                  |
|       | FA4735     | 4 27823073    | G       | C | C | G | C | C | C | C | A | -  | C  | T  | A  | C  | T            | C                     | G                    | G                                     | A  | T                    | GCCCGCCA-CCTACTCGGAT | CGCCA-CTACT          | Pik_H03              | Pik-p                | 5 (1.4)                        | K60, IRBLkp-K60, Pusur                     |                                                                |                                             |                                                  |
|       | FA4734     | 5 27823722    | A       | G | C | C | G | C | C | C | C | A  | -  | C  | T  | A  | A            | T                     | C                    | G                                     | G  | A                    | G                    | AGCCGCCA-CTAATTCGGAG | GGCCA-TAATT          | Pik_H04-1            | Pik-s                          | 127 (34.4)                                 | Shin2, Koshihikari, Hokuriku 193                               |                                             |                                                  |
|       | FA4732     | 6 27828066    | G       | C | C | G | C | C | C | C | C | A  | -  | C  | T  | A  | A            | T                     | T                    | C                                     | G  | A                    | G                    | AGCCGCCA-CTAATTCGGAG | GGCCA-TAATT          | Pik_H04-2            | Pik-l                          | 12 (3.3)                                   | IRBLks-B40[LT], Qiu Zhao Zong, IRBLta-CP1, Lijiangxintuanheigu |                                             |                                                  |
|       | 27978523   | 7 no hit      | G       | C | C | G | C | C | C | C | C | A  | -  | C  | T  | A  | A            | T                     | T                    | C                                     | G  | A                    | T                    | GGCCACCA-CCTACTCAGAT | GACCA-TTACT          | Pik_H04-3            | New gene                       | 11 (3)                                     | IRBLks-Zh[LT], Mochidawara, IR 64, Yumetoiro                   |                                             |                                                  |
|       | FA4710     | 8 no hit      | G       | C | C | G | C | C | C | C | C | A  | -  | C  | T  | A  | A            | T                     | T                    | C                                     | G  | A                    | T                    | GGCCGACA-CCTACTCGGAT | GGACA-CTACT          | Pik_H05              | Pik-h                          | 3 (0.8)                                    | IRBLkh-K3, IRBLkh-K3[LT], IRBLkh-K3[US]                        |                                             |                                                  |
|       | FA4712     | 9 no hit      | G       | C | C | G | C | C | C | C | C | A  | -  | C  | T  | A  | A            | T                     | T                    | C                                     | G  | A                    | T                    | GGCCGACA-CCTACTCGGAT | GGACA-CTACT          | Pik_H06              | Pi7                            | 4 (1.1)                                    | IRBL7-M[LT], ARC 5955, Rambhog                                 |                                             |                                                  |
|       | FA5375     | 10 no hit     | G       | C | C | G | C | C | C | C | C | C  | A  | -  | C  | T  | A            | A                     | T                    | T                                     | C  | G                    | A                    | T                    | GCCCGCCA-CCTACTCGGAT | CGACA-CTACT          | Pik_H07                        | Pi1                                        | 2 (0.5)                                                        | IRBL1-CL[LT], Te-tep                        |                                                  |
|       | FA4717     | 11 no hit     | G       | C | C | G | C | C | C | C | C | C  | A  | -  | C  | T  | A            | A                     | T                    | T                                     | C  | G                    | A                    | T                    | GCCCGCCCCTAATTCGGGT  | GGCCCTATCT           | Pik_H07                        | Pi1                                        | 2 (0.5)                                                        | IRBL1-CL[LT], Te-tep                        |                                                  |
|       | FA4718     | 12 no hit     | G       | C | C | G | C | C | C | C | C | C  | A  | -  | C  | T  | A            | A                     | T                    | T                                     | C  | G                    | A                    | T                    | GCCCGCCCCTAATTCGGGT  | GGCCCTATCT           | Pik_H07                        | Pi1                                        | 2 (0.5)                                                        | IRBL1-CL[LT], Te-tep                        |                                                  |
|       | FA4721     | 13 no hit     | G       | C | C | G | C | C | C | C | C | C  | A  | -  | C  | T  | A            | A                     | T                    | T                                     | C  | G                    | A                    | T                    | GCCCGCCCCTAATTCGGGT  | GGCCCTATCT           | Pik_H07                        | Pi1                                        | 2 (0.5)                                                        | IRBL1-CL[LT], Te-tep                        |                                                  |
|       | FA4723     | 14 no hit     | G       | C | C | G | C | C | C | C | C | C  | A  | -  | C  | T  | A            | A                     | T                    | T                                     | C  | G                    | A                    | T                    | GCCCGCCCCTAATTCGGGT  | GGCCCTATCT           | Pik_H07                        | Pi1                                        | 2 (0.5)                                                        | IRBL1-CL[LT], Te-tep                        |                                                  |
|       | FA4726     | 14 no hit     | G       | C | C | G | C | C | C | C | C | C  | A  | -  | C  | T  | A            | A                     | T                    | T                                     | C  | G                    | A                    | T                    | GCCCGCCCCTAATTCGGGT  | GGCCCTATCT           | Pik_H07                        | Pi1                                        | 2 (0.5)                                                        | IRBL1-CL[LT], Te-tep                        |                                                  |
|       | 27988874   | 15 27992151   | G       | C | C | G | C | C | C | C | C | C  | A  | -  | C  | T  | A            | A                     | T                    | T                                     | C  | G                    | A                    | T                    | GCCCGCCCCTAATTCGGGT  | GGCCCTATCT           | Pik_H07                        | Pi1                                        | 2 (0.5)                                                        | IRBL1-CL[LT], Te-tep                        |                                                  |
|       | FA4729     | 16 27993468   | G       | C | C | G | C | C | C | C | C | C  | A  | -  | C  | T  | A            | A                     | T                    | T                                     | C  | G                    | A                    | T                    | GCCCGCCCCTAATTCGGGT  | GGCCCTATCT           | Pik_H07                        | Pi1                                        | 2 (0.5)                                                        | IRBL1-CL[LT], Te-tep                        |                                                  |
|       | FA4750     | 17 27995372   | G       | C | C | G | C | C | C | C | C | C  | A  | -  | C  | T  | A            | A                     | T                    | T                                     | C  | G                    | A                    | T                    | GCCCGCCCCTAATTCGGGT  | GGCCCTATCT           | Pik_H07                        | Pi1                                        | 2 (0.5)                                                        | IRBL1-CL[LT], Te-tep                        |                                                  |
|       | FA4751     | 18 27995713   | G       | C | C | G | C | C | C | C | C | C  | A  | -  | C  | T  | A            | A                     | T                    | T                                     | C  | G                    | A                    | T                    | GCCCGCCCCTAATTCGGGT  | GGCCCTATCT           | Pik_H07                        | Pi1                                        | 2 (0.5)                                                        | IRBL1-CL[LT], Te-tep                        |                                                  |
|       | FA4752     | 19 27996426   | G       | C | C | G | C | C | C | C | C | C  | A  | -  | C  | T  | A            | A                     | T                    | T                                     | C  | G                    | A                    | T                    | GCCCGCCCCTAATTCGGGT  | GGCCCTATCT           | Pik_H07                        | Pi1                                        | 2 (0.5)                                                        | IRBL1-CL[LT], Te-tep                        |                                                  |
|       | FA4753     | 20 28006310   | G       | C | C | G | C | C | C | C | C | C  | A  | -  | C  | T  | A            | A                     | T                    | T                                     | C  | G                    | A                    | T                    | GCCCGCCCCTAATTCGGGT  | GGCCCTATCT           | Pik_H07                        | Pi1                                        | 2 (0.5)                                                        | IRBL1-CL[LT], Te-tep                        |                                                  |
|       |            |               |         | A | G | T | C | G | C | C | C | C  | A  | -  | C  | T  | A            | A                     | T                    | T                                     | C  | G                    | A                    | T                    | AGTCGCCACGTAATTCGGAG | GGCCACTAATT          | Pik_H08                        | -                                          | 73 (19.8)                                                      | Nipponbare, Moroberekan, Sensho             |                                                  |
|       |            |               |         | A | G | T | C | G | C | C | C | C  | C  | A  | -  | C  | T            | A                     | A                    | T                                     | T  | C                    | G                    | A                    | T                    | AGTCGCCACGTAATTCGGAG | GGCCACTAATT                    | Pik_H09                                    | -                                                              | 15 (4.1)                                    | Tomoemasari, Kitaaoba, Hoshimaru                 |
|       |            |               |         | G | C | C | G | C | C | C | C | C  | C  | A  | -  | C  | T            | A                     | A                    | T                                     | T  | C                    | G                    | A                    | T                    | GCCCGCCCCTAATTCGGGT  | GGCCCTATCT                     | Pik_H10                                    | Pik-s                                                          | 13 (3.5)                                    | Momiroman, Tachisugata, Yamadawara               |
|       |            |               |         | G | C | C | G | C | C | C | C | C  | C  | A  | -  | C  | T            | A                     | A                    | T                                     | T  | C                    | G                    | A                    | T                    | GCCCGCCCCTAATTCGGGT  | GGCCCTATCT                     | Pik_H11                                    | Pik-s                                                          | 9 (2.4)                                     | Takanari, IR 24, Davao 1                         |
|       |            |               |         | G | C | C | G | C | C | C | C | C  | C  | A  | -  | C  | T            | A                     | A                    | T                                     | T  | C                    | G                    | A                    | T                    | GCCCGCCCCTAATTCGGGT  | GGCCCTATCT                     | Pik_H12                                    | New gene                                                       | 6 (1.6)                                     | Kusahonami, Hoshiyutaka, Akenohoshi, Modan       |
|       |            |               |         | G | C | C | G | C | C | C | C | C  | C  | A  | -  | C  | T            | A                     | A                    | T                                     | T  | C                    | G                    | A                    | T                    | GGCCGACA-CCTACTCAGAT | GACCA-TTACT                    | Pik_H13                                    | -                                                              | 2 (0.5)                                     | Kusanohoshi, Tachisuzuka                         |
|       |            |               |         | G | C | C | G | C | C | C | C | C  | C  | A  | -  | C  | T            | A                     | A                    | T                                     | T  | C                    | G                    | A                    | T                    | GGCCGACA-CCTACTCAGAT | GACCA-TTACT                    | Pik_H14                                    | -                                                              | 16 (4.3)                                    | Hamasari, Leafstar, Tadukan, Basilanon, Kasalath |
|       |            |               |         | G | C | C | G | C | C | C | C | C  | C  | A  | -  | C  | T            | A                     | A                    | T                                     | T  | C                    | G                    | A                    | T                    | GGCCGACA-CCTACTCAGAT | GACCA-TTACT                    | Pik_H15                                    | -                                                              | 5 (1.4)                                     | Deng Pao Zhai, Toboshi, IRBL5-M[US]              |
|       |            |               | G       | C | C | G | C | C | C | C | C | C  | A  | -  | C  | T  | A            | A                     | T                    | T                                     | C  | G                    | A                    | T                    | GGCCGACA-CCTACTCAGAT | GACCA-TTACT          | Pik_H16                        | -                                          | 13 (3.5)                                                       | Milyang 42, Taporuri, IRBL3-CP4, IRBLta-CT2 |                                                  |
|       |            |               | A       | G | C | C | G | C | C | C | C | C  | A  | -  | C  | T  | A            | A                     | T                    | T                                     | C  | G                    | A                    | T                    | GGCCGACA-CCTACTCAGAT | GACCA-TTACT          | Pik_H17                        | -                                          | 6 (1.6)                                                        | Muha, Tupa 121-3, Anjana Dhan               |                                                  |
|       |            |               | G       | C | C | G | C | C | C | C | C | C  | A  | -  | C  | T  | A            | A                     | T                    | T                                     | C  | G                    | A                    | T                    | AGCCGCCA-CCTACTCAGAT | GACCA-TTACT          | Pik_H18                        | Pik-s                                      | 3 (0.8)                                                        | Deejaohualuo, Hong Cheuh Zai, Keiboba       |                                                  |
|       |            |               | G       | C | C | G | C | C | C | C | C | C  | A  | -  | C  | T  | A            | A                     | T                    | T                                     | C  | G                    | A                    | T                    | GGCCGACA-CCTACTCAGAT | GACCA-TTACT          | Pik_H19                        | -                                          | 3 (0.8)                                                        | Neang Menh, Tupa729, Zenith                 |                                                  |
|       |            |               | -       | - | - | - | - | - | - | - | - | -  | -  | -  | -  | -  | -            | -                     | -                    | -                                     | -  | -                    | -                    | GGCCGACA-CCTACTCAGAT | GACCA-TTACT          | Pik_H20              | -                              | 2 (0.5)                                    | Puluik Arang, Ratul                                            |                                             |                                                  |
|       |            |               | G       | C | C | G | C | C | C | C | C | C  | A  | -  | C  | T  | A            | A                     | T                    | T                                     | C  | G                    | A                    | T                    | GCCCGCCCCTAATTCGGGT  | GGCCCTATCT           | Pik_H21                        | -                                          | 1 (0.3)                                                        | Padi Kuning                                 |                                                  |
|       |            |               | G       | C | C | G | C | C | C | C | C | C  | A  | -  | C  | T  | A            | A                     | T                    | T                                     | C  | G                    | A                    | T                    | GGCCGACA-CCTACTCAGAT | GACCA-TTACT          | Pik_H22                        | Pik-s                                      | 1 (0.3)                                                        | Kaluheinati                                 |                                                  |
|       |            |               | G       | - | C | G | C | C | C | C | C | C  | A  | -  | C  | T  | A            | A                     | T                    | T                                     | C  | G                    | A                    | T                    | G-CCGCCA-CCTACTCGGAT | -GCCA-TTACT          | Pik_H23                        | Pik-s                                      | 1 (0.3)                                                        | Guizhao 2                                   |                                                  |
|       |            |               | G       | C | C | G | C | C | C | C | C | C  | A  | -  | C  | T  | A            | A                     | T                    | T                                     | C  | G                    | A                    | T                    | GCCACCA-CCTACTCAGAT  | CACCA-TTACT          | Pik_H24                        | Pik-s                                      | 1 (0.3)                                                        | Naba                                        |                                                  |
|       |            |               | A       | G | C | C | G | C | C | C | C | C  | A  | -  | C  | T  | A            | A                     | T                    | T                                     | C  | G                    | A                    | T                    | AGCCGC-----CCAGAT    | GGC-----C            | Pik_H25                        | -                                          | 1 (0.3)                                                        | Mairangphoe                                 |                                                  |
|       |            |               | A       | G | C | C | G | C | C | C | C | C  | A  | -  | C  | T  | A            | A                     | T                    | T                                     | C  | G                    | A                    | T                    | AGCCGA-----ACCCAGAT  | GGA-----ACC          | Pik_H26                        | -                                          | 2 (0.5)                                                        | Urasan 1, Kahei                             |                                                  |
|       |            |               | G       | C | C | G | C | C | C | C | C | C  | A  | -  | C  | T  | A            | A                     | T                    | T                                     | C  | G                    | A                    | T                    | GCCCGC-----ACCCAGAT  | CGC-----ACC          | Pik_H27                        | -                                          | 1 (0.3)                                                        | Calotoc                                     |                                                  |
|       |            |               | G       | C | C | T | G | C | C | C | C | C  | A  | -  | C  | T  | A            | A                     | T                    | T                                     | C  | G                    | A                    | T                    | GGCTGC-----CCAGAT    | GGC-----C            | Pik_H28                        | -                                          | 1 (0.3)                                                        | Jhona 2                                     |                                                  |
|       |            |               | G       | C | C | G | C | C | C | C | C | C  | A  | -  | C  | T  | A            | A                     | T                    | T                                     | C  | G                    | A                    | T                    | GCCCGC-----CCAGAT    | GGC-----C            | Pik_H29                        | -                                          | 1 (0.3)                                                        | Tsuyaotome                                  |                                                  |

(Continued)

| Locus       | Assay name | No. IRGSP-1.0 | Chr. 12     |   |   |             |        |        | Haplotype    |                       | Haplotype ID  | Genotype <sup>c</sup>                            | No. of varieties (%)                                                                                     | Representative varieties <sup>d</sup> |
|-------------|------------|---------------|-------------|---|---|-------------|--------|--------|--------------|-----------------------|---------------|--------------------------------------------------|----------------------------------------------------------------------------------------------------------|---------------------------------------|
|             |            |               | Pita_CDS_US |   |   | Pita_CDS_DS |        |        | Standard set | Core set <sup>b</sup> |               |                                                  |                                                                                                          |                                       |
|             |            |               | 1           | 2 | 3 | 4           | 5      | 6      |              |                       |               |                                                  |                                                                                                          |                                       |
| <i>Pita</i> | FA4541     | 10607519      | C           | T | A | C           | C      | CTACCG | CC           | Pita_H01              | <i>Pita</i> * | 34 (9.2)                                         | <b>Yashiromochi</b> , <b>IRBLta-CP1</b> , PiNo.4, Ikuhikari, <b>Deng Pao Zhai</b> , <b>Qiu Zhao Zong</b> |                                       |
|             | FA4544     | 10611244      | A           | T | C | G           | C      | ATCGCG | AG           | Pita_H02              | <i>Pi20</i> * | 28 (7.6)                                         | <b>IR 24</b> , Hokuriku 193, Takanari, <b>Bleiyo</b>                                                     |                                       |
|             | FA4546     | 10611754      | A           | A | C | C           | AACCTG | AC     | Pita_H03     | - *                   | 110 (29.8)    | Nipponbare, Hamasari, Akidawara, <b>IRBL19-A</b> |                                                                                                          |                                       |
|             |            |               | A           | A | C | C           | AACCTA | AC     | Pita_H04     | -                     | 60 (16.3)     | Koshihikari, Leafstar, Tachiharuka               |                                                                                                          |                                       |
|             |            |               | A           | A | C | C           | AACCCG | AC     | Pita_H05     | -                     | 95 (25.7)     | Fukuhibiki, Sensho, Tachiaoba                    |                                                                                                          |                                       |
|             |            |               | A           | T | C | C           | ATCCCG | AC     | Pita_H06     | - *                   | 19 (5.1)      | Yatanomochi, <b>Naba</b> , Khau Mac Kho          |                                                                                                          |                                       |
|             |            |               | A           | T | C | C           | ATACCG | AC     | Pita_H07     | - *                   | 19 (5.1)      | Kasalath, Muha, <b>Tupa 121-3</b>                |                                                                                                          |                                       |
|             |            |               | A           | T | C | C           | ATC-CG | A-     | Pita_H08     | -                     | 3 (0.8)       | Kaluheenati, Mal Marso, Pokkali                  |                                                                                                          |                                       |
|             |            |               | A           | T | C | C           | A-CCCG | AC     | Pita_H09     | -                     | 1 (0.3)       | Asu                                              |                                                                                                          |                                       |

| Locus         | Assay name | No. IRGSP-1.0 | Chr. 12       |   |   |               |   |            | Haplotype    |                       | Haplotype ID  | Genotype <sup>c</sup> | No. of varieties (%)                                                                        | Representative varieties <sup>d</sup> |
|---------------|------------|---------------|---------------|---|---|---------------|---|------------|--------------|-----------------------|---------------|-----------------------|---------------------------------------------------------------------------------------------|---------------------------------------|
|               |            |               | Pita-2_CDS_US |   |   | Pita-2_CDS_DS |   |            | Standard set | Core set <sup>b</sup> |               |                       |                                                                                             |                                       |
|               |            |               | 1             | 2 | 3 | 4             | 5 | 6          |              |                       |               |                       |                                                                                             |                                       |
| <i>Pita-2</i> | FA4580     | 10801324      | G             | G | T | [B]           | C | GGT [B] CA | GT [B] C     | Pita-2_H01            | <i>Pita-2</i> | 12 (3.3)              | <b>PiNo.4</b> , <b>Ikuhikari</b> , Tadukan, Rei hou, Te-tep                                 |                                       |
|               | FA4571     | 10824087      | A             | G | T | [A]           | G | AGT [A] GG | GT [A] G     | Pita-2_H02            | <i>Pi19</i>   | 249 (67.5)            | <b>Nipponbare</b> , <b>Koshihikari</b> , Leafstar, Fukuhibiki                               |                                       |
|               | FA4572     | 10830872      | G             | G | T | [A]           | C | GGT [A] CA | GT [A] C     | Pita-2_H03            | - *           | 24 (6.5)              | Yashiromochi, IRBLta-CP1, IRBLta-CT2, <b>Deng Pao Zhai</b> , <b>Qiu Zhao Zong</b>           |                                       |
|               | FA5655     | 10833033      | G             | A | C | -             | G | GAC-GA     | AC-G         | Pita-2_H04            | <i>Pi20</i> * | 36 (9.8)              | <b>IR 24</b> , Hokuriku 193, Takanari, Kusahonami, <b>Bleiyo</b> , <b>Muha</b>              |                                       |
|               |            | 10833370      | -             | A | T | -             | G | -AT-GA     | AT-G         | Pita-2_H05            | - *           | 26 (7)                | Akage, <b>Khau Mac Kho</b> , Kitayukimochi                                                  |                                       |
|               |            | 10833494      | G             | G | T | [A]           | G | GGT [A] GA | GT [A] G     | Pita-2_H06            | <i>Pi19</i> * | 7 (1.9)               | Yatanomochi, <b>Naba</b> , <b>Khao Nam Jen</b> , <b>Bei Khe</b>                             |                                       |
|               |            | 10849598      | G             | G | T | [A]           | G | GGT [A] GG | GT [A] G     | Pita-2_H07            | <i>Pi19</i> * | 14 (3.8)              | <b>AC 540</b> , <b>Anjana Dhan</b> , <b>Deejaohualuo</b> , <b>Kaluheenat</b> , <b>Shoni</b> |                                       |
|               |            | 10853113      | A             | A | T | -             | G | AAT-GA     | AT-G         | Pita-2_H08            | -             | 1 (0.3)               | Khau Tan Chiem                                                                              |                                       |

Positions of end of the coding sequence (CDS) of respective resistance locus are indicated in white on black background. US, Upstream; DS, Downstream.

<sup>a</sup> At the FA5655 marker locus, the allele-type [A] indicates "AAAAACCAG" and [B] indicates "TG".

<sup>b</sup> The core set was chosen from the standard set to distinguish between resistant alleles and others; red letters indicate the core set.

<sup>c</sup> Genotypes for blast resistance; minus signs indicate absence of resistance alleles. Genotypes followed by an asterisk were validated by using varieties indicated in red in the column on the right, or chromosomal substitution lines containing the allele from donors indicated in blue.

<sup>d</sup> Variety names in bold represent the donors of respective resistance alleles.

**Supplemental Table 5.** Reactions of differential varieties harboring *Pik* alleles to 19 different races of blast isolates

| Differential lines  | SNP haplotype | Resistance alleles    | Origin | Code <sup>b</sup> | Isolate name   |                 |                  |                 |         |                  |               |       |                |                 |                 |               |          |            |               |                 |         |         |        |         |
|---------------------|---------------|-----------------------|--------|-------------------|----------------|-----------------|------------------|-----------------|---------|------------------|---------------|-------|----------------|-----------------|-----------------|---------------|----------|------------|---------------|-----------------|---------|---------|--------|---------|
|                     |               |                       |        |                   |                | Japan (Niigata) | Japan (Hokkaido) | Japan (Ibaraki) | Lao PDR | Japan (Kumamoto) | Japan (Aichi) | Kenya | Japan (Mutant) | Japan (Ibaraki) | Japan (Ibaraki) | Japan (Kochi) | Malaysia | Bangladesh | Japan (Fukui) | Japan (Ibaraki) | Vietnam | Vietnam | Uganda | Lao PDR |
| IRBLks-F5           | Pik_H04-1     | <i>Pik-s</i>          | S      | k177              | 1804-4         | S               | S                | S               | S       | S                | S             | S     | S              | S               | S               | R             | R        | R          | R             | R               | R       | R       | R      | R       |
| IRBLk-Ka            | Pik_H01-2     | <i>Pik</i>            | S      | k147              | H09-187-1      | S               | S                | S               | S       | S                | R             | R     | S              | S               | R               | R             | R        | S          | S             | S               | S       | R       | R      |         |
| IRBLk-Ku            | Pik_H01-1     | <i>Pik</i>            | S      | k137              | H05-72-1       | S               | S                | S               | S       | R                | R             | R     | S              | S               | R               | R             | R        | S          | S             | R               | R       | R       | R      | R       |
| IRBLkm-Ts           | Pik_H02       | <i>Pik-m</i>          | S      | k107              | H08-174-1      | R               | R                | R               | R       | R                | R             | R     | R              | R               | R               | S             | R        | R          | R             | R               | R       | R       | R      | R       |
| IRBL1-CL            | Pik_H07       | <i>Pi1</i>            | S      | k107              | Kyu92-22       | R               | R                | R               | R       | R                | R             | R     | R              | R               | R               | R             | R        | R          | R             | R               | R       | R       | R      | R       |
| IRBL1-CL[LT]        | Pik_H07       | <i>Pi1</i>            | S      | k107              | Ina168_Hokudai | R               | R                | R               | R       | R                | R             | R     | R              | R               | R               | R             | R        | R          | R             | R               | R       | R       | R      | R       |
| IRBLkp-K60-19F      | Pik_H03       | <i>Pik-p</i>          | S      | k106              | H13-098-1      | S               | S                | S               | S       | S                | S             | R     | R              | R               | S               | S             | S        | S          | S             | S               | S       | S       | R      |         |
| IRBL7-M             | Pik_H06       | <i>Pi7</i>            | S      | k106              | P-2b           | S               | S                | S               | S       | S                | S             | R     | R              | R               | S               | S             | S        | S          | S             | S               | S       | S       | R      |         |
| IRBLkh-K3           | Pik_H05       | <i>Pik-h</i>          | S      | k106              | H09-225-1      | S               | S                | R               | R       | R                | R             | R     | R              | R               | R               | S             | S        | R          | R             | R               | R       | R       | R      | R       |
| IRBLk*-F66[LT]      | Pik_H12       | <sup>a</sup> New gene | S      | k100              | H05-99-1       | S               | S                | R               | S       | R                | R             | R     | R              | R               | S               | S             | S        | S          | R             | R               | R       | R       | R      | R       |
| IRBLk*-F25[LT]      | Pik_H12       | <sup>a</sup> New gene | S      | k056              | Kyu9439013     | S               | S                | R               | S       | R                | R             | R     | R              | R               | S               | S             | S        | S          | S             | S               | S       | S       | R      | R       |
| IRBLk*-F14[LT]      | Pik_H12       | <sup>a</sup> New gene | S      | k046              | MA79-6-1       | S               | S                | R               | S       | R                | R             | R     | R              | R               | S               | S             | S        | S          | R             | R               | R       | R       | R      | R       |
| IRBLk-Ka[LT]        | Pik_H12       | <sup>a</sup> New gene | S      | k007              | H11-223-1      | S               | S                | R               | S       | R                | R             | R     | R              | R               | S               | S             | S        | S          | R             | R               | R       | R       | R      | R       |
| IRBLks-Zh[LT]       | Pik_H04-3     | <sup>a</sup> New gene | S      | k007              | H10-163-1      | S               | S                | S               | S       | S                | S             | S     | S              | S               | S               | R             | S        | S          | S             | S               | S       | S       | S      | R       |
| Lijiangxintuanheigu | Pik_H04-2     | <i>Pik-l</i>          | S      | k007              | H09-219-1      | S               | S                | S               | S       | S                | S             | S     | S              | S               | S               | R             | S        | S          | S             | R               | R       | S       | S      | S       |
| IRBLks-S[LT]        | Pik_H04-2     |                       | S      | k007              | H10-044-1      | S               | S                | S               | S       | S                | S             | R     | S              | S               | R               | R             | S        | S          | S             | R               | R       | S       | R      | R       |
| IRBLks-B40[LT]      | Pik_H04-2     |                       | S      | k006              | H10-060-1      | S               | S                | S               | S       | S                | S             | R     | S              | S               | R               | R             | S        | S          | S             | R               | R       | S       | R      | R       |
| US-3(H)             | -             | (Susceptible check)   | S      | k000              | H09-117-1      | S               | S                | S               | S       | S                | S             | S     | S              | S               | S               | S             | S        | S          | S             | S               | S       | S       | S      | S       |

S, Susceptible, infection type 4–5

R, Resistant, infection type 0–2 and intermediate, infection type 3

<sup>a</sup> New gene: the alleles that differ from known resistance alleles against 19 blast isolates tested.

<sup>b</sup> Codes that represent reaction types of rice blast isolates to the differentials for *Pik* locus genes.



Supplemental Table 6. Detailed information of the PCR-based markers developed in this study

| Target locus | Marker name <sup>a</sup> | Forward primer sequence (5' to 3') | Reverse primer sequence (5' to 3') | Marker type | Chr. | Position of 5' end of forward and reverse primers |          | Product size (bp) <sup>b, c</sup> | Expected product size of the other variety (bp) <sup>d</sup> | Number of alleles <sup>e</sup> | Annealing temperature (°C) <sup>f</sup> |    |    | Note in PCR conditions <sup>g</sup> | Agarose gel (%) | Position of CDS start <sup>h</sup> | Distance from CDS start (kb) <sup>i</sup> | Note                                                               |                         |
|--------------|--------------------------|------------------------------------|------------------------------------|-------------|------|---------------------------------------------------|----------|-----------------------------------|--------------------------------------------------------------|--------------------------------|-----------------------------------------|----|----|-------------------------------------|-----------------|------------------------------------|-------------------------------------------|--------------------------------------------------------------------|-------------------------|
|              |                          |                                    |                                    |             |      | Start                                             | End      |                                   |                                                              |                                | 50                                      | 55 | 60 |                                     |                 |                                    |                                           |                                                                    |                         |
|              |                          |                                    |                                    |             |      |                                                   |          |                                   |                                                              |                                |                                         |    |    |                                     |                 |                                    |                                           |                                                                    |                         |
| <i>Pit</i>   | Pit-ID004                | GCGAGCTCATTATACCTCCTCC             | CTCCCTCCCAACCAGCAA                 | InDel       | 1    | 2588798                                           | 2588890  | 93                                | 104                                                          | 2                              | -                                       | ○  | -  | -                                   | 4               | 2682019                            | -93.2                                     |                                                                    |                         |
| <i>Pit</i>   | Pit-ID005                | CTGATTAGATGGAACTGGAGCG             | CCCTATATATCTCTGTCCATGGT            | InDel       | 1    | 2593530                                           | 2593646  | 117                               | 103                                                          | 3                              | -                                       | ○  | -  | -                                   | 4               | 2682019                            | -88.5                                     |                                                                    |                         |
| <i>Pit</i>   | Pit-ID006                | CGCACACGATCTTAAAGTGGT              | AAGCATATCGTGACCTTCTGC              | InDel       | 1    | 2598062                                           | 2598161  | 100                               | 87                                                           | 2                              | -                                       | ○  | -  | -                                   | 4               | 2682019                            | -84.0                                     |                                                                    |                         |
| <i>Pit</i>   | Pit-ID007                | ATCGTTTAGATGCAGGCGAG               | ATCATCGAGGGTTTGGCCTTA              | InDel       | 1    | 2627002                                           | 2627108  | 107                               | 95                                                           | 4                              | ‡                                       | ○  | -  | -                                   | 4               | 2682019                            | -55.0                                     |                                                                    |                         |
| <i>Pit</i>   | Pit-ID008                | TCCTGATTCATCTCGCACGTA              | GAACCTGGAGGGGCAATTCATC             | InDel       | 1    | 2673971                                           | 2674066  | 96                                | 106                                                          | 5                              | -                                       | x  | ○  | -                                   | 4               | 2682019                            | -8.0                                      |                                                                    |                         |
| <i>Pit</i>   | Pit-ID001                | TGGAGCATGGATGTTGGAGTT              | ACTAACCAATTCAACAATCTCTTT           | InDel       | 1    | 2675422                                           | 2675541  | 120                               | 184                                                          | 3                              | ‡                                       | -  | ○  | x                                   | -               | 4                                  | 2682019                                   | -6.6                                                               |                         |
| <i>Pit</i>   | Pit-ID002                | GCAGGATGCTGCTACACTAG               | CACAAGATTTGGACAAGAACC              | InDel       | 1    | 2675706                                           | 2675961  | 256                               | 116                                                          | 3                              | -                                       | ○  | ○  | -                                   | 4               | 2682019                            | -6.3                                      |                                                                    |                         |
| <i>Pit</i>   | Pit-ID003                | † CCTGAAACACATTACTAGTTG            | AGAAAGAAGCATAAGTTAAAATAGA          | InDel       | 1    | 2676307                                           | 2676466  | 160                               | 190                                                          | 2                              | -                                       | ○  | -  | -                                   | 4               | 2682019                            | -5.7                                      |                                                                    |                         |
| <i>Pit</i>   | Pit-ID009                | GGCTTAGGTTGGTCTAGTTGT              | AGTATGAAACAGTGAAGCAATTT            | InDel       | 1    | 2724180                                           | 2724299  | 120                               | 105                                                          | 2                              | -                                       | ○  | -  | -                                   | 4               | 2682019                            | 42.2                                      |                                                                    |                         |
| <i>Pit</i>   | Pit-ID010                | TGAAGGCCTCTGTCCCCTTTG              | AGGAAGGAGGACCACTCGACA              | InDel       | 1    | 2742038                                           | 2742128  | 91                                | 105                                                          | 2                              | -                                       | ○  | -  | -                                   | 4               | 2682019                            | 60.0                                      |                                                                    |                         |
| <i>Pit</i>   | Pit-ID011                | TGTTTCACTTATAGAACATATCCCA          | CAATTTCTGCCCTTTGGTTTG              | InDel       | 1    | 2745995                                           | 2746074  | 80                                | 90                                                           | 2                              | -                                       | ○  | -  | -                                   | 4               | 2682019                            | 64.0                                      |                                                                    |                         |
| <i>Pit</i>   | Pit-ID012                | CCTTCTAGGGCCACCAAGAT               | GGGTAGCAGGCAATGACCGATG             | InDel       | 1    | 2757976                                           | 2758067  | 92                                | 81                                                           | 3                              | ‡                                       | -  | x  | ○                                   | -               | 4                                  | 2682019                                   | 76.0                                                               |                         |
| <i>Pit</i>   | Pit-ID013                | TGCTCTCCTTCTAGGAGATG               | CAAGATTCATTGAATGGAGGGC             | InDel       | 1    | 2760881                                           | 2760961  | 81                                | 92                                                           | 2                              | -                                       | ○  | -  | -                                   | 4               | 2682019                            | 78.9                                      |                                                                    |                         |
| <i>Pit</i>   | Pit-ID014                | GATGGGACGTTTTCAAGTATAA             | CCTCTGCCTAAATGAAACT                | InDel       | 1    | 2769914                                           | 2770005  | 92                                | 81                                                           | 2                              | -                                       | ○  | -  | -                                   | 4               | 2682019                            | 87.9                                      |                                                                    |                         |
| <i>Pit</i>   | Pit-ID015                | GGTTCAGGATTGCTAAGATTGGT            | TCCAGCAACTTACACTGACTCCA            | InDel       | 1    | 2770718                                           | 2770824  | 107                               | 94                                                           | 2                              | -                                       | ○  | -  | -                                   | 4               | 2682019                            | 88.7                                      |                                                                    |                         |
| <i>Pit</i>   | Pit-ID016                | TCCACGGGATGCTGCCCG                 | GGGCTAATCGATGCCGCT                 | InDel       | 1    | 2781269                                           | 2781368  | 100                               | 89                                                           | 2                              | -                                       | ○  | -  | -                                   | 4               | 2682019                            | 99.3                                      |                                                                    |                         |
| <i>Pish</i>  | Pish-ID001               | GGTGCTGCATTGGGAGAAACG              | ACGTAGCAATGATGTAATGCCAT            | InDel       | 1    | 32964710                                          | 32964799 | 90                                | 75                                                           | 2                              | -                                       | ○  | -  | -                                   | 4               | 33141127                           | -176.4                                    |                                                                    |                         |
| <i>Pish</i>  | Pish-ID002               | CCATGCCAAGGATCTCGAC                | CGGAAGCGAGGGTGGTGG                 | InDel       | 1    | 32979522                                          | 32979626 | 105                               | 117                                                          | 2                              | -                                       | ○  | -  | -                                   | 4               | 33141127                           | -161.6                                    |                                                                    |                         |
| <i>Pish</i>  | Pish-ID003               | AAATGTAACCCATCCCAAGAT              | AGGATAAAACATAATTACTGTTTAAAT        | InDel       | 1    | 32999102                                          | 32999193 | 92                                | 80                                                           | 2                              | x                                       | ○  | -  | -                                   | 4               | 33141127                           | -142.0                                    |                                                                    |                         |
| <i>Pish</i>  | Pish-ID004               | GCTTGTGATTTTGGAAAGGAC              | TACTCTCGTACTGGTCATTGGG             | InDel       | 1    | 33030685                                          | 33030784 | 100                               | 87                                                           | 2                              | -                                       | ○  | -  | -                                   | 4               | 33141127                           | -110.4                                    |                                                                    |                         |
| <i>Pish</i>  | Pish-ID005               | TGAGAAGCAACCATTAGTCTGCT            | AATCTCGCATATACCTCGAAAC             | InDel       | 1    | 33049598                                          | 33049686 | 89                                | 76                                                           | 2                              | -                                       | ○  | -  | -                                   | 4               | 33141127                           | -91.5                                     |                                                                    |                         |
| <i>Pish</i>  | Pish-ID006               | TCCTATGTTGGTGTGAGGCTT              | GGAGAAATCCACTCTATAAACAATCT         | InDel       | 1    | 33069775                                          | 33069870 | 96                                | 83                                                           | 2                              | -                                       | ○  | -  | -                                   | 4               | 33141127                           | -71.4                                     |                                                                    |                         |
| <i>Pish</i>  | Pish-ID007               | † TACACCGCTCGGCTTTTCAAC            | ATGCCCTCGTTGCAAGC                  | InDel       | 1    | 33085522                                          | 33085621 | 100                               | 87                                                           | 2                              | -                                       | ○  | -  | -                                   | 4               | 33141127                           | -55.6                                     |                                                                    |                         |
| <i>Pish</i>  | Pish-ID008               | CACCTGGAAATGAAAGTGACAC             | ATCTGAAGAAAGGACGGCGAT              | InDel       | 1    | 33085548                                          | 33085646 | 99                                | 87                                                           | 3                              | ‡                                       | -  | ○  | -                                   | 4               | 33141127                           | -55.6                                     |                                                                    |                         |
| <i>Pish</i>  | Pish-ID009               | CAAGCGCCCAACGTTGTT                 | GGGAGGATCACGTTACGCGC               | InDel       | 1    | 33182369                                          | 33182467 | 99                                | 84                                                           | 2                              | -                                       | ○  | -  | -                                   | 4               | 33141127                           | 41.2                                      |                                                                    |                         |
| <i>Pish</i>  | Pish-ID010               | † TGTCACATATATGATAATTGTGAGG        | TCAATCACCCGTTAGATCAT               | InDel       | 1    | 33206534                                          | 33206627 | 94                                | 81                                                           | 2                              | ○                                       | x  | -  | -                                   | 4               | 33141127                           | 65.4                                      |                                                                    |                         |
| <i>Pish</i>  | Pish-ID011               | † AGCACCTTGACACTCCACAGG            | GGCAAAACCCGTTGTTGAGC               | InDel       | 1    | 33229984                                          | 33230085 | 102                               | 116                                                          | 2                              | -                                       | ○  | -  | -                                   | 4               | 33141127                           | 88.9                                      |                                                                    |                         |
| <i>Pish</i>  | Pish-ID012               | ATGGGTTTGGATTGATCAACA              | TGATGGTTTGAATGGAAGCA               | InDel       | 1    | 33260968                                          | 33261086 | 119                               | 108                                                          | 2                              | -                                       | x  | ○  | -                                   | 4               | 33141127                           | 119.8                                     |                                                                    |                         |
| <i>Pish</i>  | Pish-ID013               | CCGCTAGGCTCGGTTATGAAAA             | TGGTGTGAGGGCGGACAGAC               | InDel       | 1    | 33299166                                          | 33299264 | 99                                | 86                                                           | 2                              | -                                       | ○  | -  | -                                   | 4               | 33141127                           | 158.0                                     |                                                                    |                         |
| <i>Pish</i>  | Pish-ID014               | GTGCCTCCCACTGCTGAAGCT              | AGGACCGCTCAAGAGCTTGT               | InDel       | 1    | 33330985                                          | 33331065 | 81                                | 93                                                           | 2                              | ○                                       | ○  | -  | -                                   | 4               | 33141127                           | 189.9                                     | slightly weak band                                                 |                         |
| <i>Pib</i>   | Pib-ID07                 | AAGGTATGGAGGAGGCGC                 | CGAAAAACCCCAAGCCCTTAA              | InDel       | 2    | 35013753                                          | 35013853 | 101                               | 87                                                           | 2                              | -                                       | ○  | -  | -                                   | 4               | 35108842                           | -95.1                                     |                                                                    |                         |
| <i>Pib</i>   | Pib-ID08                 | ATCTGTGTTGGTCAAGGCAAC              | GTTTAGCAGCATTCCCTTGGG              | InDel       | 2    | 35016942                                          | 35017047 | 106                               | 95                                                           | 2                              | -                                       | ○  | -  | -                                   | 4               | 35108842                           | -91.9                                     |                                                                    |                         |
| <i>Pib</i>   | Pib-ID09                 | TGAAGGTGACTCTGTGTCCTA              | CCTGCAATCACCTATTGACGT              | InDel       | 2    | 35020876                                          | 35020992 | 117                               | 104                                                          | 2                              | -                                       | ○  | -  | -                                   | 4               | 35108842                           | -88.0                                     |                                                                    |                         |
| <i>Pib</i>   | Pib-ID10                 | ACACCGATTGTACACGAGGGC              | AGGCAAGCTCCATGCGGAC                | InDel       | 2    | 35086284                                          | 35086388 | 105                               | 95                                                           | 2                              | -                                       | ○  | -  | -                                   | 4               | 35108842                           | -22.6                                     |                                                                    |                         |
| <i>Pib</i>   | Pib-ID11                 | † AGAGTGGTTGGTGGAGGGT              | GCCCAATGCTTGTCTCAA                 | InDel       | 2    | 35090751                                          | 35090853 | 103                               | 92                                                           | 2                              | -                                       | ○  | -  | -                                   | 4               | 35108842                           | -18.1                                     |                                                                    |                         |
| <i>Pib</i>   | Pib-ID01                 | CATCCATCAATGCACAGTCA               | ATCCAATCAAGATGATATTTGTGCA          | InDel       | 2    | 35111917                                          | 35112061 | 145                               | 119                                                          | 2                              | -                                       | ○  | -  | -                                   | 4               | 35108842                           | 3.1                                       |                                                                    |                         |
| <i>Pib</i>   | Pib-ID12                 | ATCATCATGCCCGCTCC                  | GAGGGATGGAGAGGGGAAAG               | InDel       | 2    | 35117756                                          | 35117844 | 89                                | 99                                                           | 3                              | ‡                                       | -  | x  | ○                                   | -               | 4                                  | 35108842                                  | 8.9                                                                | weak band in 89-bp long |
| <i>Pib</i>   | Pib-ID02                 | TGCTCTCACACTCGGTGC                 | AATGGGTTGGTGGCTTGT                 | InDel       | 2    | 35118755                                          | 35118873 | 119                               | 145                                                          | 3                              | -                                       | ○  | -  | -                                   | 4               | 35108842                           | 9.9                                       |                                                                    |                         |
| <i>Pib</i>   | Pib-ID13                 | TCTCAAAGCTCCATGGAAAGCTA            | ATCACCTTTCAGTGCTCTAA               | InDel       | 2    | 35144462                                          | 35144554 | 93                                | 85                                                           | 3                              | -                                       | ○  | -  | -                                   | 4               | 35108842                           | 35.6                                      |                                                                    |                         |
| <i>Pib</i>   | Pib-ID14                 | CTCCTCGCTGGTGGTGGT                 | GTGATTCATGGGAGCTAATCT              | InDel       | 2    | 35176847                                          | 35176931 | 85                                | 75                                                           | 2                              | -                                       | ○  | -  | -                                   | 4               | 35108842                           | 68.0                                      |                                                                    |                         |
| <i>Pib</i>   | Pib-ID15                 | GCTTACAAAACTACCAAGACAGC            | GGTTATCATCTCTTTTCAATGGCT           | InDel       | 2    | 35183346                                          | 35183445 | 100                               | 94                                                           | 3                              | -                                       | ○  | -  | -                                   | 4               | 35108842                           | 74.5                                      | 86-bp long is genotype C.                                          |                         |
| <i>Piz</i>   | Piz-ID16                 | GGGTACAATTGGCCCAACTGC              | GGGGTAACATTGAGTGTCTTCT             | InDel       | 6    | 10356451                                          | 10356548 | 98                                | 111                                                          | 2                              | -                                       | ○  | -  | -                                   | 4               | 10372676                           | -16.2                                     |                                                                    |                         |
| <i>Piz</i>   | Piz-ID17                 | CAGATCGGCCCAACTC                   | GCTCTCTCTCTCAGATTAG                | InDel       | 6    | 10358203                                          | 10358301 | 99                                | 88                                                           | 4                              | -                                       | ○  | -  | -                                   | 4               | 10372676                           | -14.5                                     |                                                                    |                         |
| <i>Piz</i>   | Piz-ID18                 | † CTGCTGCTACCTTTGGAAAGTCA          | CTCTGGCCCAACGGCTC                  | InDel       | 6    | 10358477                                          | 10358524 | 98                                | 84                                                           | 2                              | -                                       | ○  | -  | -                                   | 4               | 10372676                           | -14.2                                     |                                                                    |                         |
| <i>Piz</i>   | Piz-ID19                 | ACCATGGCTACGTTTAAAACCTACA          | ACACACGCTCGTTTTACAATTCAA           | InDel       | 6    | 10370810                                          | 10370906 | 97                                | 107                                                          | 2                              | ○                                       | ○  | -  | -                                   | 4               | 10372676                           | -1.9                                      | slightly weak band                                                 |                         |
| <i>Piz</i>   | Piz-ID20                 | TTTCCACTCGATTCTCTCCTCC             | GGATGAGAGGAGCACGCA                 | InDel       | 6    | 10372159                                          | 10372256 | 98                                | 110                                                          | 3                              | -                                       | ○  | -  | -                                   | 4               | 10372676                           | -0.5                                      |                                                                    |                         |
| <i>Piz</i>   | Piz-ID21                 | CGACTCGGCTTCCATGGC                 | TGATCTCAATCCGTTGGAATCAC            | InDel       | 6    | 10376083                                          | 10376164 | 82                                | 100                                                          | 2                              | -                                       | x  | -  | *                                   | 4               | 10372676                           | 3.4                                       | 40 cycles (55°C), weak band                                        |                         |
| <i>Piz</i>   | Piz-ID22                 | † ATGTGGGTTTCTGATTTCCAAT           | CTTGATTAGTGAGATCCATTGTCC           | InDel       | 6    | 10381442                                          | 10381568 | 127                               | 100                                                          | 3                              | -                                       | ○  | -  | -                                   | 4               | 10372676                           | 8.8                                       | 118-bp long is genotype C (P19 type, see Supplemental Fig. 11-4B). |                         |
| <i>Piz</i>   | Piz-ID23                 | TCTTATAGTGGGATGGGAGCC              | GAAGAGAATCATATCCCTCAACT            | InDel       | 6    | 10381739                                          | 10381834 | 96                                | 106                                                          | 2                              | -                                       | ○  | -  | -                                   | 4               | 10372676                           | 9.1                                       |                                                                    |                         |
| <i>Piz</i>   | Piz-ID24                 | CGAAGAAGCATCTGGTACGTA              | GCACAAGGATGATCAATGGCA              | InDel       | 6    | 10382105                                          | 10382292 | 188                               | 289                                                          | 3                              | -                                       | ○  | -  | -                                   | 4               | 10372676                           | 9.4                                       |                                                                    |                         |
| <i>Piz</i>   | Piz-ID25                 | AGGACATCTGGTACGACTCGCA             | TCTTCTAGTCTTCGAGCTCTCT             | InDel       | 6    | 10382110                                          | 10382226 | 117                               | 218                                                          | 3                              | -                                       | ○  | -  | -                                   | 4               | 10372676                           | 9.4                                       |                                                                    |                         |
| <i>Piz</i>   | Piz-ID26                 | ATTGCCGAGGCTCCTAAGTGTG             | GGGATGGCAGATGAAGCAGAA              | InDel       | 6    | 10382995                                          | 10383098 | 104                               | 93                                                           | 2                              | -                                       | ○  | -  | -                                   | 4               | 10372676                           | 10.3                                      |                                                                    |                         |
| <i>Piz</i>   | Piz-ID27                 | TGCTTACTGCTGACTCGGCTA              | AGAGCGACGACGATAGGGGCTCA            | InDel       | 6    | 10383080                                          | 10383222 | 143                               | 92                                                           | 2                              | -                                       | ○  | -  | -                                   | 4               | 10372676                           | 10.4                                      |                                                                    |                         |
| <i>Piz</i>   | Piz-ID28                 | AGTTCAAGTGTGCTGTGGCA               | TCTCACAGCATGTTGGACTGC              | InDel       | 6    | 10383104                                          | 10383329 | 226                               | 176                                                          | 2                              | -                                       | ○  | -  | *                                   | 4               | 10372676                           | 10.4                                      | 40 cycles (55°C), weak band                                        |                         |
| <i>Piz</i>   | Piz-ID06                 | TTTGCATGGCAAGAAATGTTCA             | GTACCAAGCTCAACCAAGCAA              | InDel       | 6    | 10387071                                          | 10387225 | 155                               | 196                                                          | 2                              | ‡                                       | -  | ○  | -                                   | 4               | 10372676                           | 14.4                                      | 155-bp long was very weak (almost absent).                         |                         |
| <i>Piz</i>   | Piz-ID29                 | ATGACTCTCGCGCATGGAAAT              | GGAGCCCAAGTTAAGTTGGAATGGT          | InDel       | 6    | 10418509                                          | 10418620 | 112                               | 81                                                           | 3                              | ‡                                       | -  | ○  | -                                   | 4               | 10372676                           | 45.8                                      |                                                                    |                         |
| <i>Piz</i>   | Piz-ID30                 | CGCTGGAAACAAATAGTGTG               | AGGGTTAAAATGAAATGACCTACCA          | InDel       | 6    | 10432418                                          | 10432516 | 99                                | 113                                                          | 2                              | -                                       | ○  | -  | -                                   | 4               | 10372676                           | 59.7                                      |                                                                    |                         |
| <i>Piz</i>   | Piz-ID31                 | † CCAATTTACGGCTAGTTGAT             | AGCTATTATTAAAGCTGATTTCTCA          | InDel       | 6    | 10434241                                          | 10434347 | 107                               | 84                                                           | 2                              | -                                       | ○  | -  | -                                   | 4               | 10372676                           | 61.6                                      |                                                                    |                         |
| <i>Piz</i>   | Piz-ID32                 | AGTCAACGGGATGCTGATTCG              | ACTGCAGGAGATCACTGACCT              | InDel       | 6    | 10436065                                          | 10436310 | 246                               | 216                                                          | 3                              | -                                       | ○  | -  | -                                   | 4               | 10372676                           | 63.4                                      |                                                                    |                         |
| <i>Piz</i>   | Piz-ID33                 | GGGATGCTCGATTGTTACATT              | GGCCAATCCGAGTGCTTTTAT              | InDel       | 6    | 10436072                                          | 10436274 | 203                               | 173                                                          | 3                              | -                                       | ○  | -  | -                                   | 4               | 10372676                           | 63.4                                      |                                                                    |                         |
| <i>Piz</i>   | Piz-ID34                 | AGCCATGTAATGTCTAAAATTTGCTCT        | CCATCTTTCAGCTGTCACTCAGG            | InDel       | 6    | 10437522                                          | 10437601 | 80                                | 97                                                           | 2                              | -                                       | ○  | -  | -                                   | 4               | 10372676                           | 64.8                                      |                                                                    |                         |
| <i>Piz</i>   | Piz-ID08                 | GCCATGTAATGTCTAAAATTTGCTCT         | TTGCTCCACCCAGCTTTTCA               | InDel       | 6    | 10437523                                          | 10437639 | 117                               | 134                                                          | 2                              | -                                       | ○  | -  | -                                   | 4               | 10372676                           | 64.8                                      |                                                                    |                         |
| <i>Piz</i>   | Piz-ID35                 | GCTAACCTCAAAGCCTCGAGA              | ATGATGCACCTTTGGCTCTGA              | InDel       | 6    | 10440133                                          | 10440231 | 99                                | 117                                                          | 3                              | ‡                                       |    |    |                                     |                 |                                    |                                           |                                                                    |                         |



(Continued)

|      |              |                             |                           |       |        |          |          |     |          |     |   |   |   |   |        |          |                                                                                        |
|------|--------------|-----------------------------|---------------------------|-------|--------|----------|----------|-----|----------|-----|---|---|---|---|--------|----------|----------------------------------------------------------------------------------------|
| Pi13 | Pi13-ID001   | ACGCTAGGCAAGCTAATAA         | TTGCTATTGGAACCTAGCGT      | InDel | 6      | 16972636 | 16972746 | 111 | 99       | 2   | ○ | x | - | - | 4      | 17160636 | -188.0                                                                                 |
| Pi13 | Pi13-ID002   | GGCTCGCAAAGAACTGCAAA        | GGCACTCTCCCAACTTTAC       | InDel | 6      | 17005386 | 17005498 | 113 | 126      | 3 ‡ | - | x | ○ | - | 4      | 17160636 | -155.3                                                                                 |
| Pi13 | Pi13-ID003   | AAATTAAGCACAGGTTTACAC       | GCAGATGAGTTATCGGTTTC      | InDel | 6      | 17043979 | 17044073 | 95  | 85       | 2   | - | ○ | - | - | 4      | 17160636 | -116.7                                                                                 |
| Pi13 | Pi13-ID004   | TTTACCGAGCTTAGCTTGAG        | GTGCAACACATGCTAATTTAT     | InDel | 6      | 17092963 | 17093061 | 99  | 89       | 2   | ○ | x | - | - | 4      | 17160636 | -67.7                                                                                  |
| Pi13 | Pi13-ID005   | CGGCTAGCTGCTCGATTAACT       | TGATGTGACTTAATGAGAAAGAGA  | InDel | 6      | 17101929 | 17102023 | 95  | 85       | 2   | ○ | x | - | - | 4      | 17160636 | -58.7                                                                                  |
| Pi13 | Pi13-ID006   | ACCTGGTACACCATACAGTCA       | AAGTACTAAACTTTCCATGCCT    | InDel | 6      | 17108731 | 17108839 | 109 | 95       | 2   | - | ○ | - | - | 4      | 17160636 | -51.9                                                                                  |
| Pi13 | Pi13-ID007   | AGAATAAGCTAAGAACTTTGT       | TTCTCTGGATGAGCTTTT        | InDel | 6      | 17109367 | 17109467 | 101 | 91       | 2   | ○ | x | - | - | 4      | 17160636 | -51.3 slightly weak band                                                               |
| Pi13 | Pi13-ID008 † | GTGAGTGGAACTAGTAGCGA        | GTCAAAGTTCCTGCAATTTGTGA   | InDel | 6      | 17126121 | 17126234 | 114 | 88       | 2   | - | ○ | - | - | 4      | 17160636 | -34.5                                                                                  |
| Pi13 | Pi13-ID009   | TGACTTAGTCCCTGCATACGT       | TGACATGTGGGACTCATATTTGT   | InDel | 6      | 17144666 | 17144758 | 93  | 82       | 2   | - | x | ○ | - | 4      | 17160636 | -16.0                                                                                  |
| Pi13 | Pi13-ID010   | TCTACTTTCACAATCTCTAATTAACAA | ACGGGTAAAATTTGCTACTCCC    | InDel | 6      | 17155715 | 17155804 | 90  | 104      | 2   | - | ○ | - | - | 4      | 17160636 | -4.9 slightly weak band                                                                |
| Pi13 | Pi13-ID011   | CCATACGACAGCAGGCAATCCC      | GGGTGGTTCACGGGGAAGAAAA    | InDel | 6      | 17155951 | 17156044 | 94  | 80       | 2   | - | ○ | - | - | 4      | 17160636 | -4.7                                                                                   |
| Pi13 | Pi13-ID012   | AAGAATAACAATCGCCGGAAC       | TGGATCTTTCTTGCTAGCTCG     | InDel | 6      | 17164450 | 17164557 | 108 | 87       | 2   | - | ○ | - | - | 4      | 17160636 | 3.8                                                                                    |
| Pi13 | Pi13-ID013   | AAATCCGCTAGCTATTCTGGG       | CTTGCCCAAGTTGACTCAA       | InDel | 6      | 17215797 | 17215915 | 119 | 156      | 2   | - | x | ○ | - | 4      | 17160636 | 55.2                                                                                   |
| Pi13 | Pi13-ID014   | CTTCATCAAAAAGCCACAACAT      | TTCTTACTACTACAATTTCTTCA   | InDel | 6      | 17289117 | 17289227 | 111 | 97       | 2   | ○ | x | - | - | 4      | 17160636 | 128.5                                                                                  |
| Pi13 | Pi13-ID015   | AGAGATTTGAAACTAAGTGAAGTAAAG | TCATGCACAGCAATGAGAA       | InDel | 6      | 17313656 | 17313808 | 153 | 173      | 2   | - | ○ | - | - | 4      | 17160636 | 153.0                                                                                  |
| Pi13 | Pi13-ID016   | GCTGCCTGACCTGTTTTTC         | CCAAGTTGACGTCCACTTGT      | InDel | 6      | 17358343 | 17358442 | 100 | 90       | 2   | - | ○ | - | - | 4      | 17160636 | 197.7                                                                                  |
| Pii  | Pii-ID02     | TCTGAATCTTGTAGCTCCCTATGC    | TGGCAACGCGTATTGGTGTCT     | InDel | 9      | 9632867  | 9633449  | 583 | 266      | 2   | - | ○ | - | - | 3 or 4 | 9667216  | -34.3                                                                                  |
| Pii  | Pii-ID01     | CCTCCATGCATGGTAGAAA         | TCCTCGTCGGCTCTGTAG        | InDel | 9      | 9632883  | 9633513  | 631 | 314      | 2   | - | ○ | - | - | 3 or 4 | 9667216  | -34.3                                                                                  |
| Pii  | Pii-ID04     | CAGCCCAAACCATGCACAAC        | TTCTCGTGCATGTGCTGAA       | InDel | 9      | 9640689  | 9640960  | 272 | 294      | 2   | - | ○ | - | - | 4      | 9667216  | -26.5                                                                                  |
| Pii  | Pii-ID18     | TGAAATCTCCAATCCCTTAAAA      | AGTTCCACCCTTCGATAAAA      | InDel | 9      | 9648658  | 9648776  | 119 | 106      | 2   | ○ | x | - | - | 4      | 9667216  | -18.6                                                                                  |
| Pii  | Pii-ID07 †   | TTCGGTCATTAGCCGGTGCT        | GGCGCCAGGTATGGTACTCA      | InDel | 9      | 9667928  | 9668377  | 450 | 289      | 3   | - | ○ | - | - | 3 or 4 | 9667216  | 0.7 493-bp long is genotype C (see Supplemental Fig. 11-6B).                           |
| Pii  | Pii-ID19     | TATCTATGTTACTATACCATGA      | ACATGTTGTATAGCGTATGAA     | InDel | 9      | 9763380  | 9763467  | 88  | 99       | 3 ‡ | ○ | x | - | - | 4      | 9667216  | 96.2 slightly weak band                                                                |
| Pii  | Pii-ID20     | AGGCTACCACTCACTCTGAA        | ATTTTGGCGAGATTGAGACT      | InDel | 9      | 9781213  | 9781307  | 95  | 82       | 3 ‡ | - | ○ | - | - | 4      | 9667216  | 114.0                                                                                  |
| Pii  | Pii-ID21 †   | AAGGGAACGACTCTAGTAGAA       | TCTCCATATGTATGTAACCTGGCTT | InDel | 9      | 9789035  | 9789118  | 84  | 96       | 2   | - | ○ | - | - | 4      | 9667216  | 121.8                                                                                  |
| Pii  | Pii-ID22     | TGGATCTGGACGGTTCAATTG       | AACTCCGTAAGAATGTGGGTTG    | InDel | 9      | 9792715  | 9792808  | 94  | 81       | 3 ‡ | - | ○ | - | - | 4      | 9667216  | 125.5                                                                                  |
| Pii  | Pii-ID23     | TGACGGTTTCAATTTGTTCCCT      | ACAACCACCAACTCGCTAAGA     | InDel | 9      | 9792721  | 9792818  | 98  | 85       | 3 ‡ | - | ○ | - | - | 4      | 9667216  | 125.5                                                                                  |
| Pii  | Pii-ID24 †   | ATGAGGAGATGACCAACGAGGAG     | GAAGAGGGGAACGCGGAG        | InDel | 9      | 9839676  | 9839775  | 100 | 88       | 2   | - | ○ | - | - | 4      | 9667216  | 172.5                                                                                  |
| Pii  | Pii-ID25     | CGGAGAGCCACGCCGCGC          | GCCAGATGATCGCAGCGGC       | InDel | 9      | 9839705  | 9839804  | 100 | 88       | 2   | - | x | ○ | - | 4      | 9667216  | 172.5                                                                                  |
| Pii  | Pii-ID26     | AGGTTTGGAACTGATGGCGTA       | TCGGCACTCAATTCCTAGTCTC    | InDel | 9      | 9848951  | 9849053  | 103 | 91       | 3 ‡ | - | ○ | - | - | 4      | 9667216  | 181.7                                                                                  |
| Pia  | Pia-ID02     | GTAGCGTTCCTCCACCACTT        | TCTGGAAGGTCGGCCAGC        | InDel | 11     | 6375786  | 6375885  | 100 | 89       | 2   | - | ○ | - | - | 4      | 6542301  | -166.5                                                                                 |
| Pia  | Pia-ID03     | TGCTCCAGGGGCTCTGCAG         | CTCCAGGATGTAGTTCCGGCTC    | InDel | 11     | 6400787  | 6400901  | 115 | 101      | 2   | - | ○ | - | - | 4      | 6542301  | -141.5                                                                                 |
| Pia  | Pia-ID04     | CCGAATCTAACCGCAGATG         | CGACAAGACAAGACTCAAAT      | InDel | 11     | 6522517  | 6522610  | 94  | 84       | 2   | - | x | ○ | - | 4      | 6542301  | -19.8                                                                                  |
| Pia  | Pia-ID05     | ATAATTTGAGTCCAAACATACGGT    | TCAATCCATGCTGAATCAACTCT   | InDel | 11     | 6523786  | 6523865  | 80  | 92       | 2   | - | ○ | - | - | 4      | 6542301  | -18.5 slightly weak band                                                               |
| Pia  | Pia-ID01_2 † | ACGGTAGAGCAATTTAGAAGCAGTGA  | AGTGCAGCTGACACTTTCAATAGCA | InDel | 11     | 6544602  | 6544796  | 195 | 152      | 2   | - | ○ | - | - | 4      | 6542301  | 2.3                                                                                    |
| Pia  | Pia-ID06     | TAGTGTCCATATGTTTGTGGCG      | ACATCGGCTACTATCAAACCA     | InDel | 11     | 6562152  | 6562231  | 80  | 91       | 3 ‡ | ○ | - | - | - | 4      | 6542301  | 19.9                                                                                   |
| Pik  | Pik-ID001 †  | CTTCTTAGCCTCCAATTTGCA       | TCATGTGCATCAAATGGGCTA     | InDel | 11     | 27743108 | 27743207 | 100 | 88       | 2   | - | ○ | - | - | 4      | 27978523 | -235.4 slightly weak band                                                              |
| Pik  | Pik-ID002    | CATGCTGATACCTATAGCGA        | TCCAACAGAATCCTATGTGATGA   | InDel | 11     | 27778163 | 27778267 | 105 | 95       | 3 ‡ | - | ○ | - | - | 4      | 27978523 | -200.4                                                                                 |
| Pik  | Pik-ID003    | GTGGCCAAGTGTTCGATGGATG      | CGATGCAGTCACTGCAGCATCT    | InDel | 11     | 27785048 | 27785151 | 104 | 89       | 3 ‡ | - | ○ | - | - | 4      | 27978523 | -193.5                                                                                 |
| Pik  | Pik-ID004    | TCAAAGCTTGTTCATGGCGGC       | GAGGTGATGTATCTTCACTCCTCT  | InDel | 11     | 27791894 | 27791977 | 84  | 94       | 2   | - | x | ○ | - | 4      | 27978523 | -186.6                                                                                 |
| Pik  | Pik-ID005    | CTCACTGAGCTGCAATTTCACT      | TGCTCGCATCAGTTGAGGTA      | InDel | 11     | 27796760 | 27796859 | 100 | 90       | 2   | - | ○ | - | - | 4      | 27978523 | -181.8                                                                                 |
| Pik  | Pik-ID006    | CACGGTAATCTCTCTCATCACA      | ACTTTGAAAACTCAAACGCTAAA   | InDel | no hit | (27017)  | (27124)  | 108 | 120      | 3 ‡ | ○ | - | - | - | 4      | 27978523 | Not available The positions in parentheses are based on 'Kanto 51' sequence (AB616659) |
| Pik  | Pik-ID007 †  | AACGAATATTATGACTAAAGAAAGT   | AGAAGCTTGACTCCGGTAG       | InDel | no hit | (28817)  | (28936)  | 120 | 406      | 3 ‡ | - | ○ | - | - | 4      | 27978523 | Not available The positions in parentheses are based on 'Kanto 51' sequence (AB616659) |
| Pik  | Pik-ID008    | GGCGAGATCACCGGGGT           | AATATGTACGCGCCATCGA       | InDel | 11     | 27844029 | 27844120 | 92  | 80       | 2   | - | x | - | * | 4      | 27978523 | -134.5 2 STEP-PCR (see footnote g), weak band                                          |
| Pik  | Pik-ID009    | CGATACCGCGGAGAACGG          | CTGTGCTCATCGGCTCCAGAC     | InDel | 11     | 27844228 | 27844342 | 115 | 133      | 5   | - | x | - | * | 4      | 27978523 | -134.3 2 STEP-PCR (see footnote g), weak band                                          |
| Pik  | Pik-ID010    | GCCACCTTCTCCGGAGC           | GATGCTTCAGGATGGCGCAAG     | InDel | no hit | (44233)  | (44600)  | 368 | 396      | 3 ‡ | - | ○ | - | - | 4      | 27978523 | Not available The positions in parentheses are based on 'Kanto 51' sequence (AB616659) |
| Pik  | Pik-ID011    | GGTTAAATAGGACTCCTCTA        | GCATCCAATAGAACTCAGAGA     | InDel | no hit | (45995)  | (46163)  | 169 | 150      | 3 ‡ | - | ○ | - | - | 4      | 27978523 | Not available The positions in parentheses are based on 'Kanto 51' sequence (AB616659) |
| Pik  | Pik-ID012    | CAGGCCCAATCTCCACCC          | ACCCTGGAACCTGAAACCTCT     | InDel | no hit | (46412)  | (46543)  | 132 | 102, 104 | 3 ‡ | - | x | ○ | - | 4      | 27978523 | Not available The positions in parentheses are based on 'Kanto 51' sequence (AB616659) |
| Pik  | Pik-ID013    | GTGCAGTATTATGGCTCCG         | AACCTCTCCGACCAAGA         | InDel | no hit | (46374)  | (46530)  | 157 | 127, 129 | 3 ‡ | - | ○ | - | - | 4      | 27978523 | Not available The positions in parentheses are based on 'Kanto 51' sequence (AB616659) |
| Pik  | Pik-ID014 †  | TTCTCTTTTACCCGCTCTCT        | ATGAGAAAACGAAGATGAGAG     | InDel | no hit | (51647)  | (51990)  | 344 | 149, 150 | 3 ‡ | - | ○ | - | - | 4      | 27978523 | Not available The positions in parentheses are based on 'Kanto 51' sequence (AB616659) |
| Pik  | Pik-ID015    | TTATCCGCTCTTCCCGCAC         | CCAGATCTGGTAGAGAGGGCC     | InDel | no hit | (51654)  | (52053)  | 400 | 205, 206 | 3 ‡ | - | ○ | - | - | 4      | 27978523 | Not available The positions in parentheses are based on 'Kanto 51' sequence (AB616659) |
| Pik  | Pik-ID017    | GAGGGTGGACATGCAACAA         | GAGACAAGGCTGACTATTAATAAT  | InDel | 11     | 27995163 | 27995281 | 119 | 108      | 2   | - | ○ | - | - | 4      | 27978523 | 16.6                                                                                   |
| Pik  | Pik-ID018 †  | ATCTCTGTGTCTGAAGCAAT        | AGGCTCTCTGCTCCTATAAAC     | InDel | 11     | 27996941 | 27997050 | 110 | 100      | 2   | - | ○ | - | - | 4      | 27978523 | 18.4                                                                                   |
| Pik  | Pik-ID019    | TGCATACATTTGGCTAGAAACAAC    | TTTGTGGTTCACCGCTAAA       | InDel | 11     | 27997324 | 27997408 | 85  | 95       | 2   | - | ○ | - | - | 4      | 27978523 | 18.8 slightly weak band                                                                |
| Pik  | Pikm-ID06    | TGTTGCCAACAAATCCATCA        | TGCTTGCACATGGTGGAAAC      | InDel | 11     | 28002956 | 28003115 | 160 | 360      | 2   | - | ○ | - | - | 4      | 27978523 | 24.4                                                                                   |
| Pik  | Pik-ID021    | CAGTGCCCTTTCTTCTCATT        | AAGACAAAATAATGTGCGACGA    | InDel | 11     | 28004960 | 28005069 | 110 | 96       | 2   | - | ○ | - | - | 4      | 27978523 | 26.4                                                                                   |
| Pik  | Pik-ID022    | GGGTACGATGTAGAAATGGTGG      | TCACGCAAAAGCACAACAACC     | InDel | 11     | 28004994 | 28005113 | 120 | 107      | 2   | - | ○ | - | - | 4      | 27978523 | 26.5                                                                                   |
| Pik  | Pikm-ID07    | TCATTCAACTCGCTCCTCT         | TGCAGGTGGAGAGGGTTCTCT     | InDel | 11     | 28005464 | 28005557 | 94  | 103      | 3   | - | ○ | - | - | 4      | 27978523 | 26.9                                                                                   |
| Pik  | Pikm-ID08    | GAAAGCAAATAAAAAGGCAACAG     | CAACTTTGCAAATAACAATTCGACG | InDel | 11     | 28012610 | 28012721 | 112 | 88       | 2   | - | ○ | - | - | 4      | 27978523 | 34.1                                                                                   |

(Continued)

|               |                        |   |                             |                                     |          |    |          |          |     |     |     |   |   |   |   |   |          |        |                                                      |
|---------------|------------------------|---|-----------------------------|-------------------------------------|----------|----|----------|----------|-----|-----|-----|---|---|---|---|---|----------|--------|------------------------------------------------------|
| <i>Pita</i>   | <i>Pita</i> -ID13      | † | AGGCAAGAGTACAATGGAAAC       | TGCCCTCTGAAAATAAAGTTT               | InDel    | 12 | 10467644 | 10467743 | 100 | 112 | 2   | - | ○ | - | - | 4 | 10607519 | -139.9 | slightly weak band                                   |
| <i>Pita</i>   | <i>Pita</i> -ID14      |   | TCATGTAGTTGTAACACATGTT      | TGTTGGTGATTATGGCATGTTT              | InDel    | 12 | 10470430 | 10470549 | 120 | 105 | 2   | ○ | ○ | - | - | 4 | 10607519 | -137.1 | slightly weak band                                   |
| <i>Pita</i>   | <i>Pita</i> -ID15      |   | CCCTTACCTAGATCGAATGGGAT     | GGTCTGATCACTCCCTCCATAA              | InDel    | 12 | 10485998 | 10486117 | 120 | 134 | 2   | - | ○ | - | - | 4 | 10607519 | -121.5 |                                                      |
| <i>Pita</i>   | <i>Pita</i> -ID16      |   | TGGCAGAGTAAACAGCTCACT       | TCTAGTTCCTAACTACTGATACTGT           | InDel    | 12 | 10508155 | 10508273 | 119 | 96  | 2   | - | ○ | - | - | 4 | 10607519 | -99.4  |                                                      |
| <i>Pita</i>   | <i>Pita</i> -ID17      |   | TTTCTTACTGTTTGGCGCAT        | ACCACCTAGTAAAGAGCACTGTAGT           | InDel    | 12 | 10531581 | 10531690 | 110 | 89  | 2   | - | ○ | - | - | 4 | 10607519 | -75.9  |                                                      |
| <i>Pita</i>   | <i>Pita</i> -ID18      |   | AAAAGGTTTTAAAATCTCCCTTTT    | GCTGGTGGGCTAACTTGG                  | InDel    | 12 | 10560821 | 10560909 | 89  | 79  | 2   | ○ | × | - | - | 4 | 10607519 | -46.7  |                                                      |
| <i>Pita</i>   | <i>Pita</i> -ID04      | † | CGTGAAGAGGATCCGGTAGCA       | TGCCGTGGCTCTATCTTTA <sub>g</sub> TT | PCR-CTPP | 12 | 10607441 | 10607577 | 137 | 216 | 2   | - | - | - | * | 4 | 10607519 | -0.1   | 306-bp long is the common band between both alleles. |
|               |                        |   | CAAGTCAGGTTGAAGATGCATGC     | CCGACGCCGAGCACTCTAT                 |          | 12 | 10607531 | 10607746 |     |     |     |   |   |   |   | 4 | 10607519 | 0.0    |                                                      |
|               |                        |   | GATTCATCATCATCAGTGCC        | CAATGCCGAGTGTGCAISA                 |          | 12 | 10607796 | 10607937 |     |     |     |   |   |   | * | 4 | 10607519 | 0.3    |                                                      |
| <i>Pita</i>   | <i>Pita</i> -ID03      |   | CTCGTTGGCATTGAACCTTAGATTTAC | CCCAGGATGACCTTGACACT                | PCR-CTPP | 12 | 10607891 | 10608105 | 142 | 215 | 2   | - | - | - | * | 4 | 10607519 | 0.4    | 310-bp long is the common band between both alleles. |
|               |                        |   | CGTCTTAGATCCGTGTTATCGC      | GAGCATATCTGAGACGGGGAA               | InDel    | 12 | 10615423 | 10615525 | 103 | 122 | 2   | - | ○ | - | - | 4 | 10607519 | 7.9    |                                                      |
| <i>Pita</i>   | <i>Pita</i> -ID20      |   | AGAAAAACAATCGGGTTCACCA      | TATTCGCATGGATTTTACGGCT              | InDel    | 12 | 10618603 | 10618705 | 103 | 119 | 2   | - | ○ | - | - | 4 | 10607519 | 11.1   |                                                      |
| <i>Pita</i>   | <i>Pita</i> -ID21      |   | CGATGGAATATGATCGATGCAGT     | AAGTATTAGGGTAACTGGCA                | InDel    | 12 | 10623210 | 10623310 | 101 | 91  | 2   | - | ○ | - | - | 4 | 10607519 | 15.7   |                                                      |
| <i>Pita</i>   | <i>Pita</i> -ID22      |   | GGCAGCCGATTTGAGGATTTAA      | CTCCGATCCTGGGACGTG                  | InDel    | 12 | 10652892 | 10652981 | 90  | 109 | 3 † | - | ○ | - | - | 4 | 10607519 | 45.4   |                                                      |
| <i>Pita</i>   | <i>Pita</i> -ID23      |   | GTGAATTGCCATATTTCTTATCAGCT  | CAAGGGAGTTGGAGACAGTGT               | InDel    | 12 | 10691846 | 10691963 | 118 | 142 | 2   | - | ○ | - | - | 4 | 10607519 | 84.3   |                                                      |
| <i>Pita</i>   | <i>Pita</i> -ID24      |   | GGAGTGTCAAAGGCCTATTGG       | TCCACAGTATTAGGGAAGCTTCT             | InDel    | 12 | 10703096 | 10703214 | 119 | 83  | 2   | ○ | ○ | - | - | 4 | 10607519 | 95.6   | slightly weak band                                   |
| <i>Pita-2</i> | <i>Pita-2</i> -ID001   |   | CGAAGGCTCATCATGGGAAGA       | CTGGCATTGGTGGAGCTAGTGT              | InDel    | 12 | 10725835 | 10725939 | 105 | 93  | 2   | - | × | ○ | - | 4 | 10824087 | -98.3  |                                                      |
| <i>Pita-2</i> | <i>Pita-2</i> -ID002   |   | CCCCACAAAACAGATTTAGGG       | TGCTTAGATCCAAATAGAACAC              | InDel    | 12 | 10736661 | 10736764 | 104 | 143 | 3 † | - | ○ | - | - | 4 | 10824087 | -87.4  |                                                      |
| <i>Pita-2</i> | <i>Pita-2</i> -ID003   |   | ATCTGTTCCCTTCTTGTGC         | TCATAAAGGTGCACTAACTAGCG             | InDel    | 12 | 10745092 | 10745187 | 96  | 84  | 2   | - | ○ | - | - | 4 | 10824087 | -79.0  |                                                      |
| <i>Pita-2</i> | <i>Pita-2</i> -ID004   |   | TGTTCTGATGTGCCAACCAT        | CCCTTAGAAGAATGCTGGCATG              | InDel    | 12 | 10760837 | 10760947 | 111 | 144 | 2   | - | ○ | - | - | 4 | 10824087 | -63.3  |                                                      |
| <i>Pita-2</i> | <i>Pita-2</i> -ID006   |   | TGCTGTTGATGCGTATTTCT        | CAATAATGATGATGCGTGGC                | InDel    | 12 | 10771016 | 10771119 | 104 | 79  | 3 † | - | × | ○ | - | 4 | 10824087 | -53.1  |                                                      |
| <i>Pita-2</i> | <i>Pita-2</i> -ID007   |   | ATCCTCAACATGTGTCAAGTG       | GAACGGGAAGACTGCAATGAG               | InDel    | 12 | 10797537 | 10797637 | 101 | 118 | 2   | - | ○ | - | - | 4 | 10824087 | -26.6  |                                                      |
| <i>Pita-2</i> | <i>Pita-2</i> -ID008   |   | AATCCAGATCGAGTCCCGTC        | TGACAGAGTAGAATGACTAGCA              | InDel    | 12 | 10810754 | 10810855 | 102 | 112 | 2   | - | ○ | - | - | 4 | 10824087 | -13.3  |                                                      |
| <i>Pita-2</i> | <i>Pita-2</i> -ID009   | † | CACATAGCATAGAGCACTAACT      | AACCATCATACGGGCTATTTA               | InDel    | 12 | 10815778 | 10815879 | 102 | 114 | 2   | - | ○ | - | - | 4 | 10824087 | -8.3   |                                                      |
| <i>Pita-2</i> | <i>Pita-2</i> -ID016_3 | † | AAAGTTTCATCGCATCGAATTTA     | ACACGCGTTGGGATTTCTC                 | InDel    | 12 | 10833348 | 10833482 | 135 | 123 | 2   | ○ | ○ | × | - | 4 | 10824087 | 9.3    |                                                      |
| <i>Pita-2</i> | <i>Pita-2</i> -ID010   |   | GGTGTTCGGAGCTATTTCCA        | ACAGTTGTGCATGAAACCTAACA             | InDel    | 12 | 10853142 | 10853251 | 110 | 138 | 2   | - | ○ | - | - | 4 | 10824087 | 29.1   |                                                      |
| <i>Pita-2</i> | <i>Pita-2</i> -ID011   | † | TGCAATTAGTCGGTGTGTTGA       | ACATGAATCAGTCTGACGTCAT              | InDel    | 12 | 10853795 | 10853909 | 115 | 85  | 3   | - | ○ | - | - | 4 | 10824087 | 29.7   |                                                      |
| <i>Pita-2</i> | <i>Pita-2</i> -ID012   |   | TGGGATTACACTACACAGGGAGAGG   | GAGAAGGGGAAGCTGGGATGGGA             | InDel    | 12 | 10862608 | 10862712 | 105 | 95  | 2   | - | ○ | - | - | 4 | 10824087 | 38.5   |                                                      |
| <i>Pita-2</i> | <i>Pita-2</i> -ID013   |   | GACGACGAGAAATGGCTC          | CTTCAGGGAGCAGTCTGCTG                | InDel    | 12 | 10876975 | 10877134 | 160 | 127 | 3 † | - | ○ | - | - | 4 | 10824087 | 52.9   |                                                      |
| <i>Pita-2</i> | <i>Pita-2</i> -ID014   |   | TTTTGGGGAGGGATAGAATGGG      | CCCTAACCCCTAGAATCCACG               | InDel    | 12 | 10894020 | 10894125 | 106 | 116 | 2   | - | ○ | - | - | 4 | 10824087 | 69.9   |                                                      |
| <i>Pita-2</i> | <i>Pita-2</i> -ID015   |   | ACGAAAAGGGCAATTGATCGC       | TGAGAACATCCGAACGATAGAAGTT           | InDel    | 12 | 10896196 | 10896306 | 111 | 101 | 2   | - | ○ | - | - | 4 | 10824087 | 72.1   |                                                      |

Chr., chromosome number; CDS, coding sequence.

<sup>a</sup> The markers with a dagger (†) are recommended for distinguishing resistance alleles from the others (also see Table 5).

<sup>b</sup> Size is based on the reference genome, 'Nipponbare' IRGSP-1.0.

<sup>c</sup> Product sizes of the markers for the *Pik* locus in gray boxes were estimated from 'Kusabue' (HM048900) or 'Kanto 51' (AB616659), because these sequences are absent in the 'Nipponbare' genome.

<sup>d</sup> The variants correspond to genotype B in Supplemental Fig. 11A. The variants obtained by the four markers for the *Pik* locus include amplicons of two sizes that cannot be clearly discriminated from each other on the gel.

<sup>e</sup> Number of alleles identified under respective PCR condition. The double dagger (‡) indicates a marker genotype for which an amplicon was not detected.

<sup>f</sup> A circle or cross indicates that the result was or was not acceptable, in terms of amplification and/or balance between the alleles; a minus sign indicates that the condition was not tested.

<sup>g</sup> Asterisks mark the conditions that differ from the standard, as described in Materials and methods:

*Piz*-ID21 and *Piz*-ID28, additional 5 cycles of PCR; *Pik*-ID008 and *Pik*-ID009, denaturation at 98°C for 10 s and extension at 55°C for 1 min; *Pita*-ID04 and *Pita*-ID03, initial denaturation at 95°C for 2 min, and cycle conditions of 94°C for 30 s, 55°C for 1 min 30 s, and 72°C for 1 min.

<sup>h</sup> Positions of the respective resistance loci indicated in "Map position (bp)" in Table 1.

<sup>i</sup> Distance between CDS start and 5' end of the forward primer.

Supplemental Table 7. Detailed information of the 96 SNP genotyping assays, BRA1, for the Fluidigm genotyping platform

| Locus  | Assay name | Serial number in this set | Serial number for each locus | Chr.     | Target SNP Position (bp) <sup>a</sup> | Allele1 | Allele2 | Direction <sup>b</sup>        | Allele 1-specific primer <sup>c</sup> | Allele 2-specific primer <sup>c</sup> | Locus-specific primer               | Specific target amplification primer |
|--------|------------|---------------------------|------------------------------|----------|---------------------------------------|---------|---------|-------------------------------|---------------------------------------|---------------------------------------|-------------------------------------|--------------------------------------|
| Pit    | FA4467     | 1                         | 1                            | 2        | 2680046                               | A       | G       | +                             | TGAGGTTAAGCTATAAGCACA                 | TGAGGTTAAGCTATAAGCACA                 | CCGAGTAGATAATTAAGGCCTAGTGATT        | TGTTCTGAAGAAGCTCAATA                 |
|        | FA4453     | 2                         | 2                            | 1        | 2681202                               | A       | G       | +                             | GATATTGGTATGATGCCACCAC                | GATATTGGTATGATGCCACCAC                | ACAAATGAAATGATCTGTTTCAGT            | GCACATCGGGTAAAGAGAT                  |
|        | FA4451     | 3                         | 3                            | 1        | 2682651                               | C       | T       | -                             | CAAGGACTGCATCTATCTTCA                 | CAAGGACTGCATCTATGTTCAA                | GCAGTCTGGCATCTGGCT                  | AAATTGGGTATGATGCACTCA                |
|        | FA4454     | 4                         | 4                            | 1        | 2683065                               | C       | A       | -                             | GAACAGCACTCAATGCACCAGT                | GAACAGCACTCAATGCACCAGT                | TTGTGCACTTGCACCTCT                  | TCGACATTAAGTCTCAAGCTAGA              |
|        | FA4482     | 5                         | 5                            | 1        | 2688500                               | C       | T       | -                             | GGAGGAACAAGGTGTTGG                    | GGAGGAACAAGGTGTTGG                    | CAGTGGCATGATCTAAGCTTAATGA           | CAGTGGTATGATGTATGACAGATA             |
|        | FA4483     | 6                         | 6                            | 1        | 2688828                               | A       | T       | +                             | CAATTCGGCTCATAGAGAAAAGATG             | CAATTCGGCTCATAGAGAAAAGATG             | CAACTGGCTCATAGAGAAAAGATG            | GCCTGATCAACAACTTGCT                  |
|        | FA4649     | 7                         | 1                            | 3        | 3295740                               | G       | T       | -                             | CTATATAGAGTATATTAATCTCTCTCTC          | CTATATAGAGTATATTAATCTCTCTC            | TCGCTTAGTCTCAATTAATTAATTAATCTCTC    | AGCTAGTATAGCTTATGATTAATCTCTCTC       |
| Pish   | FA6445     | 8                         | 2                            | 1        | 33074934                              | G       | A       | -                             | GTATTGAGATAGCTAAATTTACTCTCTCC         | GTATTGAGATAGCTAAATTTACTCTCTCC         | GGTATAGTATGAGCTTAAATTTACTCTCTCC     | TGTAATGAGTAAATGAGTAAATGACTCAAAAGTAA  |
|        | FA6444     | 9                         | 3                            | 1        | 33075459                              | C       | T       | +                             | ATTGCAAAAGCTCGCCG                     | ATTGCAAAAGCTCGCCG                     | GATTGCAAAAGCTCGCCG                  | TAGTGCACAAGTAAAGAAAATCAAGCA          |
|        | FA6366     | 10                        | 4                            | 1        | 33080208                              | C       | T       | -                             | CATGAGAGAGTGCATCGCTTGT                | CATGAGAGAGTGCATCGCTTGT                | TCATGAGAGAGTGCATCGCTTGT             | ATCTGGTCAATTTTATCTTTGAAGTTCTCTATT    |
|        | FA6427     | 11                        | 5                            | 1        | 33101529                              | A       | T       | +                             | CAACCACTGTTGCACATCTACTGTGTA           | CAACCACTGTTGCACATCTACTGTGTA           | CTTTGCTTAGGAATCTACACTCAACAC         | GGGTGAAGAGATAAACAACAC                |
|        | FA6510     | 12                        | 6                            | 1        | 33146248                              | C       | T       | +                             | TCTCCTTAGTAGTAGCTCC                   | TCTCCTTAGTAGTAGCTCC                   | TCTCCTTAGTAGTAGCTCC                 | GAGAACTCAAAAGAGGTTGCA                |
|        | FA6511     | 13                        | 7                            | 1        | 33146996                              | A       | C       | -                             | TGATAGGCTGCGCT                        | TGATAGGCTGCGCT                        | GAATTAACACTTTATAATCAATTTCTGCTGCT    | AAATTAACACTTTATAATCAATTTCTGCTGCT     |
|        | FA6524     | 14                        | 8                            | 1        | 33148998                              | C       | T       | -                             | ATGCTATTTCTGCAAAACAGT                 | ATGCTATTTCTGCAAAACAGT                 | CATGCTATTTCTGCAAAACAGT              | GGACACTAAATTTTAGTATGTTGCT            |
|        | FA6545     | 15                        | 9                            | 1        | 33151594                              | G       | C       | +                             | TCAGAGAGAGCCACCTG                     | TCAGAGAGAGCCACCTG                     | TCAGAGAGAGCCACCTG                   | GACCCTGATCAGGGGCA                    |
|        | FA6665     | 16                        | 10                           | 1        | 33174003                              | A       | G       | -                             | CGTATAGGTTCTGAAAATACTCAATATTTCT       | CGTATAGGTTCTGAAAATACTCAATATTTCT       | CGTATAGGTTCTGAAAATACTCAATATTTCT     | CCAACTGGCCATGATGATCA                 |
|        | FA6667     | 17                        | 11                           | 1        | 33174848                              | C       | A       | -                             | GCATCTGCTCCCAAGCTCTG                  | GCATCTGCTCCCAAGCTCTG                  | GCATCTGCTCCCAAGCTCTG                | TCCTCTGCTCTGCTGACT                   |
|        | FA4424     | 18                        | 1                            | 2        | 35089606                              | C       | T       | -                             | GCTCCATTAAAGCACTG                     | GCTCCATTAAAGCACTG                     | GCCTCCATTAAAGCACTG                  | ACGCGCCTAAGCTGTC                     |
|        | FA4422     | 19                        | 2                            | 2        | 35090234                              | T       | G       | -                             | GGTGCGTCCGGA                          | GGTGCGTCCGGA                          | GGTGCGTCCGGA                        | TGAGACTGCAGCAGCTG                    |
|        | FA4416     | 20                        | 3                            | 2        | 35092033                              | G       | T       | -                             | GCAAGCTGAGATGACTATTGTGATATTC          | GCAAGCTGAGATGACTATTGTGATATTC          | GAACTGAGATGACTATTGTGATATTC          | TCTCAATTAATCAAGTTTACGCAAACT          |
|        | FAA408     | 21                        | 4                            | 2        | 35095702                              | C       | T       | -                             | GATTGTGGATGACCATGCT                   | GATTGTGGATGACCATGCT                   | GATTGTGGATGACCATGCT                 | CTTCATGTAATTAATTAATTAATGACTGATGCT    |
| FAA407 | 22         | 5                         | 2                            | 35095970 | G                                     | T       | -       | CATTAGCTCTTATTGGATGCACCTTACT  | CATTAGCTCTTATTGGATGCACCTTACT          | TGTTAGCTCTTATTGGATGCACCTTACT          | TGTTAGCTCTTATTGGATGCACCTTACT        |                                      |
| FAA404 | 23         | 6                         | 2                            | 35097776 | T                                     | C       | -       | GCAAGAGCTTATTGACTCTTCT        | GCAAGAGCTTATTGACTCTTCT                | GCAAGAGCTTATTGACTCTTCT                | GAAGAGTATTTCCCGGCGCA                |                                      |
| FAA401 | 24         | 7                         | 2                            | 35111607 | C                                     | T       | +       | CTGGAATCTTCCACTCAGCAT         | CTGGAATCTTCCACTCAGCAT                 | CTGGAATCTTCCACTCAGCAT                 | ACCCCAAGAGTGAAGAAAATGA              |                                      |
| FAA439 | 25         | 8                         | 2                            | 3513756  | G                                     | T       | -       | GGCCAAAGGATGCGC               | GGCCAAAGGATGCGC                       | GGCCAAAGGATGCGC                       | CTCTGCTGCTGCT                       |                                      |
| FAA446 | 26         | 9                         | 2                            | 35139569 | G                                     | T       | +       | GAGTAACATAATTAAGAGCAATCTAGG   | GAGTAACATAATTAAGAGCAATCTAGG           | GAGTAACATAATTAAGAGCAATCTAGG           | CAACCAACTCAACTTAATTAAGAGCAATCTAGG   |                                      |
| FAA437 | 27         | 1                         | 6                            | 35139796 | G                                     | A       | +       | CACTTATGAGGATC                | CACTTATGAGGATC                        | CACTTATGAGGATC                        | CACTTATGAGGATC                      |                                      |
| FAA676 | 28         | 2                         | 6                            | 10379796 | G                                     | A       | +       | GGCAGCTCAGCAAG                | GGCAGCTCAGCAAG                        | GGCAGCTCAGCAAG                        | CCTGATTCAACTCCACACT                 |                                      |
| FAA678 | 29         | 3                         | 6                            | 10382967 | G                                     | C       | -       | ATGATACTTGGGCTAGGCC           | ATGATACTTGGGCTAGGCC                   | TGATACTTGGGCTAGGCC                    | CCACCCGCCGACT                       |                                      |
| FAA679 | 30         | 4                         | 6                            | 10384890 | C                                     | T       | -       | ACAGTCAAGCCCTATTCC            | ACAGTCAAGCCCTATTCC                    | GATCAGTCAAGCCCTATTCC                  | GGCAGCAGATGGGACT                    |                                      |
| FAA680 | 31         | 5                         | 6                            | 10385269 | T                                     | G       | -       | CAAGGCTTATCACTAACATAACAAGCA   | CAAGGCTTATCACTAACATAACAAGCA           | CAAGGCTTATCACTAACATAACAAGCA           | GGAGGCTGGAATGATTCTCT                |                                      |
| FAA378 | 32         | 6                         | 6                            | 10389855 | C                                     | T       | -       | CTAACTGAGTGGAGCAGCTCAC        | CTAACTGAGTGGAGCAGCTCAC                | CTAACTGAGTGGAGCAGCTCAC                | GCTCTCAATAAGTAGCTCTCAGGT            |                                      |
| FAA697 | 33         | 7                         | 6                            | 10421778 | G                                     | A       | +       | GAATAAATCCCATCGTTACAC         | GAATAAATCCCATCGTTACAC                 | GAATAAATCCCATCGTTACAC                 | TCAACCTTAATTAACCTATACAAATGAATAAACC  |                                      |
| FAA698 | 34         | 8                         | 6                            | 10422761 | T                                     | A       | -       | GTAGTTAAAGAGTATTTTCACTTTGAGGA | GTAGTTAAAGAGTATTTTCACTTTGAGGA         | GTAGTTAAAGAGTATTTTCACTTTGAGGA         | ACCGTAGATACAAATTTATTAAGAAAATATTGGT  |                                      |
| FAA683 | 35         | 9                         | 6                            | 10422831 | G                                     | A       | +       | AACCCCTTTAGTCCGGTG            | AACCCCTTTAGTCCGGTG                    | AACCCCTTTAGTCCGGTG                    | TGCTTGGGCTGCGT                      |                                      |
| FAA702 | 36         | 10                        | 6                            | 10426588 | T                                     | A       | -       | TTAAGCACTCAAGCGGTGA           | TTAAGCACTCAAGCGGTGA                   | TTAAGCACTCAAGCGGTGA                   | GCACTCTGCTGGTCAAGGGTATCTAAT         |                                      |
| FAA703 | 37         | 11                        | 6                            | 10427313 | G                                     | C       | -       | TCGATTCCTATCCAGGATATC         | TCGATTCCTATCCAGGATATC                 | TCGATTCCTATCCAGGATATC                 | GACACTGACCCCACTGAGA                 |                                      |
| FAA704 | 38         | 12                        | 6                            | 10427575 | T                                     | A       | +       | CGCCCAATGATGATGATATCA         | CGCCCAATGATGATGATATCA                 | CAACTTTTCTCTTCTCTGAGGCTTTCTTCT        | TGCTTTCAAGAAAGATCTATCC              |                                      |
| FAA270 | 40         | 2                         | 6                            | 17105485 | G                                     | A       | +       | GGATTTAGTGGGAGATGGG           | GGATTTAGTGGGAGATGGG                   | GGATTTAGTGGGAGATGGG                   | CAGCACAAGAGTCAACATAAAGTGT           |                                      |
| FAA271 | 41         | 3                         | 6                            | 17121368 | G                                     | C       | -       | GTTGCCAAAATAGCATATTC          | GTTGCCAAAATAGCATATTC                  | GTTGCCAAAATAGCATATTC                  | ACTACTGCCACCAACCA                   |                                      |
| FAA280 | 42         | 4                         | 6                            | 17159082 | A                                     | G       | -       | GTCATAATCACTTAAATCTTTAGCTTGGT | GTCATAATCACTTAAATCTTTAGCTTGGT         | GTCATAATCACTTAAATCTTTAGCTTGGT         | GGATACAGCAGCAATGACA                 |                                      |
| FAA294 | 43         | 5                         | 6                            | 17161116 | G                                     | A       | +       | TCAGGTCGAAGTACC               | TCAGGTCGAAGTACC                       | TCAGGTCGAAGTACC                       | AGGGAGCAGAGCATGTTTCA                |                                      |
| FAA283 | 44         | 6                         | 6                            | 17166899 | C                                     | T       | +       | AGCAATAGTTCGGGCAAC            | AGCAATAGTTCGGGCAAC                    | AGCAATAGTTCGGGCAAC                    | TTCTGTAAATAGTACTCACTAGTATGATG       |                                      |
| FAA288 | 45         | 7                         | 6                            | 17174653 | G                                     | A       | +       | ATGAACCAATGTTAAATAGCGGCG      | ATGAACCAATGTTAAATAGCGGCG              | ATGAACCAATGTTAAATAGCGGCG              | GGTTCGCCCTATTCAATAGG                |                                      |
| FAA292 | 46         | 8                         | 6                            | 17186714 | G                                     | T       | -       | CSAGCCTCAAGGACAC              | CSAGCCTCAAGGACAC                      | CSAGCCTCAAGGACAC                      | GGTTCGGCTATGATGAACTGCT              |                                      |
| FAA293 | 47         | 9                         | 6                            | 17192023 | A                                     | G       | +       | ACTATGAGTC                    | ACTATGAGTC                            | ACTATGAGTC                            | GATCAGGAGTCCG                       |                                      |
| FAA505 | 49         | 1                         | 9                            | 9663840  | C                                     | G       | +       | ATTGCACTCTTGTGATGATCTACT      | ATTGCACTCTTGTGATGATCTACT              | ATTGCACTCTTGTGATGATCTACT              | GCTATTGACAGCAATGTTGAGGAA            |                                      |
| FAA494 | 50         | 3                         | 9                            | 9667330  | G                                     | T       | -       | TGACAGTCTCTGCACAC             | TGACAGTCTCTGCACAC                     | TGACAGTCTCTGCACAC                     | GCATCTTTTACGAGCTG                   |                                      |
| FAA495 | 51         | 4                         | 9                            | 9668417  | C                                     | G       | +       | GCTCACTCTTGTGAGGTCTCC         | GCTCACTCTTGTGAGGTCTCC                 | GCTCACTCTTGTGAGGTCTCC                 | GCATCAAGCTCAGCCACT                  |                                      |
| FAA501 | 52         | 5                         | 9                            | 9672424  | C                                     | T       | -       | TGCGCAAGTGCAGAAAGT            | TGCGCAAGTGCAGAAAGT                    | GATTGGCAAGTGCAGAAAGT                  | GGGTAATCTCTCTCTTCACTTCT             |                                      |
| FAA526 | 53         | 6                         | 9                            | 9787343  | T                                     | G       | -       | GTGTGTGGTCACTTTTGGCAT         | GTGTGTGGTCACTTTTGGCAT                 | GTGTGTGGTCACTTTTGGCAT                 | GGAAATTTTCACTTATCACTACTTTTAAACCCAAA |                                      |
| FAA527 | 54         | 7                         | 9                            | 9787450  | T                                     | A       | -       | CGATATAACCTAGCTCAATCTGTTAA    | CGATATAACCTAGCTCAATCTGTTAA            | CGATATAACCTAGCTCAATCTGTTAA            | TGTAATAAAGTCTTCCCAACTATGAAATAGT     |                                      |
| FAA536 | 55         | 8                         | 9                            | 9834756  | T                                     | A       | +       | TCAGTGAATGGCCGATCAACTCT       | TCAGTGAATGGCCGATCAACTCT               | TCAGTGAATGGCCGATCAACTCT               | GATCATCTTTAATAGTCTTCCACTATAGC       |                                      |
| FAA535 | 56         | 9                         | 9                            | 9853957  | G                                     | T       | -       | AGCTTCCGTTGTTGAATGATC         | AGCTTCCGTTGTTGAATGATC                 | AGCTTCCGTTGTTGAATGATC                 | CGTTTGGTGGATGATGGTATGAGA            |                                      |
| FAA608 | 57         | 1                         | 11                           | 6540923  | G                                     | C       | -       | CCCTGTGATCTGATAGTAAGAAC       | CCCTGTGATCTGATAGTAAGAAC               | CCCTGTGATCTGATAGTAAGAAC               | GCGCTTGGGCTT                        |                                      |
| FAA605 | 58         | 2                         | 11                           | 6540905  | G                                     | T       | -       | TGCGCATCTAGAGCACTCAG          | TGCGCATCTAGAGCACTCAG                  | TGCGCATCTAGAGCACTCAG                  | GCGAGTGAAGTCCACTCACTAGCA            |                                      |
| FAA598 | 59         | 3                         | 11                           | 6543100  | G                                     | C       | -       | GAGGAGCAAGTGTGCAC             | GAGGAGCAAGTGTGCAC                     | GAGGAGCAAGTGTGCAC                     | GGTACCCTTCTTACGCTCTCA               |                                      |
| FAA615 | 60         | 4                         | 11                           | 6544401  | C                                     | T       | -       | TCAGCAAGTGTGCAC               | TCAGCAAGTGTGCAC                       | TCAGCAAGTGTGCAC                       | GCAGAAACAGCAGCATAGG                 |                                      |
| FAA617 | 61         | 5                         | 11                           | 6634911  | A                                     | C       | -       | AATTAATCTATGACACGGTGCAT       | AATTAATCTATGACACGGTGCAT               | AATTAATCTATGACACGGTGCAT               | TGTTCCACTGTGAAAAGAAATAGGT           |                                      |
| FAA620 | 62         | 6                         | 11                           | 6638905  | A                                     | G       | -       | CAAGGAATGAGAAAGAGCACT         | CAAGGAATGAGAAAGAGCACT                 | CAAGGAATGAGAAAGAGCACT                 | TGGAATTTGGCTTGAAGCT                 |                                      |
| FAA624 | 63         | 7                         | 11                           | 6656541  | A                                     | C       | +       | GAGACTGTCAGCAAGATGCTATATA     | GAGACTGTCAGCAAGATGCTATATA             | GAGACTGTCAGCAAGATGCTATATA             | CCATCTTGACAGCTTATCAC                |                                      |
| FAA625 | 64         | 8                         | 11                           | 6707030  | G                                     | C       | -       | GCTGGTAAGCTGATGATGCTTAC       | GCTGGTAAGCTGATGATGCTTAC               | GCTGGTAAGCTGATGATGCTTAC               | TGCCCAAAATGATGATCAAGCC              |                                      |
| FAA742 | 65         | 1                         | 11                           | 27817940 | G                                     | C       | -       | CAATGCATGTTCTGACG             | CAATGCATGTTCTGACG                     | CAATGCATGTTCTGACG                     | GCATGCTTCTGCTGATG                   |                                      |
| FAA740 | 66         | 2                         | 11                           | 27818557 | G                                     | A       | -       | GTGATGAGAGCCATCACCTTC         | GTGATGAGAGCCATCACCTTC                 | GTGATGAGAGCCATCACCTTC                 | TGAACTAATCAGAGAAAAGAGCAGACTG        |                                      |
| FAA737 | 67         | 3                         | 11                           | 27820870 | C                                     | T       | -       | CSATGATGAGACCTATCCG           | CSATGATGAGACCTATCCG                   | CSATGATGAGACCTATCCG                   | GCCTCTCTGCTCTGATG                   |                                      |
| FAA735 | 68         | 4                         | 11                           | 27823073 | C                                     | T       | +       | CTGCAATAGAGTCACTTAAAGATGTC    | CTGCAATAGAGTCACTTAAAGATGTC            | CTGCAATAGAGTCACTTAAAGATGTC            | GTTCCTGCAAGGATGATTTACTACTCTGT       |                                      |
| FAA734 | 69         | 5                         | 11                           | 27823722 | G                                     | A       | -       | GCACAGAGCAGATGAGTGAGAC        | GCACAGAGCAGATGAGTGAGAC                | GCACAGAGCAGATGAGTGAGAC                | TCAAGAGAGGACTTGCA                   |                                      |
| FAA732 | 70         | 6                         | 11                           | 27828066 | A                                     | C       | +       | TCGAAACAAGCTGGCATGTA          | TCGAAACAAGCTGGCATGTA                  | TCGAAACAAGCTGGCATGTA                  | GGCCTAATTAATGTAAGAACTCAATTAAT       |                                      |
| FAA710 | 71         | 7                         | 11                           | No hit   | C                                     | G       | Unknown | ACATTTTCTTCACTCAGCACCAC       | ACATTTTCTTCACTCAGCACCAC               | ACATTTTCTTCACTCAGCACCAC               | CTGTGCAAGCTTGGTGA                   |                                      |
| FAA712 | 72         | 8                         | 11                           | No hit   | A                                     | C       | Unknown | CTATCCCCAAGAACGACA            | CTATCCCCAAGAACGACA                    | CTATCCCCAAGAACGACA                    | ATCCCCCAAGAACGACC                   |                                      |
| FAA535 | 73         | 9                         | 11                           | No hit   | C                                     | G       | Unknown | CCGCGTGAACCTAAGAGAC           | CCGCGTGAACCTAAGAGAC                   | CCGCGTGAACCTAAGAGAC                   | AGTCAATGCACCTCAAGCACA               |                                      |
| FAA717 | 74         | 10                        | 11                           | No hit   | G                                     | C       | Unknown | GCACTCAACGCAAAAGGGC           | GCACTCAACGCAAAAGGGC                   | GCACTCAACGCAAAAGGGC                   | GCCTCCCTACTCGCCCT                   |                                      |
| FAA718 | 75         | 11                        | 11                           | No hit   | T                                     | C       | Unknown | TGAGTTCCATGGGTGGT             | TGAGTTCCATGGGTGGT                     | TGAGTTCCATGGGTGGT                     | GGCAGAGACTCAAGAAAGTAA               |                                      |
| FAA721 | 76         | 12                        | 11                           | No hit   | A                                     | T       | Unknown | CAGTATTGAGCAAAAGCTAGTGAA      | CAGTATTGAGCAAAAGCTAGTGAA              | CAGTATTGAGCAAAAGCTAGTGAA              | GCATCACTCTGAGAGT                    |                                      |
| FAA723 | 77         | 13                        | 11                           | No hit   | A                                     | C       | Unknown | GCCTTATGGGCTTACCTTTT          | GCCTTATGGGCTTACCTTTT                  | GCCTTATGGGCTTACCTTTT                  | AGGAGCCCAAGAAAGAA                   |                                      |
| FAA726 | 78         | 14                        | 11                           | No hit   | T                                     | C       | Unknown | CCCAACAGCCTACCT               | CCCAACAGCCTACCT                       | CCCAACAGCCTACCT                       | GGAGTGAAGAGTGAAGG                   |                                      |
| FAA729 | 79         | 15                        | 11                           | 27992151 | C                                     | T       | -       | CTTCCATCATCTCTGTGAAC          | CTTCCATCATCTCTGTGAAC                  | CTTCCATCATCTCTGTGAAC                  | CGAAGAGTGGCTGGCT                    |                                      |
| FAA750 | 80         | 16                        | 11                           | 27993468 | T                                     | C       | +       | TGTTGAGAGCTCTCGAAAGT          | TGTTGAGAGCTCTCGAAAGT                  | TGTTGAGAGCTCTCGAAAGT                  | TGCAATGGTCAAGAAAGAGTGCAC            |                                      |
| FAA751 | 81         | 17                        | 11                           | 27995372 | A                                     | G       | +       | CTCAATCTATGGACTCAGCTGACA      | CTCAATCTATGGACTCAGCTGACA              | CTCAATCTATGGACTCAGCTGACA              | TCCATGGTCAAGACTGGCT                 |                                      |
| FAA752 | 82         | 18                        | 11                           | 27995713 | A                                     | C       | +       | AAGCATGAGAAATTAATTTCAAGGCTG   | AAGCATGAGAAATTAATTTCAAGGCTG           | AAGCATGAGAAATTAATTTCAAGGCTG           | AATTAATACAGAAAGAAATTAATTTCAAGGCTG   |                                      |
| FAA753 | 83         | 19                        | 11                           | 27996426 | A                                     | G       | -       | GTGATGGGGCAATCAGCTT           | GTGATGGGGCAATCAGCTT                   | GTGATGGGGCAATCAGCTT                   | TCTTGGTGAATTTGACAACTCA              |                                      |
| FAA758 | 84         | 20                        | 11                           | 28006310 | T                                     | G       | -       | TTTCCCTGACATATCATCCCA         | TTTCCCTGACATATCATCCCA                 | TTTCCCTGACATATCATCCCA                 | GCAACTGCTTTAGGACTTCTCTTATA          |                                      |
| FAA451 | 85         | 1                         | 12                           | 1060754  | A                                     | C       | -       | ATCAAGTCAAGTGAAGATGATAGA      | ATCAAGTCAAGTGAAGATGATAGA              | ATCAAGTCAAGTGAAGATGATAGA              | CTTTTCTGCTGGCT                      |                                      |
| FAA544 | 86         | 2                         | 12                           | 10612484 | A                                     | T       | -       | TGCGAGCAGAGAGAGT              | TGCGAGCAGAGAGAGT                      | TGCGAGCAGAGAGAGT                      | TGTTGCGAGAG                         |                                      |
| FAA546 | 87         | 3                         | 12                           | 10617954 | C                                     | A       | -       | TGCAACCCTGATGAC               | TGCAACCCTGATGAC                       | TGCAACCCTGATGAC                       | CGAGCTCAAGGCTTCCA                   |                                      |
| FAA553 | 88         | 4                         | 12                           | 10612903 | C                                     | G       | -       | AATGTTGATCGCTTTAATGAAGAA      | AATGTTGATCGCTTTAATGAAGAA              | AATGTTGATCGCTTTAATGAAGAA              | GCATTAGAGTACCTCTGCGAACA             |                                      |
| FAA556 | 89         | 5                         | 12                           | 1061     |                                       |         |         |                               |                                       |                                       |                                     |                                      |
