# Supplementary material for: Rapid DNA-genotyping system targeting ten loci for resistance to blast disease in rice
Source: PubMed Central journal article supplement — Breed Sci. 2019 Feb 15;69(1):68–83. doi: 10.1270/jsbbs.18143 (PMC6507720; doi:10.1270/jsbbs.18143), 2019-02-15
Supplement: 69_18143_3.pdf [file 69_18143_3.pdf]

## Supplemental Text 1.

### Literature cited in supplementary materials

Ashikawa, I., N. Hayashi, H. Yamane, H. Kanamori, J. Wu, T. Matsumoto, K. Ono and M. Yano (2008) Two adjacent nucleotide-binding site–leucine-rich repeat class genes are required to confer *Pikm*-specific rice blast resistance. *Genetics* 180: 2267–2276.

Ashikawa, I., N. Hayashi, F. Abe, J. Wu and T. Matsumoto (2012) Characterization of the rice blast resistance gene *Pik* cloned from Kanto51. *Mol. Breed.* 30: 485–494.

Bryan, G.T., K.S. Wu, L. Farrall, Y. Jia, H.P. Hershey, S.A. McAdams, K.N. Faulk, G.K. Donaldson, R. Tarchini and B. Valent (2000) A single amino acid difference distinguishes resistant and susceptible alleles of the rice blast resistance gene *Pi-ta*. *Plant Cell* 12: 2033–2046.

Chen, X., J. Shang, D. Chen, C. Lei, Y. Zou, W. Zhai, G. Liu, J. Xu, Z. Ling, G. Cao *et al.* (2006) A B-lectin receptor kinase gene conferring rice blast resistance. *Plant J.* 46: 794–804.

Fukuoka, S., S. Yamamoto, R. Mizobuchi, U. Yamanouchi, K. Ono, N. Kitazawa, N. Yasuda, Y. Fujita, T. T. T. Nguyen, S. Koizumi *et al.* (2014) Multiple functional polymorphisms in a single disease resistance gene in rice enhance durable resistance to blast. *Sci. Rep.* 4:1–7.

Ebitani, T., N. Hayashi, M. Omoteno, H. Ozaki, M. Yano, M. Morikawa and Y. Fukuta (2011) Characterization of *Pi13*, a blast resistance gene that maps to chromosome 6 in *indica* rice (*Oryza sativa* L. variety, Kasalath). *Breed. Sci.* 61: 251–259.

Hayashi, K. and H. Yoshida (2009) Refunctionalization of the ancient rice blast disease resistance gene *Pit* by the recruitment of a retrotransposon as a promoter. *Plant J.* 57: 413–425.

- Hua, L., J. Wu, C. Chen, W. Wu, X. He, F. Lin, L. Wang, I. Ashikawa, T. Matsumoto and Q. Pan (2012) The isolation of *Pi1*, an allele at the *Pik* locus which confers broad spectrum resistance to rice blast. *Theor. Appl. Genet.* 125: 1047–1055.
- Lee, S.K., M.Y. Song, Y.S. Seo, H.K. Kim, S. Ko, P.J. Cao, J.P. Suh, G. Yi, J.H. Roh, S. Lee *et al.* (2009) Rice *Pi5*-mediated resistance to *Magnaporthe oryzae* requires the presence of two coiled-coil-nucleotide-binding-leucine-rich repeat genes. *Genetics* 181: 1627–1638.
- Okuyama, Y., H. Kanzaki, A. Abe, K. Yoshida, M. Tamiru, H. Saitoh, T. Fujibe, H. Matsumura, M. Shenton, D.C. Galam *et al.* (2011) A multifaceted genomics approach allows the isolation of the rice *Pia*-blast resistance gene consisting of two adjacent NBS-LRR protein genes. *Plant J.* 66: 467–479.
- Qu, S., G. Liu, B. Zhou, M. Bellizzi, L. Zeng, L. Dai, B. Han and G.L. Wang (2006) The broad-spectrum blast resistance gene *Pi9* encodes a nucleotide-binding site-leucine-rich repeat protein and is a member of a multigene family in rice. *Genetics* 172: 1901–1914.
- Singh, W.H., R.K. Kapila, T.R. Sharma and R. Rathour (2015) Genetic and physical mapping of a new allele of *Pik* locus from japonica rice ‘Liziangxintuanheigu’. *Euphytica* 205: 889–901.
- Takagi, H., A. Uemura, H. Yaegashi, M. Tamiru, A. Abe, C. Mitsuoka, H. Utsushi, S. Natsume, H. Kanzaki, H. Matsumura *et al.* (2013) MutMap-Gap: whole-genome resequencing of mutant F2 progeny bulk combined with *de novo* assembly of gap regions identifies the rice blast resistance gene *Pii*. *New Phytol.* 200: 276–283.
- Takahashi, A., N. Hayashi, A. Miyao and H. Hirochika (2010) Unique features of the rice blast resistance *Pish* locus revealed by large scale retrotransposon-tagging. *BMC*

Plant Biol. 10: 175.

Takahashi, A., N. Hayashi and H. Hirochika (2017) Isolation of blast resistance genes, *Pita-2* and *Pil9*, which encode non-NBS-LRR proteins. Jpn. J. Phytopathol. 83: 171 (in Japanese).

Wang, Z.X., M. Yano, U. Yamanouchi, M. Iwamoto, L. Monna, H. Hayasaka, Y. Katayose and T. Sasaki (1999) The *Pib* gene for rice blast resistance belongs to the nucleotide binding and leucine-rich repeat class of plant disease resistance genes. Plant J. 19: 55–64.

Yuan, B., C. Zhai, W. Wang, X. Zeng, X. Xu, H. Hu, F. Lin, L. Wang and Q. Pan (2011) The *Pik-p* resistance to *Magnaporthe oryzae* in rice is mediated by a pair of closely linked CC-NBS-LRR genes. Theor. Appl. Genet. 122: 1017–1028.

Zhai, C., F. Lin, Z. Dong, X. He, B. Yuan, X. Zeng, L. Wang and Q. Pan (2011) The isolation and characterization of *Pik*, a rice blast resistance gene which emerged after rice domestication. New Phytol. 189: 321–334.

Zhai, C., Y. Zhang, N. Yao, F. Lin, Z. Liu, Z. Dong, L. Wang and Q. Pan (2014) Function and interaction of the coupled genes responsible for *Pik-h* encoded rice blast resistance. PLoS ONE 9: e98067.

Zhou, B., S. Qu, G. Liu, M. Dolan, H. Sakai, G. Lu, M. Bellizzi and G.L. Wang (2006) The eight amino-acid differences within three leucine-rich repeats between Pi2 and Piz-t resistance proteins determine the resistance specificity to *Magnaporthe grisea*. Mol. Plant Microbe Interact. 19: 1216–1228.
